# Supplementary material for: Metal-free iodination of arylaldehydes for total synthesis of aristogins A–F and hernandial
Source: Royal Society of Chemistry journal article supplement (doi:10.1039/d4ob00603h), 2024-01-01
Supplement: d4ob00603h1.pdf [file d4ob00603h1.pdf]

# Supporting Information

## For

### Metal-Free Iodination of Arylaldehydes for Total Synthesis of Aristogins A–F and Hernandial

Fufang Wu,<sup>1\*</sup> Chunmei Tang,<sup>1</sup> Xuejian Li,<sup>1</sup> Nan Li,<sup>1</sup> Miao Liu,<sup>1</sup> Danqin Li,<sup>1</sup> Rongrong Dai,<sup>1</sup> Xiaobao Shen,<sup>1\*</sup> and Hongbin Zhai<sup>2\*</sup>

---

\* Corresponding author.

*E-mail address:* [fufang\\_wu@foxmail.com](mailto:fufang_wu@foxmail.com) (F. Wu)

\* Corresponding author.

*E-mail address:* [zhaihb@pku.edu.cn](mailto:zhaihb@pku.edu.cn) (H. Zhai)

\* Corresponding author.

*E-mail address:* [shnxiaobao@foxmail.com](mailto:shnxiaobao@foxmail.com) (X. Shen)

**Table of contents**

|                                                                 |                |
|-----------------------------------------------------------------|----------------|
| <b>1. General Information.....</b>                              | <b>S1</b>      |
| <b>2. General procedure of reactions.....</b>                   | <b>S1-S3</b>   |
| <b>3. Characterization Data.....</b>                            | <b>S3-S17</b>  |
| <b>4. <sup>1</sup>H NMR and <sup>13</sup>C NMR spectra.....</b> | <b>S17-S75</b> |

## 1. General Information

All chemical reagents were purchased from commercial suppliers and can be used without further purification. Unless otherwise specified, all reactions were run under nitrogen atmosphere.  $^1\text{H}$  NMR and  $^{13}\text{C}$  NMR spectra were recorded on a Bruker spectrometer (at 400 and 101 MHz, respectively). TMS was used as reference for chemical shifts. The high-resolution mass spectra (HRMS) were recorded on a Waters UPLC G2-XS Qt of instrument.

**Note:** The reactions and subsequent workup were conducted behind a blast shield with the sash positioned as low as possible. Although no issues were encountered during the synthesis, appropriate precautions were taken.

## 2. General procedure of reactions

### I. General experimental procedure for the Iodination of Arylaldehydes

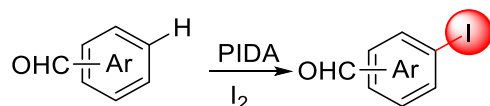

Arylaldehyde (1 mmol), PIDA (1.5 mmol), I<sub>2</sub> (1 mmol), and DCM (2 mL) were combined in a Schlenk tube. The mixture was stirred for 3 hours at 60 °C using a heating mantle under N<sub>2</sub>. Subsequently, the reaction mixture was quenched by adding Na<sub>2</sub>SO<sub>3</sub>(aq) (15 mL), and then extracted with DCM three times. The resulting solution was dried with anhydrous Na<sub>2</sub>SO<sub>4</sub> and concentrated. The crude residue obtained was purified by column chromatography on silica gel using petroleum ether : ethyl acetate = 30 : 1–15 : 1 as eluent to yield the desired products.

### II. General experimental procedure for Hernandial and Aristogin A, B, C

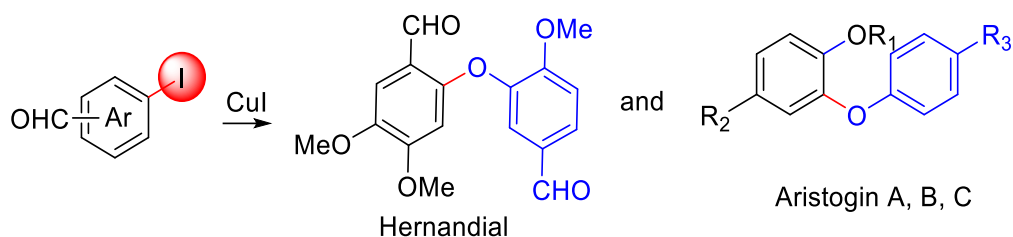

Iodo arylaldehyde (1 mmol) and substituted phenol compounds (1 mmol), CuI (0.1 mmol), DMG [N,N-Dimethylglycine] (0.1 mmol),  $\text{K}_3\text{PO}_4$  (2 mmol), and DMSO (2 mL) were added to a Schlenk tube, and the mixture was stirred for 24 hours at 120 °C using a heating mantle under  $\text{N}_2$ . After reaction, the mixture was quenched by water, and extracted with EtOAc for 3 times, dried with anhydrous  $\text{Na}_2\text{SO}_4$ , and concentrated. The crude residue was purified by column chromatography on silica gel using petroleum ether/EtOAc (10:1) as eluent to afford the desired product Hernandial and Aristogin A, B, C.

### III. Synthesis of Aristogin D

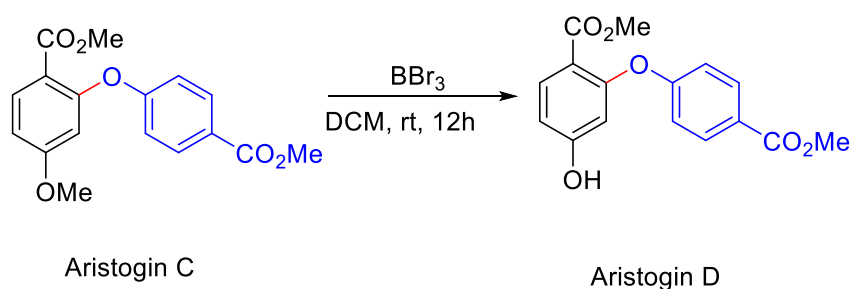

$\text{BBr}_3$  (1 M in DCM, 2 mL) was added to the solution of Aristogin C (12.0 mg 37.9  $\mu\text{mol}$ ) in DCM, and the mixture was stirred at room temperature for 12h. Then the solvent was removed under reduced pressure. the crude residue was purified by thinlayer chromatography to obtain the desired Aristogin D using petroleum ether/EtOAc (3:1) as the developing agent.

### IV. Synthesis of Aristogin E and F



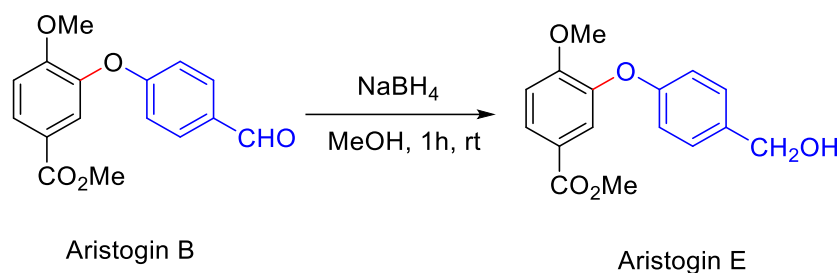

NaBH<sub>4</sub> (6.6 mg, 0.17 mmol, 1 equiv) was added to a solution of Aristogin B (50.0 mg, 0.17 mmol) in MeOH (2.5 mL), and the mixture was stirred for 1 h at room temperature. Then, the reaction was quenched with water, and extracted with EtOAc for 3 times, dried with anhydrous Na<sub>2</sub>SO<sub>4</sub>, and concentrated in vacuo to give the crude product Aristogin E which can be changed to Aristogin F directly. The crude product could also be purified by column chromatography on silica gel using petroleum ether/EtOAc (10:1) as eluent to afford the desired product Aristogin E.

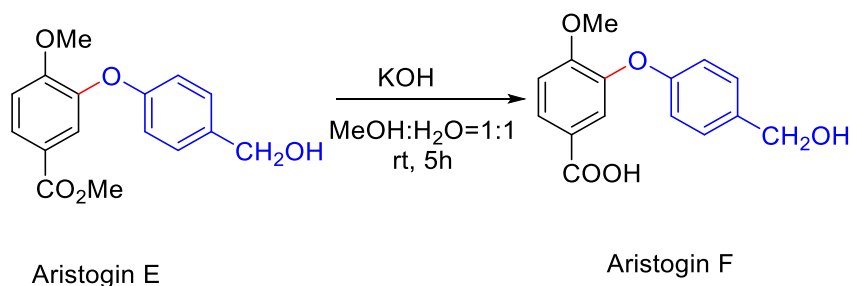

KOH (80 mg, 1.43 mmol, 14.3 equiv) was added to the solution of Aristogin E (crude) in MeOH (5 mL), and the mixture was stirred for 5 h at room temperature. Then, the reaction was extracted with EtOAc for 3 times, dried with anhydrous Na<sub>2</sub>SO<sub>4</sub>, and concentrated in vacuo to give the crude product. The crude product could also be purified by column chromatography on silica gel using petroleum ether/EtOAc (1:1) as eluent to afford the desired product Aristogin F.

### 3. Characterization Data

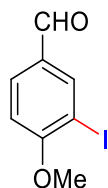

**3-iodo-4-methoxybenzaldehyde (2)**<sup>1</sup>. Product **2** was synthesized according to experimental procedure I and purified by column chromatography (petroleum ether : ethyl acetate= 15 : 1). white solid (236 mg, 0.9 mmol, 90% yield); mp 115–116 °C. <sup>1</sup>H NMR (400 MHz, CDCl<sub>3</sub>) δ 9.82 (s, 1H), 8.31 (d, *J* = 1.9 Hz, 1H), 7.86 (dd, *J* = 8.5, 2.0 Hz, 1H), 6.93 (d, *J* = 8.5 Hz, 1H), 3.98 (s, 3H); <sup>13</sup>C{<sup>1</sup>H} NMR (101 MHz, CDCl<sub>3</sub>) δ 189.4, 162.8, 141.1, 132.1, 131.4, 110.5, 86.5, 56.8; HRMS (ESI) *m/z* [M+H]<sup>+</sup> calcd for C<sub>8</sub>H<sub>8</sub>O<sub>2</sub>I: 262.9464; found: 262.9576.

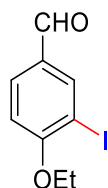

**4-ethoxy-3-iodobenzaldehyde (3)**<sup>2</sup>. Product **3** was synthesized according to experimental procedure I and purified by column chromatography (petroleum ether : ethyl acetate= 15 : 1). white solid (262 mg, 0.95 mmol, 95% yield); mp 78–81 °C. <sup>1</sup>H NMR (400 MHz, CDCl<sub>3</sub>) δ 9.81 (s, 1H), 8.30 (d, *J* = 2.0 Hz, 1H), 7.83 (dd, *J* = 8.5, 2.1 Hz, 1H), 6.88 (d, *J* = 8.5 Hz, 1H), 4.20 (q, *J* = 7.0 Hz, 2H), 1.54 (t, *J* = 7.0 Hz, 3H); <sup>13</sup>C{<sup>1</sup>H} NMR (101 MHz, CDCl<sub>3</sub>) δ 189.5, 162.3, 141.2, 132.0, 131.2, 111.3, 87.0, 65.4, 14.5; HRMS (ESI) *m/z* [M+H]<sup>+</sup> calcd for C<sub>9</sub>H<sub>10</sub>O<sub>2</sub>I: 276.9720; found: 276.9722.

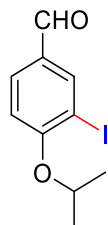

**3-iodo-isopropoxybenzaldehyde (4)**. Product **4** was synthesized according to experimental procedure I and purified by column chromatography (petroleum ether : ethyl acetate= 10 : 1). white oil (203 mg, 0.7 mmol, 70% yield); <sup>1</sup>H NMR (400 MHz, CDCl<sub>3</sub>) δ 9.79 (s, 1H), 8.29 (d, *J* = 2.0 Hz, 1H), 7.80 (dd, *J* = 8.5, 1.9 Hz, 1H), 6.87 (d, *J* = 8.5 Hz, 1H), 4.70 (m, *J* = 6.1 Hz, 1H), 1.43 (s, 3H), 1.42 (s, 3H); <sup>13</sup>C{<sup>1</sup>H} NMR (101 MHz, CDCl<sub>3</sub>) δ 189.4, 161.6, 141.5, 131.7, 131.0, 115.6, 112.4, 88.2, 72.4, 21.9; HRMS (ESI) *m/z* [M+H]<sup>+</sup> calcd for C<sub>10</sub>H<sub>12</sub>O<sub>2</sub>I: 290.9877; found: 290.9890.

<sup>1</sup> Kinsinger T, Kazmaier U. *Org. Lett.* **2018**, 20(23): 7726-7730.

<sup>2</sup> Racys D T, Warrilow C E, Pimlott S L, Sutherland A. *Org. Lett.* **2015**, 17 (19), 4782-4785.

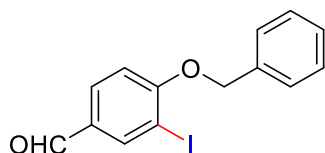

**4-(benzyloxy)-3-iodobenzaldehyde (5).** Product **5** was synthesized according to experimental procedure I and purified by column chromatography (petroleum ether : ethyl acetate= 15 : 1). white solid (321 mg, 0.93 mmol, 93% yield); mp 164–165 °C.  $^1\text{H}$  NMR (400 MHz,  $\text{CDCl}_3$ )  $\delta$  9.81 (s, 1H), 8.33 (d,  $J$  = 2.0 Hz, 1H), 7.81 (dd,  $J$  = 8.5, 2.0 Hz, 1H), 7.5–7.47 (m, 2H), 7.44–7.39 (m, 2H), 7.36 (d,  $J$  = 7.3 Hz, 1H), 6.95 (d,  $J$  = 8.5 Hz, 1H), 5.25 (s, 2H);  $^{13}\text{C}\{^1\text{H}\}$  NMR (101 MHz,  $\text{CDCl}_3$ )  $\delta$  189.4, 161.8, 141.2, 135.5, 131.9, 131.6, 128.8, 128.3, 127.0, 112.0, 87.1, 71.2; HRMS (ESI)  $m/z$   $[\text{M}+\text{H}]^+$  calcd for  $\text{C}_{14}\text{H}_{12}\text{O}_2\text{I}$ : 338.9877; found: 338.9886.

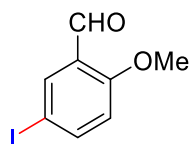

**5-iodo-2-methoxybenzaldehyde (6)**<sup>2</sup>. Product **6** was synthesized according to experimental procedure I and purified by column chromatography (petroleum ether : ethyl acetate= 15 : 1). white solid (249 mg, 0.95 mmol, 95% yield); mp 142–143 °C.  $^1\text{H}$  NMR (400 MHz,  $\text{CDCl}_3$ )  $\delta$  10.32 (s, 1H), 8.06 (d,  $J$  = 2.4 Hz, 1H), 7.78 (dd,  $J$  = 8.8, 2.4 Hz, 1H), 6.77 (d,  $J$  = 8.8 Hz, 1H), 3.90 (s, 3H);  $^{13}\text{C}\{^1\text{H}\}$  NMR (101 MHz,  $\text{CDCl}_3$ )  $\delta$  188.3, 161.4, 144.2, 137.0, 126.5, 114.2, 83.0, 55.9. HRMS (ESI)  $m/z$   $[\text{M}+\text{H}]^+$  calcd for  $\text{C}_8\text{H}_8\text{O}_2\text{I}$ : 262.9564; found: 262.9576; HRMS (ESI)  $m/z$   $[\text{M}+\text{H}]^+$  calcd for  $\text{C}_8\text{H}_8\text{O}_2\text{I}$ : 262.9564; found: 262.9576.

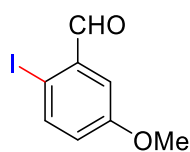

**2-iodo-5-methoxybenzaldehyde (7)**<sup>3</sup>. Product **7** was synthesized according to experimental procedure I and purified by column chromatography (petroleum ether : ethyl acetate= 15 : 1). white solid (244 mg, 0.93 mmol, 93% yield); mp 112–113 °C.  $^1\text{H}$  NMR (400 MHz,  $\text{CDCl}_3$ )  $\delta$  10.00 (s, 1H), 7.78 (d,  $J$  = 8.7 Hz, 1H), 7.40 (d,  $J$  = 3.2 Hz, 1H), 6.90 (dd,  $J$  = 8.7, 3.2 Hz, 1H), 3.83 (s, 3H);  $^{13}\text{C}\{^1\text{H}\}$  NMR (101 MHz,  $\text{CDCl}_3$ )  $\delta$  195.7, 160.2, 141.0, 135.6, 123.5, 113.5, 89.9, 55.7; HRMS (ESI)  $m/z$   $[\text{M}+\text{H}]^+$  calcd for  $\text{C}_8\text{H}_8\text{O}_2\text{I}$ : 262.9564; found: 262.9573.

<sup>3</sup> Whyte A, Olson M E, Lautens M. *Org. Lett.* **2017**, *20* (2), 345-348.

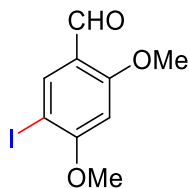

**5-iodo-3,4-dimethoxybenzaldehyde (8)**<sup>2</sup>. Product **8** was synthesized according to experimental procedure I and purified by column chromatography (petroleum ether : ethyl acetate= 15 : 1). white solid (248 mg, 0.85 mmol, 85% yield); mp 171–172 °C. <sup>1</sup>H NMR (400 MHz, CDCl<sub>3</sub>) δ 10.18 (s, 1H), 8.20 (s, 1H), 6.38 (s, 1H), 3.96 (s, 3H), 3.94 (s, 3H); <sup>13</sup>C{<sup>1</sup>H} NMR (101 MHz, CDCl<sub>3</sub>) δ 187.1, 164.1, 163.8, 139.3, 120.3, 94.8, 75.6, 56.7, 55.9; HRMS (ESI) m/z [M+Na]<sup>+</sup> calcd for C<sub>9</sub>H<sub>9</sub>O<sub>3</sub>NaI: 314.9489; found: 314.9487.

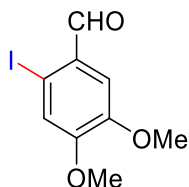

**2-iodo-4,5-dimethoxybenzaldehyde (9)**<sup>4</sup>. Product **9** was synthesized according to experimental procedure I and purified by column chromatography (petroleum ether : ethyl acetate= 15 : 1). yellow solid (254 mg, 0.87 mmol, 87% yield); mp 137–139 °C. <sup>1</sup>H NMR (400 MHz, CDCl<sub>3</sub>) δ 9.86 (s, 1H), 7.41 (s, 1H), 7.30 (s, 1H), 3.95 (s, 3H), 3.91 (s, 3H); <sup>13</sup>C{<sup>1</sup>H} NMR (101 MHz, CDCl<sub>3</sub>) δ 194.9, 154.5, 149.8, 128.4, 121.8, 111.1, 92.8, 56.5, 56.1; HRMS (ESI) m/z [M+H]<sup>+</sup> calcd for C<sub>9</sub>H<sub>10</sub>O<sub>3</sub>I: 292.9670; found: 292.9667.

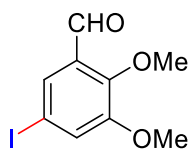

**5-iodo-2,3-dimethoxybenzaldehyde (10a)**<sup>2</sup>. Product **10a** was synthesized according to experimental procedure I and purified by column chromatography (petroleum ether : ethyl acetate= 15 : 1). white solid (254 mg, 0.87 mmol, 87% yield); mp 97–98 °C. <sup>1</sup>H NMR (400 MHz, CDCl<sub>3</sub>) δ 10.28 (s, 1H), 7.70 (d, *J* = 2.3 Hz, 1H), 7.36 (d, *J* = 2.1 Hz, 1H), 3.96 (s, 3H), 3.88 (s, 3H); <sup>13</sup>C{<sup>1</sup>H} NMR (101 MHz, CDCl<sub>3</sub>) δ 188.6, 153.8, 152.6, 130.9, 128.1, 126.6, 87.1, 62.4, 56.3; HRMS (ESI) m/z [M+Na]<sup>+</sup> calcd for C<sub>9</sub>H<sub>9</sub>O<sub>3</sub>NaI: 314.9489; found: 314.9499.

<sup>4</sup> La M, Liu D, Chen X, Zhang F L, Zhou Y. *Org. Lett.* **2021**, *23* (23), 9184-9188.

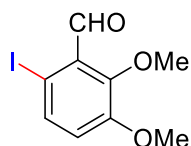

**6-iodo-2,3-dimethoxybenzaldehyde (10b)**<sup>4</sup>. Product **10b** was synthesized according to experimental procedure I and purified by column chromatography (petroleum ether : ethyl acetate= 20 : 1). white solid (35 mg, 0.12 mmol, 12% yield); mp 97–99 °C. <sup>1</sup>H NMR (400 MHz, CDCl<sub>3</sub>) δ 10.16 (s, 1H), 7.65 (d, *J* = 8.6 Hz, 1H), 6.81 (d, *J* = 8.6 Hz, 1H), 3.92 (s, 3H), 3.88 (s, 3H); <sup>13</sup>C{<sup>1</sup>H} NMR (101 MHz, CDCl<sub>3</sub>) δ 191.8, 153.8, 152.58, 136.5, 130.1, 118.2, 82.3, 62.5, 56.2; HRMS (ESI) *m/z* [M+Na]<sup>+</sup> calcd for C<sub>9</sub>H<sub>9</sub>O<sub>3</sub>NaI: 314.9489; found: 314.9501.

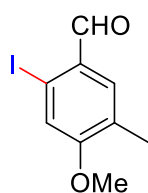

**2-iodo-4-methoxy-5-methylbenzaldehyde (11)**<sup>4</sup>. Product **11** was synthesized according to experimental procedure I and purified by column chromatography (petroleum ether : ethyl acetate= 15 : 1). yellow solid (232 mg, 0.84 mmol, 84% yield); mp 90–91 °C. <sup>1</sup>H NMR (400 MHz, CDCl<sub>3</sub>) δ 9.84 (s, 1H), 8.13 (d, *J* = 2.0 Hz, 1H), 7.68 (dd, *J* = 2.0, 0.9 Hz, 1H), 3.84 (s, 3H), 2.41 (s, 3H); <sup>13</sup>C{<sup>1</sup>H} NMR (101 MHz, CDCl<sub>3</sub>) δ 190.0, 163.1, 139.1, 134.0, 133.2, 132.8, 92.6, 60.3, 17.1; HRMS (ESI) *m/z* [M+H]<sup>+</sup> calcd for C<sub>9</sub>H<sub>10</sub>O<sub>2</sub>I: 276.9720; found: 276.9729.

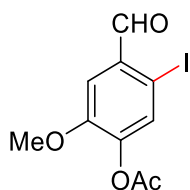

**4-formyl-5-iodo-2-methoxyphenyl acetate (12)**. Product **12** was synthesized according to experimental procedure I and purified by column chromatography (petroleum ether : ethyl acetate= 15 : 1). white solid (259 mg, 0.81 mmol, 81% yield); mp 95–96 °C. <sup>1</sup>H NMR (400 MHz, CDCl<sub>3</sub>) δ 9.95 (s, 1H), 7.61 (s, 1H), 7.51 (s, 1H), 3.88 (s, 3H), 2.33 (s, 3H). 3.88 (s, 3H), 2.33 (s, 3H); <sup>13</sup>C{<sup>1</sup>H} NMR (101 MHz, CDCl<sub>3</sub>) δ 194.9, 168.0, 152.1, 145.0, 134.2, 133.3, 112.7, 89.6, 56.2, 20.6; HRMS (ESI) *m/z* [M+Na]<sup>+</sup> calcd for C<sub>10</sub>H<sub>9</sub>O<sub>4</sub>INa: 342.9439; found: 342.9441.

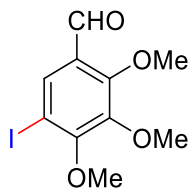

**5-iodo-2,3,4-trimethoxybenzaldehyde (13).** Product **13** was synthesized according to experimental procedure I and purified by column chromatography (petroleum ether : ethyl acetate= 15 : 1). yellow solid (251 mg, 0.78 mmol, 78% yield); mp 36–37 °C.  $^1\text{H}$  NMR (400 MHz,  $\text{CDCl}_3$ )  $\delta$  10.17 (s, 1H), 7.98 (s, 1H), 4.02 (s, 3H), 3.97 (s, 3H), 3.89 (s, 3H);  $^{13}\text{C}\{^1\text{H}\}$  NMR (101 MHz,  $\text{CDCl}_3$ )  $\delta$  187.7, 158.9, 157.9, 146.0, 132.6, 126.9, 85.9, 62.4, 61.2, 61.1; HRMS (ESI)  $m/z$   $[\text{M}+\text{Na}]^+$  calcd for  $\text{C}_{10}\text{H}_{11}\text{O}_4\text{NaI}$ : 344.9595; found: 344.9606.

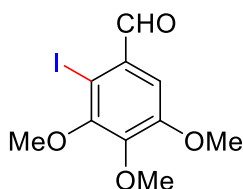

**2-iodo-3,4,5-trimethoxybenzaldehyde (14)**<sup>5</sup>. Product **14** was synthesized according to experimental procedure I and purified by column chromatography (petroleum ether : ethyl acetate= 15 : 1). yellow solid (306 mg, 0.95 mmol, 95% yield); mp 66–67 °C.  $^1\text{H}$  NMR (400 MHz,  $\text{CDCl}_3$ )  $\delta$  10.03 (s, 1H), 7.34 (s, 1H), 3.97 (s, 3H), 3.92 (s, 3H), 3.90 (s, 3H);  $^{13}\text{C}\{^1\text{H}\}$  NMR (101 MHz,  $\text{CDCl}_3$ )  $\delta$  195.3, 154.0, 153.0, 147.8, 130.5, 108.6, 91.6, 61.2, 61.0, 56.3; HRMS (ESI)  $m/z$   $[\text{M}+\text{Na}]^+$  calcd for  $\text{C}_{10}\text{H}_{11}\text{O}_4\text{NaI}$ : 344.9595; found: 344.9605.

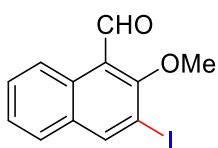

**3-iodo-2-methoxy-1-naphthaldehyde (15).** Product **15** was synthesized according to experimental procedure I and purified by column chromatography (petroleum ether : ethyl acetate= 40 : 1). white solid (243 mg, 0.78 mmol, 78% yield); mp 125–126 °C.  $^1\text{H}$  NMR (400 MHz,  $\text{CDCl}_3$ )  $\delta$  10.86 (s, 1H), 9.03 (d,  $J = 9.1$  Hz, 1H), 8.16 (d,  $J = 1.9$  Hz, 1H), 7.94 (d,  $J = 9.2$  Hz, 1H), 7.84 – 7.81 (m, 1H), 7.32 (d,  $J = 9.2$  Hz, 1H), 4.06 (s, 3H);  $^{13}\text{C}\{^1\text{H}\}$  NMR (101 MHz,  $\text{CDCl}_3$ )  $\delta$  191.7, 164.0, 138.2, 136.7, 136.4, 130.4,

<sup>5</sup> Nicolaus N, Strauss S, Neudörfel J M, Prokop A, Schmalz H G. *Org. Lett.* **2009**, *11* (2), 341-344.

130.2, 126.8, 116.6, 113.4, 89.9, 56.6; HRMS (ESI)  $m/z$   $[M+H]^+$  calcd for  $C_{12}H_{10}O_2I$ : 312.9720; found: 312.9733.

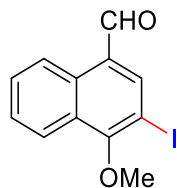

**3-iodo-4-methoxy-1-naphthaldehyde (16).** Product **16** was synthesized according to experimental procedure I and purified by column chromatography (petroleum ether : ethyl acetate= 40 : 1). yellow solid (175 mg, 0.56 mmol, 56% yield); mp 177–178 °C.  $^1H$  NMR (400 MHz,  $CDCl_3$ )  $\delta$  10.22 (s, 1H), 9.21 (dt,  $J$  = 8.6, 1.0 Hz, 1H), 8.25 (s, 1H), 8.17 (ddd,  $J$  = 8.3, 1.4, 0.7 Hz, 1H), 7.71 (ddd,  $J$  = 8.5, 6.9, 1.4 Hz, 1H), 7.62 (ddd,  $J$  = 8.3, 6.9, 1.3 Hz, 1H), 4.03 (s, 3H);  $^{13}C\{^1H\}$  NMR (101 MHz,  $CDCl_3$ )  $\delta$  191.3, 162.2, 146.5, 132.0, 129.7, 129.5, 128.7, 127.8, 125.4, 122.8, 85.3, 62.1; HRMS (ESI)  $m/z$   $[M+H]^+$  calcd for  $C_{12}H_{10}O_2I$ : 312.9720; found: 312.9733.

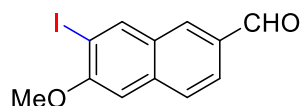

**7-iodo-6-methoxy-2-naphthaldehyde (17).** Product **17** was synthesized according to experimental procedure I and purified by column chromatography (petroleum ether : ethyl acetate= 30 : 1). yellow solid (193 mg, 0.62 mmol, 62% yield); mp 244–245 °C.  $^1H$  NMR (400 MHz,  $CDCl_3$ )  $\delta$  10.16 (s, 1H), 8.26 (d,  $J$  = 6.9 Hz, 2H), 8.00 (dd,  $J$  = 8.8, 4.8 Hz, 2H), 7.31 (d,  $J$  = 9.1 Hz, 1H), 4.09 (s, 3H);  $^{13}C\{^1H\}$  NMR (101 MHz,  $CDCl_3$ )  $\delta$  191.6, 159.1, 139.0, 134.4, 132.6, 132.4, 132.2, 128.8, 125.1, 113.4, 87.6, 57.2; HRMS (ESI)  $m/z$   $[M+H]^+$  calcd for  $C_{12}H_{10}O_2I$ : 312.9720; found: 312.9733.

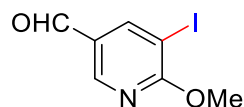

**5-iodo-6-methoxynicotinaldehyde (18).** Product **18** was synthesized according to experimental procedure I and purified by column chromatography (petroleum ether : ethyl acetate= 5 : 1). yellow solid (139 mg, 0.53 mmol, 53% yield); mp 142–143 °C.  $^1H$  NMR (400 MHz,  $CDCl_3$ )  $\delta$  9.54 (s, 1H), 8.45 (d,  $J$  = 2.3 Hz, 1H), 7.95 (d,  $J$  = 2.3 Hz, 1H), 3.70 (s, 3H);  $^{13}C\{^1H\}$  NMR (101 MHz,  $CDCl_3$ )  $\delta$  184.6, 160.2, 146.8, 145.2, 119.2, 92.9, 40.0; HRMS (ESI)  $m/z$   $[M+Na]^+$  calcd for  $C_7H_6NO_2NaI$ : 285.9336; found: 285.9349.

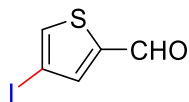

**4-iodothiophene-2-carbaldehyde (19).** Product **19** was synthesized according to experimental procedure I and purified by column chromatography (petroleum ether : ethyl acetate= 20 : 1). Yellow oil (174 mg, 0.73 mmol, 73% yield);  $^1\text{H}$  NMR (400 MHz,  $\text{CDCl}_3$ )  $\delta$  9.89 (d,  $J$  = 1.3 Hz, 1H), 7.80 (t,  $J$  = 1.3 Hz, 1H), 7.75 (d,  $J$  = 1.3 Hz, 1H);  $^{13}\text{C}\{^1\text{H}\}$  NMR (101 MHz,  $\text{CDCl}_3$ )  $\delta$  181.6, 145.0, 143.0, 137.8; HRMS (ESI)  $m/z$   $[\text{M}+\text{H}]^+$  calcd for  $\text{C}_5\text{H}_4\text{OSI}$ : 238.9023; found: 238.9028.

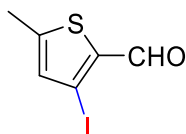

**3-iodo-5-methylthiophene-2-carbaldehyde (20).** Product **20** was synthesized according to experimental procedure I and purified by column chromatography (petroleum ether : ethyl acetate= 20: 1). yellow solid (202 mg, 0.80 mmol, 80% yield); mp 77–78 °C.  $^1\text{H}$  NMR (400 MHz,  $\text{CDCl}_3$ )  $\delta$  9.78 (s, 1H), 7.65 (s, 1H), 2.50 (s, 3H);  $^{13}\text{C}\{^1\text{H}\}$  NMR (101 MHz,  $\text{CDCl}_3$ )  $\delta$  181.5, 149.9, 144.0, 142.2, 82.0, 19.1; HRMS (ESI)  $m/z$   $[\text{M}+\text{H}]^+$  calcd for  $\text{C}_5\text{H}_6\text{OSI}$ : 252.9179; found: 252.9184.

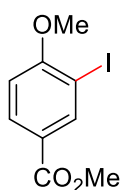

**Methyl 3-iodo-4-methoxybenzoate (21)**<sup>6</sup>. Product **21** was synthesized according to experimental procedure I and purified by column chromatography (petroleum ether : ethyl acetate= 5 : 1). white solid (274 mg, 0.94 mmol, 94% yield); mp 93-95 °C.  $^1\text{H}$  NMR (400 MHz,  $\text{CDCl}_3$ )  $\delta$  8.45 (d,  $J$  = 2.1 Hz, 1H), 8.02 (dd,  $J$  = 8.6, 2.1 Hz, 1H), 6.83 (d,  $J$  = 8.7 Hz, 1H), 3.94 (s, 3H), 3.89 (s, 3H);  $^{13}\text{C}\{^1\text{H}\}$  NMR (101 MHz,  $\text{CDCl}_3$ )  $\delta$  165.6, 161.6, 141.0, 131.7, 124.3, 110.0, 56.6, 52.2; HRMS (ESI)  $m/z$   $[\text{M}+\text{H}]^+$  calcd for  $\text{C}_9\text{H}_{10}\text{O}_3\text{I}$ : 292.9670; found: 292.9680.

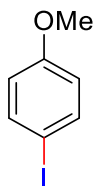

<sup>6</sup> Tu G, Ju G, Ji S J, Zhao Y. *Org. Lett.* **2022**, *24* (11), 2155-2159



**1-iodo-4-methoxybenzene (22)**<sup>7</sup>. Product **22** was synthesized according to experimental procedure I and purified by column chromatography (petroleum ether : ethyl acetate= 150 : 1). white oil (211 mg, 0.91 mmol, 91% yield); <sup>1</sup>H NMR (400 MHz, CDCl<sub>3</sub>) δ 7.61 – 7.50 (m, 2H), 6.71 – 6.64 (m, 2H), 3.78 (s, 3H); <sup>13</sup>C{<sup>1</sup>H} NMR (101 MHz, CDCl<sub>3</sub>) δ 159.4, 138.2, 116.8, 82.7, 55.3; HRMS (ESI) m/z [M+Na]<sup>+</sup> calcd for C<sub>7</sub>H<sub>7</sub>ONaI: 256.9434; found: 256.9444.

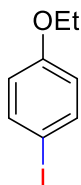

**1-ethoxy-4-iodobenzene (23)**<sup>8</sup>. Product **23** was synthesized according to experimental procedure I and purified by column chromatography (petroleum ether : ethyl acetate= 150: 1). white oil (206 mg, 0.83 mmol, 83% yield); <sup>1</sup>H NMR (400 MHz, CDCl<sub>3</sub>) δ 7.54 (d, *J* = 8.9 Hz, 2H), 6.67 (d, *J* = 8.9 Hz, 2H), 3.99 (q, *J* = 7.0 Hz, 2H), 1.40 (t, *J* = 7.0 Hz, 3H); <sup>13</sup>C{<sup>1</sup>H} NMR (101 MHz, CDCl<sub>3</sub>) δ 158.8, 138.2, 116.9, 82.5, 63.6, 14.8; HRMS (ESI) m/z [M+Na]<sup>+</sup> calcd for C<sub>8</sub>H<sub>9</sub>ONaI: 270.9591; found: 270.9598.

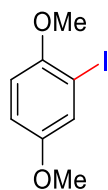

**2-iodo-1,4-dimethoxybenzene (24)**<sup>9</sup>. Product **24** was synthesized according to experimental procedure I and purified by column chromatography (petroleum ether : ethyl acetate= 150 : 1). yellow oli (219 mg, 0.83 mmol, 83% yield).<sup>1</sup>H NMR (400 MHz, CDCl<sub>3</sub>) δ 7.34 (d, *J* = 3.0 Hz, 1H), 6.87 (dd, *J* = 8.9, 3.0 Hz, 1H), 6.76 (d, *J* = 9.0 Hz, 1H), 3.83 (s, 3H), 3.76 (s, 3H); <sup>13</sup>C{<sup>1</sup>H} NMR (101 MHz, CDCl<sub>3</sub>) δ 154.2, 152.7, 124.8, 114.8, 111.6, 86.0, 57.0, 56.0. HRMS (ESI) m/z [M+H]<sup>+</sup> calcd for C<sub>8</sub>H<sub>10</sub>O<sub>2</sub>I: 264.9720; found: 264.9722.

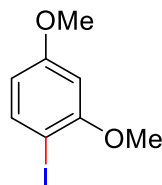

<sup>7</sup> Bergström M, Suresh G, Naidu V R, Unelius C R. *Eur. J. Org. Chem.* **2017**, 2017 (22), 3234-3239.

<sup>8</sup> Tale R H, Toradmal G K, Gopula V B, Rodge A H, Pawar R P, Patil K M. *Tetrahedron Lett.* **2015**, 56 (21), 2699-2703.

<sup>9</sup> Wu Z, Wei F, Wan B, Zhang Y. *J. Am. Chem. Soc.* **2021**, 143 (12), 4524-4530.

**1-iodo-2,4-dimethoxybenzene (25)**<sup>10</sup>. Product **25** was synthesized according to experimental procedure I and purified by column chromatography (petroleum ether : ethyl acetate= 100 : 1). yellow oil (230mg, 0.87 mmol, 87 % yield). <sup>1</sup>H NMR (400 MHz, CDCl<sub>3</sub>) δ 7.61 (d, *J* = 8.6 Hz, 1H), 6.42 (d, *J* = 2.6 Hz, 1H), 6.31 (dd, *J* = 8.6, 2.7 Hz, 1H), 3.84 (s, 3H), 3.79 (s, 3H); <sup>13</sup>C{<sup>1</sup>H} NMR (101 MHz, CDCl<sub>3</sub>) δ 161.4, 158.8, 139.2, 107.0, 99.2, 74.8, 56.3, 55.6. HRMS (ESI) *m/z* [M+H]<sup>+</sup> calcd for C<sub>8</sub>H<sub>10</sub>O<sub>2</sub>I: 264.9720; found: 264.9716.

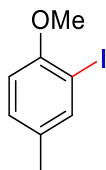

**2-iodo-1-methoxy-4-methylbenzene (26)**<sup>7</sup>. Product **26** was synthesized according to experimental procedure I and purified by column chromatography (petroleum ether : ethyl acetate= 100 : 1). yellow oil (211 mg, 0.85 mmol, 85% yield); <sup>1</sup>H NMR (400 MHz, CDCl<sub>3</sub>) δ 7.60 (d, *J* = 1.4 Hz, 1H), 7.10 (ddd, *J* = 8.3, 2.1, 0.8 Hz, 1H), 6.72 (d, *J* = 8.3 Hz, 1H), 3.85 (s, 3H), 2.26 (s, 3H); <sup>13</sup>C{<sup>1</sup>H} NMR (101 MHz, CDCl<sub>3</sub>) δ 156.0, 139.8, 132.0, 130.0, 110.8, 85.8, 56.4, 20.0; HRMS (ESI) *m/z* [M+Na]<sup>+</sup> calcd for C<sub>8</sub>H<sub>9</sub>ONaI: 270.9591; found: 270.9600.

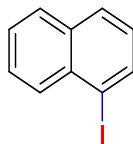

**1-iodonaphthalene (27)**<sup>11</sup>. Product **27** was synthesized according to experimental procedure I and purified by column chromatography (petroleum ether : ethyl acetate= 200: 1). white oil (191 mg, 0.75 mmol, 75% yield); <sup>1</sup>H NMR (400 MHz, CDCl<sub>3</sub>) δ 8.13 – 8.07 (m, 2H), 7.85 (dd, *J* = 8.2, 1.1 Hz, 1H), 7.78 (dd, *J* = 8.0, 1.4 Hz, 1H), 7.59 (ddd, *J* = 8.4, 6.9, 1.5 Hz, 1H), 7.52 (ddd, *J* = 8.0, 6.8, 1.4 Hz, 1H), 7.19 (dd, *J* = 8.2, 7.3 Hz, 1H); <sup>13</sup>C{<sup>1</sup>H} NMR (101 MHz, CDCl<sub>3</sub>) δ 137.5, 134.4, 134.2, 132.2, 129.0, 128.6, 127.7, 126.9, 126.8, 99.6; HRMS (ESI) *m/z* [M+Na]<sup>+</sup> calcd for C<sub>10</sub>H<sub>7</sub>NaI: 276.9485; found: 276.9488.

<sup>10</sup> Bedrač L, Iskra J. *Tetrahedron Lett.* **2012**, 53 (41), 5555-5558.

<sup>11</sup> Iwai K, Nishiguchi N, Nishiwaki N. *J. Org. Chem.* **2023**, 88 (13), 9409-9412.

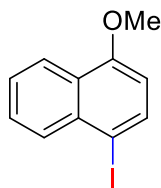

**1-iodo-4-methoxynaphthalene (28)**<sup>12</sup>. Product **28** was synthesized according to experimental procedure I and purified by column chromatography (petroleum ether : ethyl acetate= 100: 1). yellow oli (224mg, 0.79 mmol, 79 % yield). <sup>1</sup>H NMR (400 MHz, CDCl<sub>3</sub>) δ 8.27 – 8.22 (m, 1H), 8.05 – 8.02 (m, 1H), 7.95 (d, *J* = 8.2 Hz, 1H), 7.60 (ddd, *J* = 8.4, 6.9, 1.4 Hz, 1H), 7.52 (ddd, *J* = 8.2, 6.9, 1.3 Hz, 1H), 6.58 (d, *J* = 8.2 Hz, 1H), 3.98 (s, 3H). <sup>13</sup>C{<sup>1</sup>H} NMR (101 MHz, CDCl<sub>3</sub>) δ 156.3, 136.9, 134.7, 131.8, 128.2, 126.6, 126.0, 122.5, 105.6, 88.2, 55.7; HRMS (ESI) *m/z* [M+H]<sup>+</sup> calcd for C<sub>11</sub>H<sub>10</sub>OI: 284.9771; found: 284.9778.

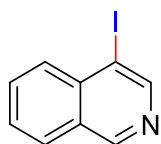

**4-iodoisoquinoline (29)**<sup>13</sup>. Product **29** was synthesized according to experimental procedure I and purified by column chromatography (petroleum ether : ethyl acetate= 15 : 1). white solid (206mg, 0.81 mmol, 81% yield); mp 94–95 °C. <sup>1</sup>H NMR (400 MHz, CDCl<sub>3</sub>) δ 9.14 (s, 1H), 8.94 (s, 1H), 8.00 (dd, *J* = 8.5, 1.1 Hz, 1H), 7.90 (dd, *J* = 8.2, 1.1 Hz, 1H), 7.80 (ddd, *J* = 8.4, 6.9, 1.3 Hz, 1H), 7.67 (ddd, *J* = 8.1, 6.9, 1.1 Hz, 1H); <sup>13</sup>C{<sup>1</sup>H} NMR (101 MHz, CDCl<sub>3</sub>) δ 152.6, 151.0, 137.2, 132.0, 130.8, 129.8, 128.4, 128.2, 96.8; HRMS (ESI) *m/z* [M+H]<sup>+</sup> calcd for C<sub>9</sub>H<sub>7</sub>NI: 255.9618; found: 255.9628.

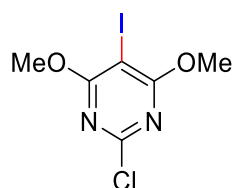

**2-chloro-5-iodo-4,6-dimethoxypyrimidine (30)**. Product **30** was synthesized according to experimental procedure I and purified by column chromatography (petroleum ether : ethyl acetate= 20: 1). white solid (237 mg, 0.79 mmol, 79% yield); mp 183–185 °C. <sup>1</sup>H NMR (400 MHz, CDCl<sub>3</sub>) δ 4.03 (s, 6H); <sup>13</sup>C{<sup>1</sup>H} NMR (101 MHz, CDCl<sub>3</sub>) δ 170.1, 159.1, 59.6, 56.1; HRMS (ESI) *m/z* [M+H]<sup>+</sup> calcd for C<sub>6</sub>H<sub>7</sub>Cl<sub>2</sub>N<sub>2</sub>O<sub>2</sub>: 300.9235; found: 300.9230.

<sup>12</sup> Racys D T, Sharif S A I, Pimlott S L, Sutherland A. *J. Org. Chem.* **2016**, 81 (3), 772-780.

<sup>13</sup> Sun K, Lv Y, Wang J, Sun J, Liu L, Jia M, Liu X, Li Z, Wang X. *Org. Lett.* **2015**, 17 (18), 4408-4411.

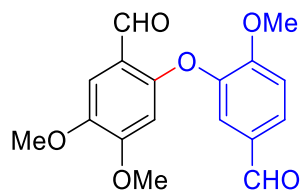

**2-(2-formyl-6-methoxyphenoxy)-4,5-dimethoxybenzaldehyde (Hernandial)<sup>4</sup>.** Product **Hernandial** was synthesized according to experimental procedure II and purified by column chromatography (petroleum ether : ethyl acetate= 15 : 1). White solid (155 mg, 0.49 mmol, 49% yield); mp 138-140 °C <sup>1</sup>H NMR (400 MHz, CDCl<sub>3</sub>) δ 10.28 (s, 1H), 9.83 (s, 1H), 7.69-7.66 (m, 1H), 7.40 (s, 1H), 7.39 (d, *J* = 2.0 Hz, 1H), 7.13 (d, *J* = 8.4 Hz, 1H), 6.39 (s, 1H), 3.98 (s, 3H), 3.94 (s, 3H), 3.81 (s, 3H); <sup>13</sup>C{<sup>1</sup>H} NMR (101 MHz, CDCl<sub>3</sub>) δ 190.1, 187.6, 155.6, 155.6, 154.7, 147.2, 146.3, 130.2, 128.6, 120.0, 118.0, 112.1, 108.5, 102.3, 56.4, 56.3; HRMS (ESI) *m/z* [M+Na]<sup>+</sup> calcd for C<sub>17</sub>H<sub>16</sub>O<sub>6</sub>Na: 339.0840; found: 339.0846.

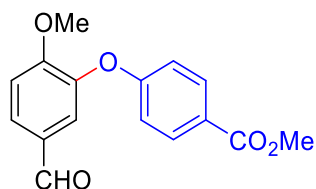

**Methyl 4(5-formyl-2-methoxyphenoxy)benzoate (Aristogin A)<sup>14</sup>.** Product **Aristogin A** was synthesized according to experimental procedure II and purified by column chromatography (petroleum ether : ethyl acetate= 8 : 1). white solid (232 mg, 0.81 mmol, 81% yield); mp 118-120 °C <sup>1</sup>H NMR (400 MHz, CDCl<sub>3</sub>) δ 9.87 (s, 1H), 8.00 (d, *J* = 8.5 Hz, 2H), 7.75 (dd, *J* = 8.4, 2.0 Hz, 1H), 7.59 (d, *J* = 2.0 Hz, 1H), 7.13 (s, 1H), 6.93 (d, *J* = 8.5 Hz, 2H), 3.90 (s, 6H); <sup>13</sup>C{<sup>1</sup>H} NMR (101 MHz, CDCl<sub>3</sub>) δ 190.1, 166.6, 161.3, 156.8, 144.4, 131.7, 130.4, 129.2, 124.7, 121.9, 116.3, 112.4, 56.3, 52.1; HRMS (ESI) *m/z* [M+Na]<sup>+</sup> calcd for C<sub>16</sub>H<sub>14</sub>O<sub>5</sub>Na: 309.0734; found: 309.0740.

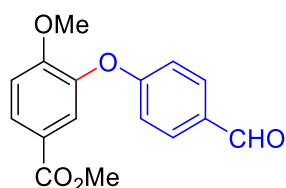

**Methyl 3-(4-formylphenoxy)-4-methoxybenzoate (Aristogin B)<sup>14</sup>.** Product **Aristogin B** was synthesized according to experimental procedure II and purified by column chromatography (petroleum ether : ethyl acetate= 8 : 1). white solid (166 mg, 0.58 mmol, 58% yield); mp 64-66 °C <sup>1</sup>H NMR (400 MHz, CDCl<sub>3</sub>) δ 9.91 (s, 1H), 7.97 (dd, *J* = 8.6, 2.1 Hz, 1H), 7.83 (d, *J* = 8.4 Hz, 2H), 7.78 (d, *J* = 2.1 Hz,

<sup>14</sup> Jung N, Bräse, S. *Eur. J. Org. Chem.* **2009**, 2009 (26), 4494-4502.

1H), 7.06 (d,  $J = 8.6$  Hz, 1H), 6.99 (d,  $J = 8.3$  Hz, 2H), 3.88 (s, 3H), 3.86 (s, 3H);  $^{13}\text{C}\{^1\text{H}\}$  NMR (101 MHz,  $\text{CDCl}_3$ )  $\delta$  190.8, 166.2, 163.0, 155.6, 142.6, 132.0, 131.2, 128.5, 123.8, 123.4, 116.4, 112.2, 56.1, 52.2; HRMS (ESI)  $m/z$   $[\text{M}+\text{Na}]^+$  calcd for  $\text{C}_{17}\text{H}_{16}\text{O}_6\text{Na}$ : 309.0734; found: 309.0742.

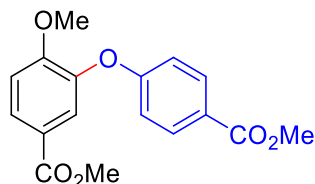

**Methyl 4-methoxy-3-(4-(methoxycarbonyl)phenoxy)benzoate (Aristogin C)**<sup>14</sup>. Product **Aristogin C** was synthesized according to experimental procedure II and purified by thin-layer chromatography (petroleum ether : ethyl acetate = 3 : 1). yellow solid (167 mg, 0.53 mmol, 53% yield); mp 93-94 °C  $^1\text{H}$  NMR (400 MHz,  $\text{CDCl}_3$ )  $\delta$  7.98 (d,  $J = 8.8$  Hz, 2H), 7.94 (dd,  $J = 8.6, 2.1$  Hz, 1H), 7.74 (d,  $J = 2.1$  Hz, 1H), 7.04 (d,  $J = 8.6$  Hz, 1H), 6.91 (d,  $J = 8.8$  Hz, 2H), 3.89 (s, 3H), 3.87 (s, 3H), 3.86 (s, 3H);  $^{13}\text{C}\{^1\text{H}\}$  NMR (101 MHz,  $\text{CDCl}_3$ )  $\delta$  166.7, 166.2, 161.7, 155.6, 143.1, 131.6, 128.2, 124.4, 123.4, 123.3, 116.0, 112.1, 56.1, 52.1, 52.0; HRMS (ESI)  $m/z$   $[\text{M}+\text{Na}]^+$  calcd for  $\text{C}_{17}\text{H}_{16}\text{O}_6\text{Na}$ : 339.0840; found: 339.0852.

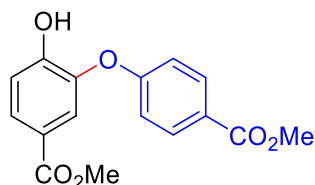

**Methyl 4-hydroxy-3-(4-(methoxycarbonyl)phenoxy)benzoate (Aristogin D)**<sup>14</sup>. Product **Aristogin D** was synthesized according to experimental procedure III and purified by thin-layer chromatography (petroleum ether : ethyl acetate = 5 : 1). white solid (9.1 mg, 0.03 mmol, 81% yield); mp 93-94 °C  $^1\text{H}$  NMR (400 MHz,  $\text{CDCl}_3$ )  $\delta$  8.02 (d,  $J = 8.4$  Hz, 2H), 7.83 (dd,  $J = 8.6, 2.0$  Hz, 1H), 7.63 (s, 1H), 7.10 (d,  $J = 8.5$  Hz, 1H), 7.03 (d,  $J = 8.5$  Hz, 2H), 6.15 (s, 1H), 3.91 (s, 3H), 3.84 (s, 3H);  $^{13}\text{C}\{^1\text{H}\}$  NMR (101 MHz,  $\text{CDCl}_3$ )  $\delta$  166.4, 166.1, 160.4, 151.9, 142.1, 132.0, 127.8, 125.7, 123.2, 121.2, 117.2, 116.5, 52.2, 52.1; HRMS (ESI)  $m/z$   $[\text{M}+\text{Na}]^+$  calcd for  $\text{C}_{16}\text{H}_{14}\text{O}_6\text{Na}$ : 325.0683; found: 325.0694.

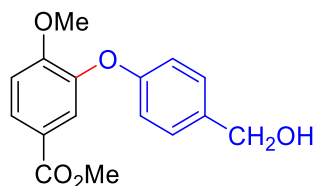

**Methyl 3-(4-(hydroxymethyl)phenoxy)-4-methoxybenzoate (Aristogin E)<sup>15</sup>.** Product **Aristogin E** was synthesized according to experimental procedure IV and purified by thin-layer chromatography (petroleum ether : ethyl acetate= 5 : 1). yellow oil (30 mg, 0.105 mmol, 62% yield); <sup>1</sup>H NMR (400 MHz, CDCl<sub>3</sub>) δ 7.86 (dd, *J* = 8.6, 2.1 Hz, 1H), 7.62 (d, *J* = 2.1 Hz, 1H), 7.31 (d, *J* = 8.6 Hz, 2H), 7.02 (d, *J* = 8.6 Hz, 1H), 6.94 (d, *J* = 8.6 Hz, 2H), 4.66 (s, 2H), 3.90 (s, 3H), 3.85 (s, 3H); <sup>13</sup>C {<sup>1</sup>H} NMR (101 MHz, CDCl<sub>3</sub>) δ 166.4, 157.0, 155.2, 144.8, 135.5, 128.7, 127.0, 123.1, 121.8, 117.6, 111.8, 64.9, 56.1, 52.0; HRMS (ESI) *m/z* [M+Na]<sup>+</sup> calcd for C<sub>16</sub>H<sub>16</sub>O<sub>5</sub>Na: 297.0734; found: 311.0899.

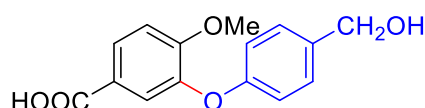

**3-(4-(hydroxymethyl)phenoxy)-4-methoxybenzoic acid (Aristogin F)<sup>14</sup>.** Product **Aristogin F** was synthesized according to experimental procedure IV and purified by thin-layer chromatography (petroleum ether : ethyl acetate= 3 : 1). yellow oil (16 mg, 0.06 mmol, 58% yield); <sup>1</sup>H NMR (400 MHz, DMSO) δ 7.78 (dd, *J* = 8.5, 2.1 Hz, 1H), 7.40 (d, *J* = 2.1 Hz, 1H), 7.30 (d, *J* = 8.2 Hz, 2H), 7.25 (d, *J* = 8.6 Hz, 1H), 6.89 (d, *J* = 8.6 Hz, 2H), 4.46 (s, 2H), 3.85 (s, 3H); <sup>13</sup>C {<sup>1</sup>H} NMR (101 MHz, DMSO) δ 167.1, 156.1, 155.0, 144.8, 137.8, 128.7, 127.1, 123.9, 121.0, 117.5, 113.2, 62.9, 56.4; HRMS (ESI) *m/z* [M+Na]<sup>+</sup> calcd for C<sub>16</sub>H<sub>14</sub>O<sub>5</sub>Na: 297.0734; found: 309.0742.

<sup>15</sup> Morin É, Raymond M, Dubart A, Collins S K. *Org. Lett.* **2017**, 19 (11), 2889-2892.

## 4. $^1\text{H}$ NMR and $^{13}\text{C}$ NMR spectra

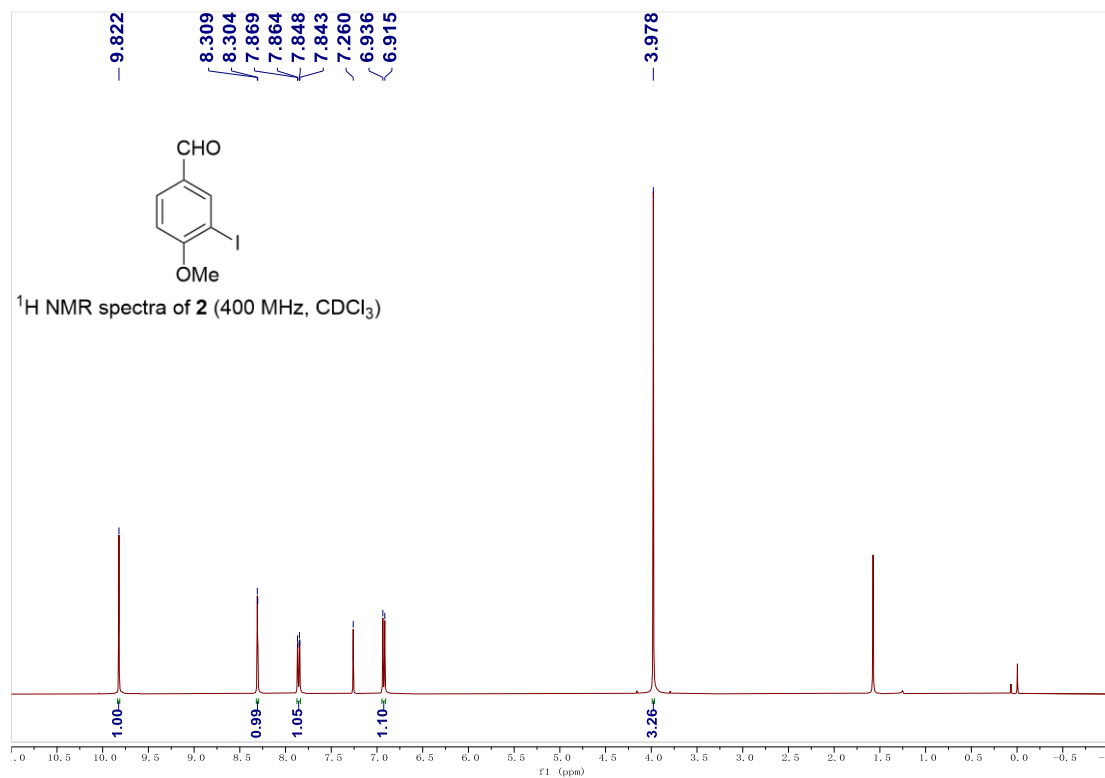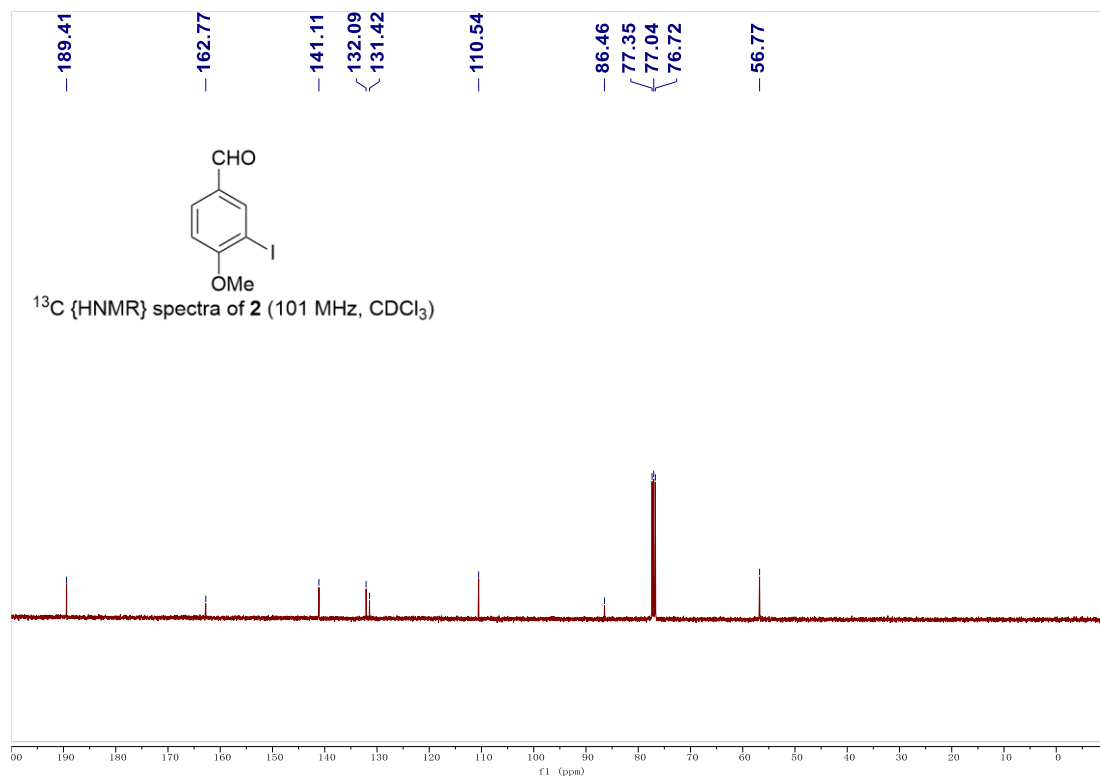

## Single Mass Analysis

Tolerance = 5.0 mDa / DBE: min = -1.5, max = 50.0

Element prediction: Off

Number of isotope peaks used for i-FIT = 3

Monoisotopic Mass, Even Electron Ions

79 formula(e) evaluated with 1 results within limits (up to 50 best isotopic matches for each mass)

Elements Used:

C: 8-8 H: 8-8 N: 0-10 O: 0-100 Na: 0-1 I: 1-7

12

240405-1-2 11 (0.076)

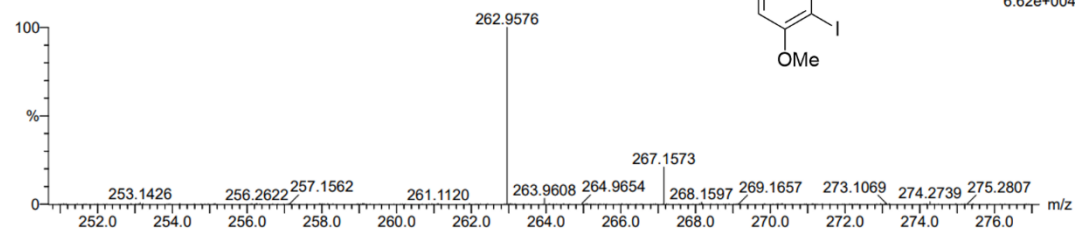

Minimum: -1.5  
Maximum: 5.0 10.0 50.0

| Mass     | Calc. Mass | mDa | PPM | DBE | i-FIT | Norm | Conf (%) | Formula    |
|----------|------------|-----|-----|-----|-------|------|----------|------------|
| 262.9576 | 262.9569   | 0.7 | 2.7 | 4.5 | 206.7 | n/a  | n/a      | C8 H8 O2 I |

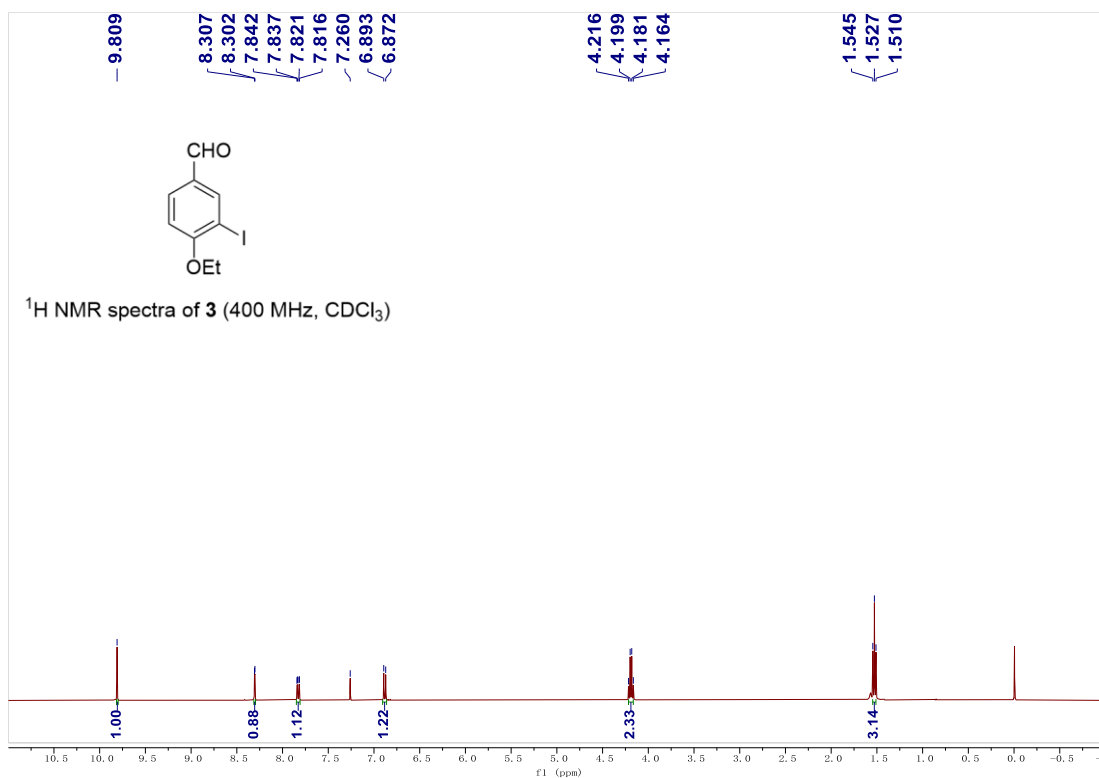



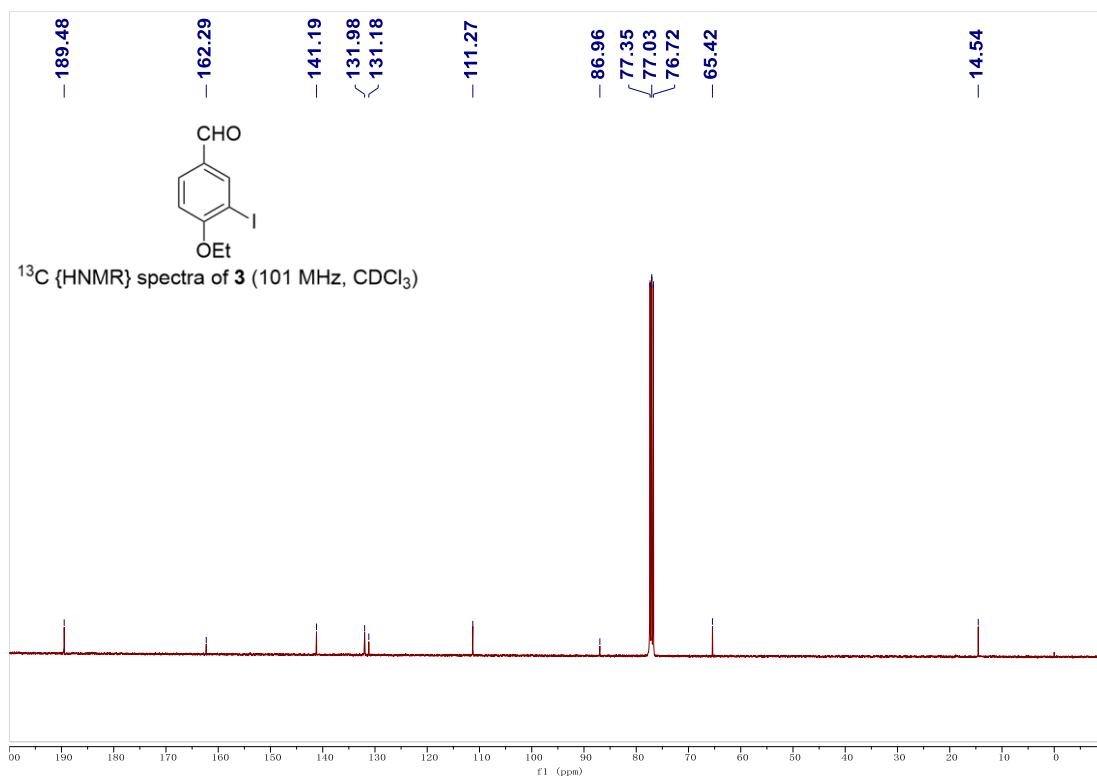

### Elemental Composition Report

Page 1

#### Single Mass Analysis

Tolerance = 5.0 mDa / DBE: min = -1.5, max = 50.0  
 Element prediction: Off  
 Number of isotope peaks used for i-FIT = 3

#### Monoisotopic Mass, Even Electron Ions

99 formula(e) evaluated with 1 results within limits (up to 50 best isotopic matches for each mass)

Elements Used:

C: 9-9 H: 10-10 N: 0-10 O: 0-100 Na: 0-1 I: 1-7

12  
 240405-1-3 11 (0.076)

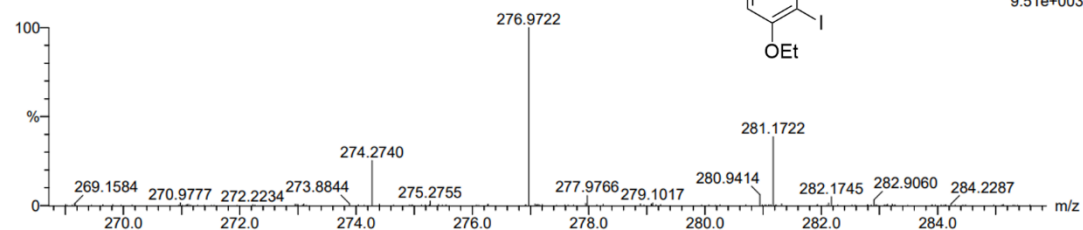

1: TOF MS ES+  
 9.51e+003

Minimum: -1.5  
 Maximum: 5.0 10.0 50.0

| Mass     | Calc. Mass | mDa  | PPM  | DBE | i-FIT | Norm | Conf(%) | Formula     |
|----------|------------|------|------|-----|-------|------|---------|-------------|
| 276.9722 | 276.9725   | -0.3 | -1.1 | 4.5 | 167.9 | n/a  | n/a     | C9 H10 O2 I |

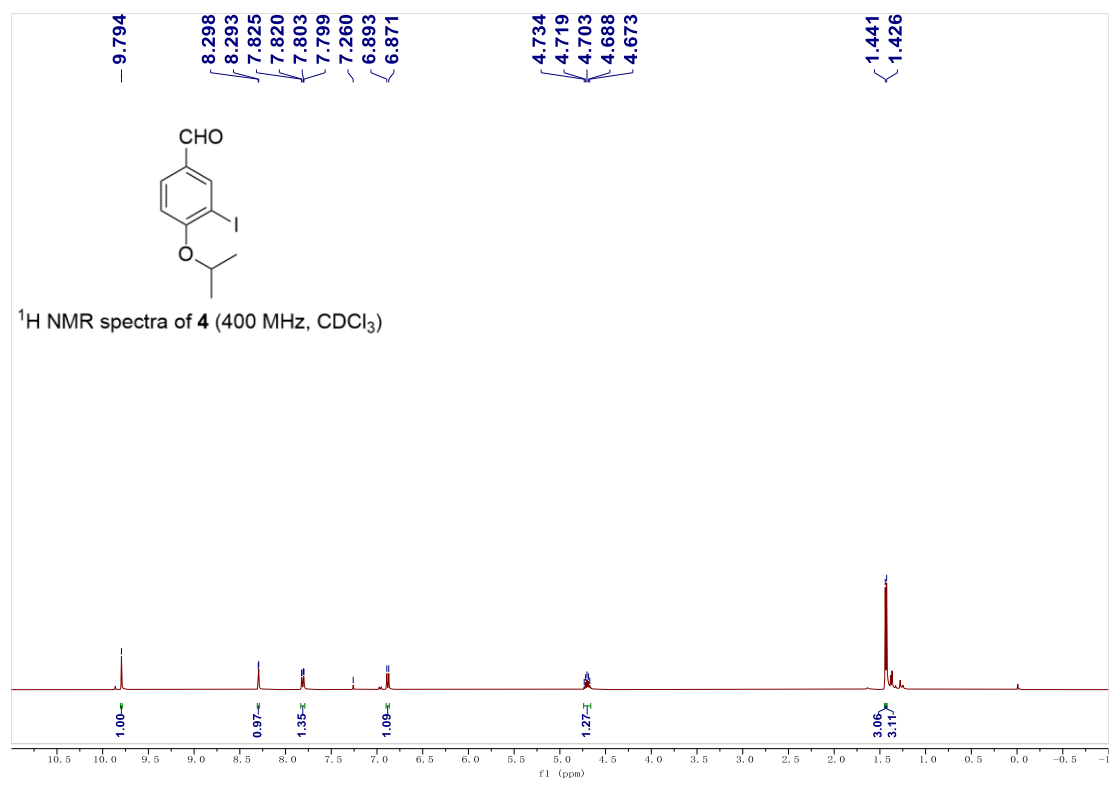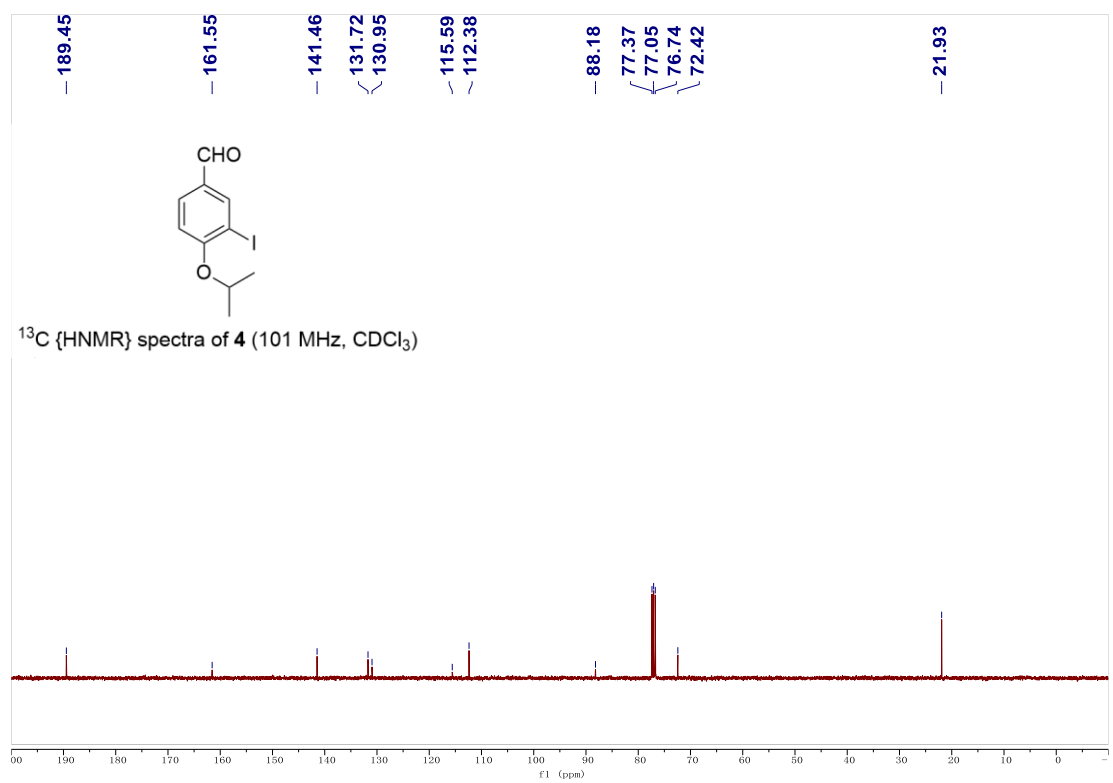

## Elemental Composition Report

Page 1

### Single Mass Analysis

Tolerance = 5.0 mDa / DBE: min = -1.5, max = 50.0

Element prediction: Off

Number of isotope peaks used for i-FIT = 3

Monoisotopic Mass, Even Electron Ions

162 formula(e) evaluated with 1 results within limits (up to 50 best isotopic matches for each mass)

Elements Used:

C: 10-10 H: 12-12 N: 0-200 O: 0-100 Na: 0-2 I: 1-2

6

231208-3-9 25 (0.121)

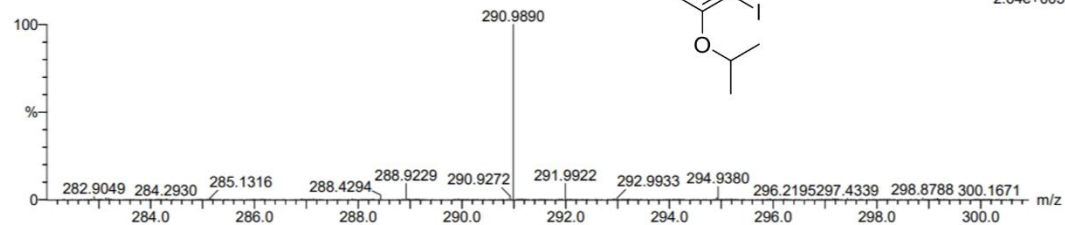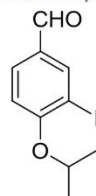

1: TOF MS ES+  
2.64e+005

Minimum: -1.5  
Maximum: 5.0 10.0 50.0

| Mass     | Calc. Mass | mDa | PPM | DBE | i-FIT | Norm | Conf (%) | Formula      |
|----------|------------|-----|-----|-----|-------|------|----------|--------------|
| 290.9890 | 290.9882   | 0.8 | 2.7 | 4.5 | 947.1 | n/a  | n/a      | C10 H12 O2 I |

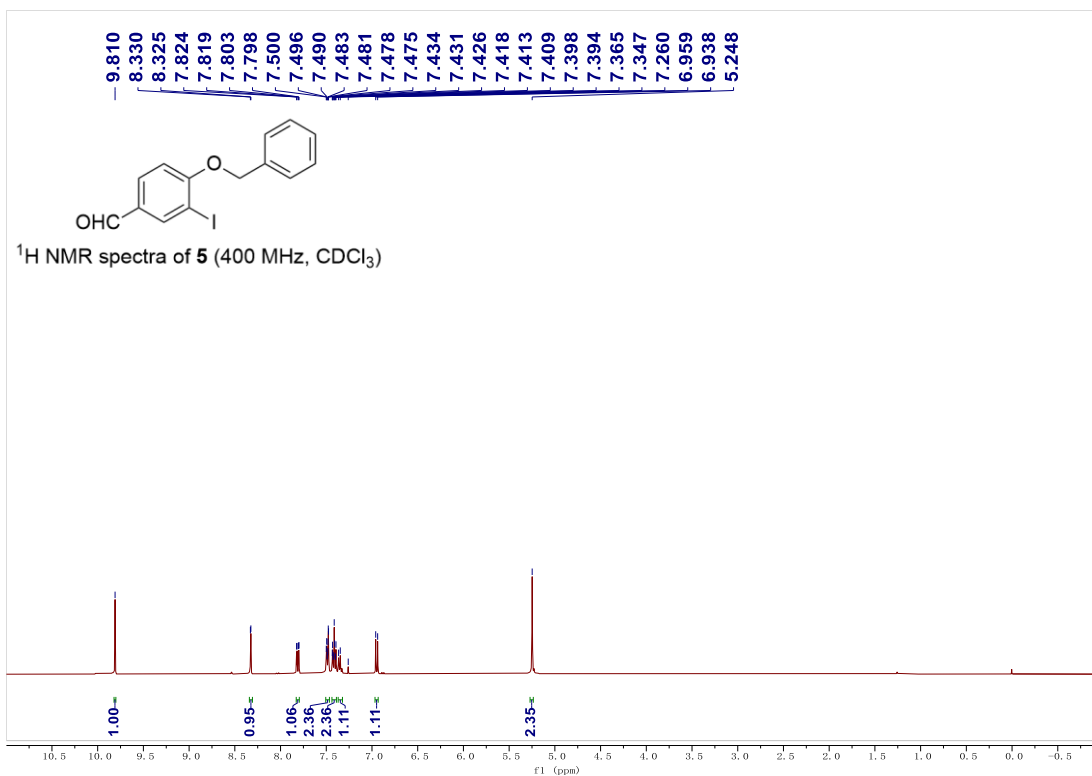

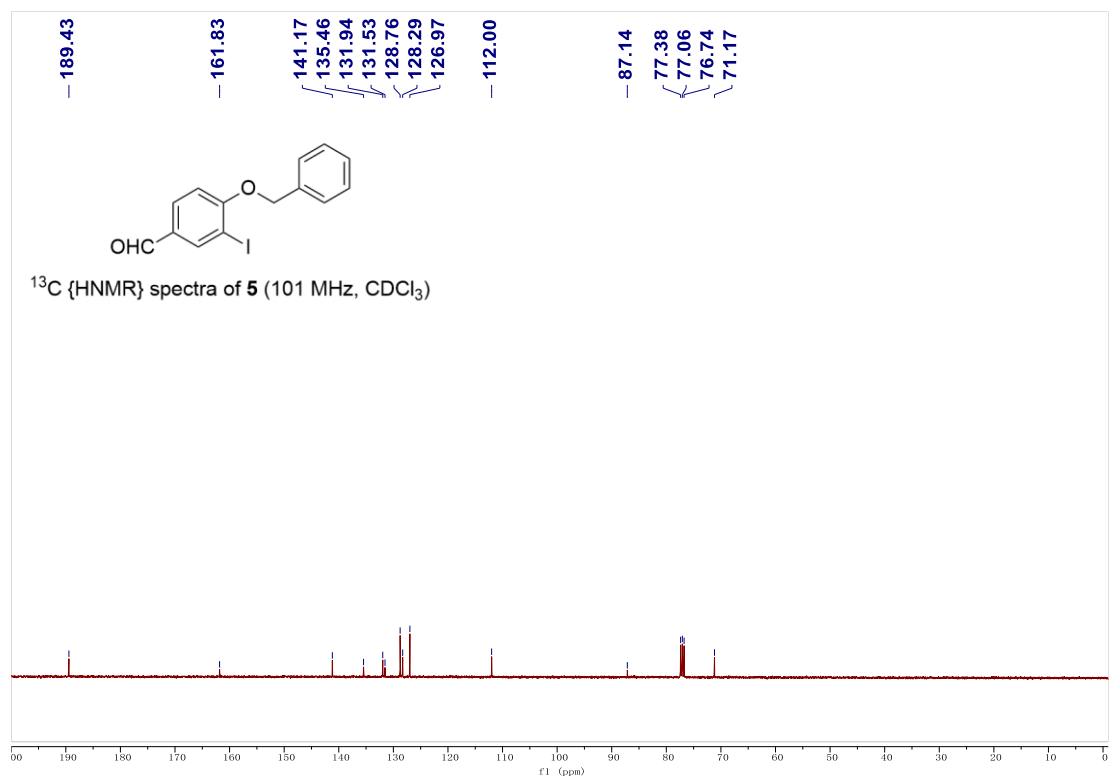

### Elemental Composition Report

Page 1

#### Single Mass Analysis

Tolerance = 5.0 mDa / DBE: min = -1.5, max = 50.0

Element prediction: Off

Number of isotope peaks used for i-FIT = 3

Monoisotopic Mass, Even Electron Ions

17 formula(e) evaluated with 1 results within limits (up to 50 best isotopic matches for each mass)

Elements Used:

C: 14-14 H: 12-12 O: 0-100 I: 1-2

6

231208-3-1 16 (0.083)

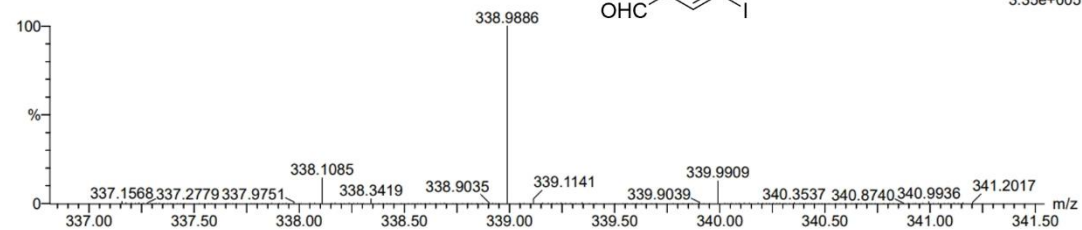

1: TOF MS ES+  
3.35e+005

Minimum: -1.5

Maximum: 5.0 10.0 50.0

| Mass     | Calc. Mass | mDa | PPM | DBE | i-FIT | Norm | Conf(%) | Formula      |
|----------|------------|-----|-----|-----|-------|------|---------|--------------|
| 338.9886 | 338.9882   | 0.4 | 1.2 | 8.5 | 894.9 | n/a  | n/a     | C14 H12 O2 I |

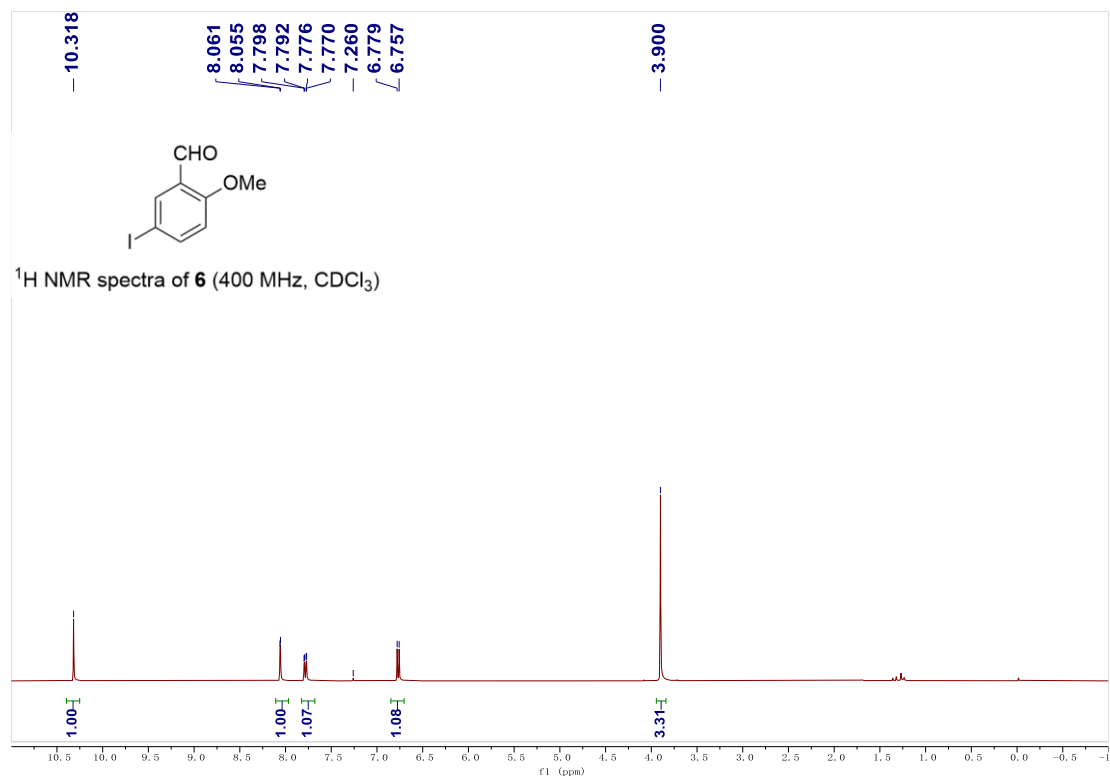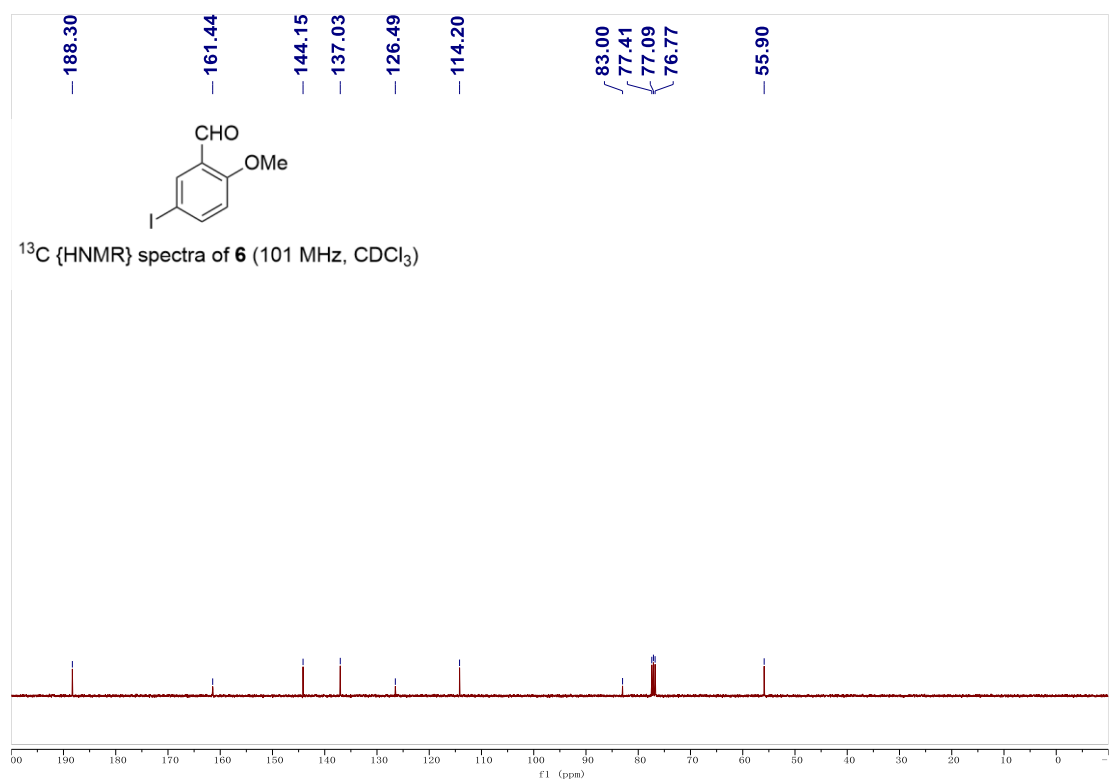

Elemental Composition Report

Single Mass Analysis

Tolerance = 5.0 mDa / DBE: min = -1.5, max = 50.0

Element prediction: Off

Number of isotope peaks used for i-FIT = 3

Monoisotopic Mass, Even Electron Ions

79 formula(e) evaluated with 1 results within limits (up to 50 best isotopic matches for each mass)

Elements Used:

C: 8-8 H: 8-8 N: 0-10 O: 0-100 Na: 0-1 I: 1-7

12  
240405-1-6 11 (0.076)

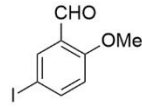

1: TOF MS ES+  
1.20e+04

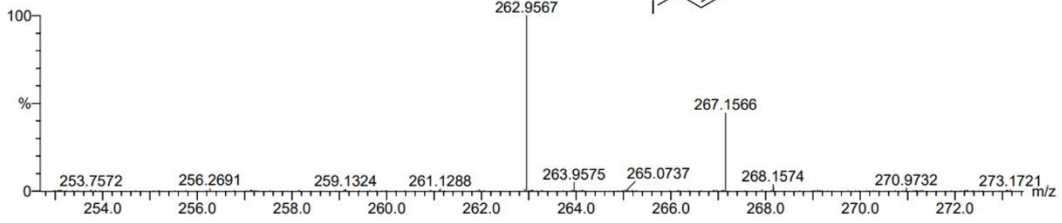

Minimum: -1.5  
Maximum: 5.0 10.0 50.0

| Mass     | Calc. Mass | mDa  | PPM  | DBE | i-FIT | Norm | Conf(%) | Formula    |
|----------|------------|------|------|-----|-------|------|---------|------------|
| 262.9567 | 262.9569   | -0.2 | -0.8 | 4.5 | 183.6 | n/a  | n/a     | C8 H8 O2 I |

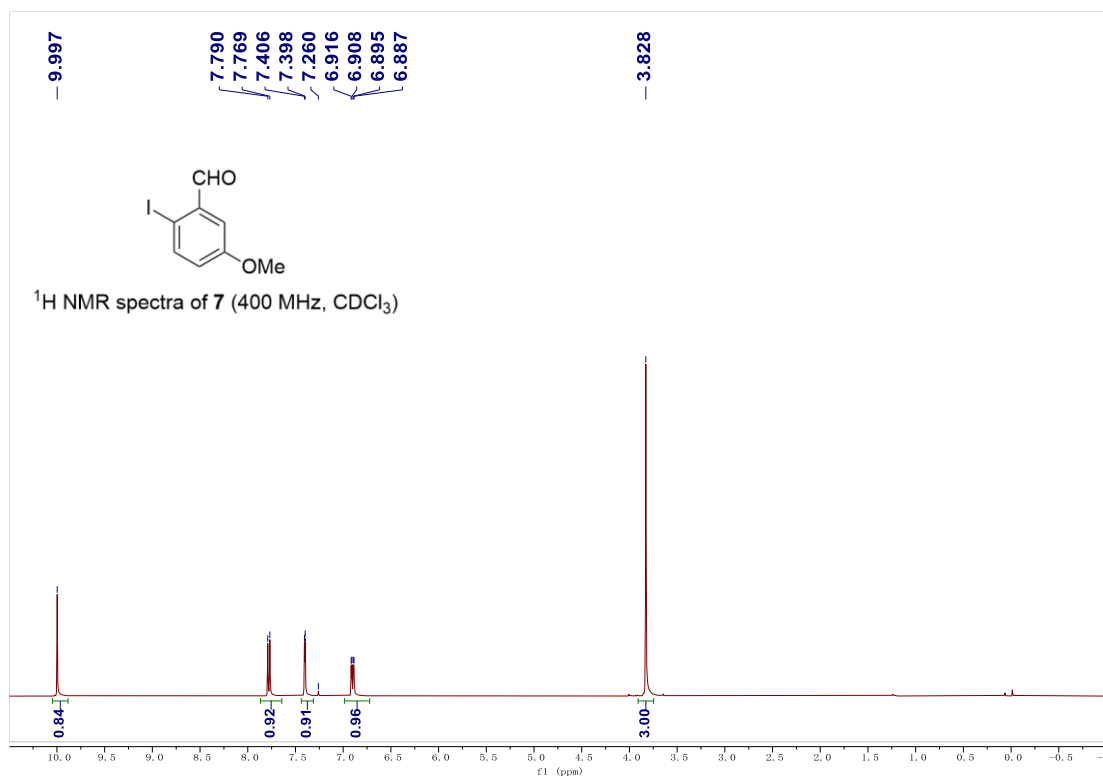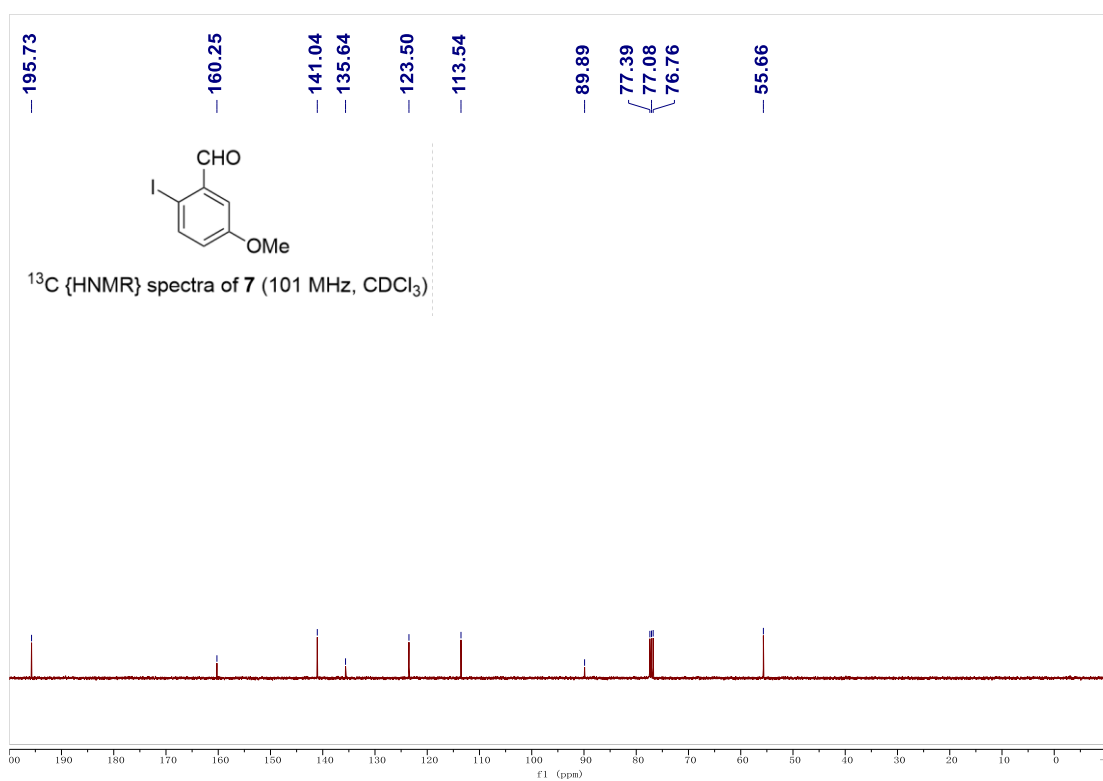

## Elemental Composition Report

Page 1

### Single Mass Analysis

Tolerance = 5.0 mDa / DBE: min = -1.5, max = 50.0

Element prediction: Off

Number of isotope peaks used for i-FIT = 3

Monoisotopic Mass, Even Electron Ions

79 formula(e) evaluated with 1 results within limits (up to 50 best isotopic matches for each mass)

Elements Used:

C: 8-8 H: 8-8 N: 0-10 O: 0-100 Na: 0-1 I: 1-7

12  
240405-1-7 10 (0.072)

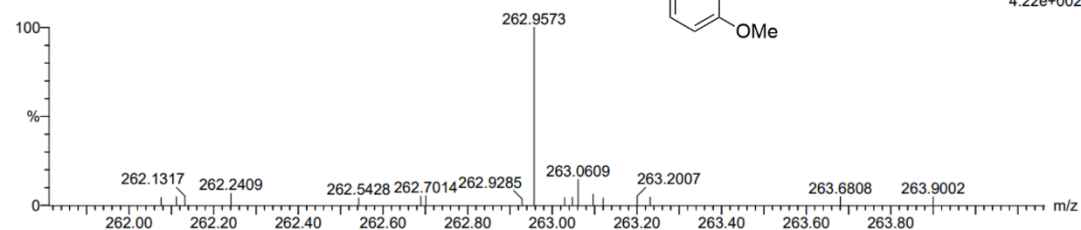

Minimum: -1.5  
Maximum: 5.0 10.0 50.0

| Mass     | Calc. Mass | mDa | PPM | DBE | i-FIT | Norm | Conf (%) | Formula    |
|----------|------------|-----|-----|-----|-------|------|----------|------------|
| 262.9573 | 262.9569   | 0.4 | 1.5 | 4.5 | 71.3  | n/a  | n/a      | C8 H8 O2 I |

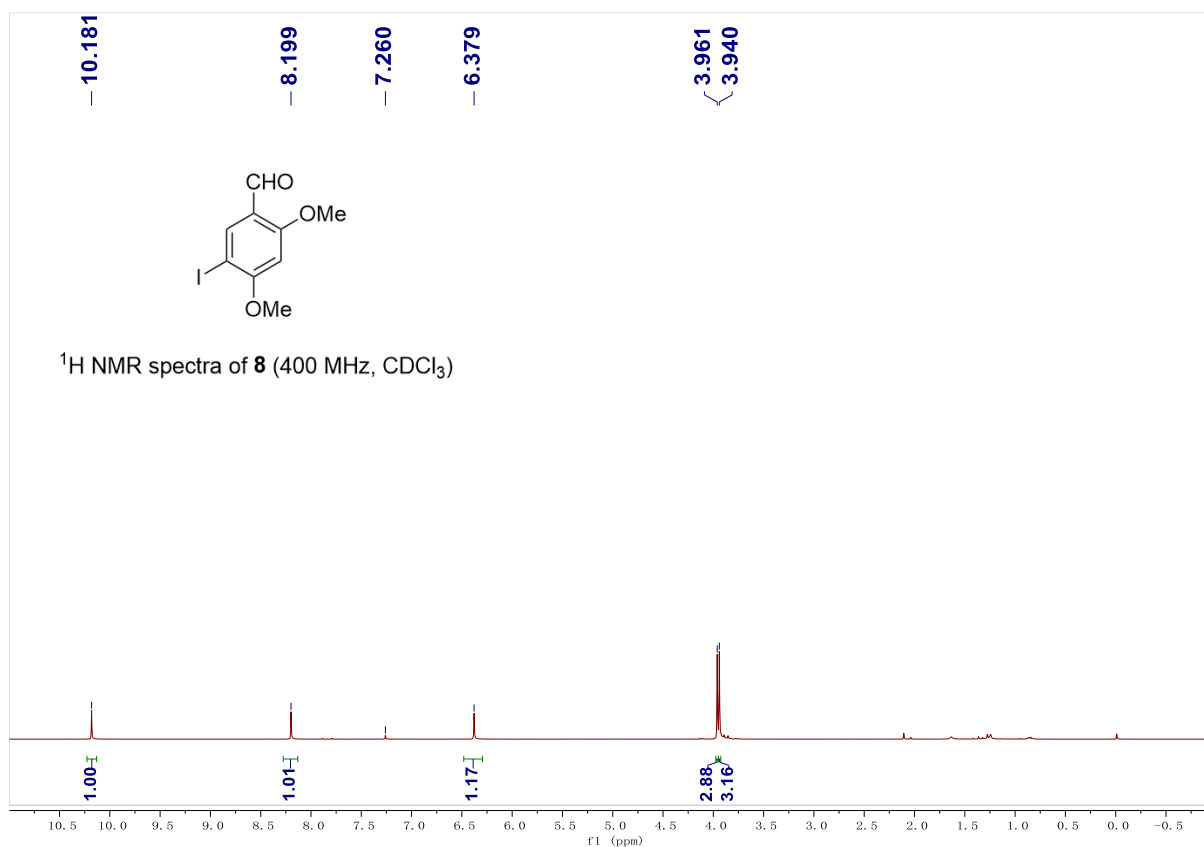



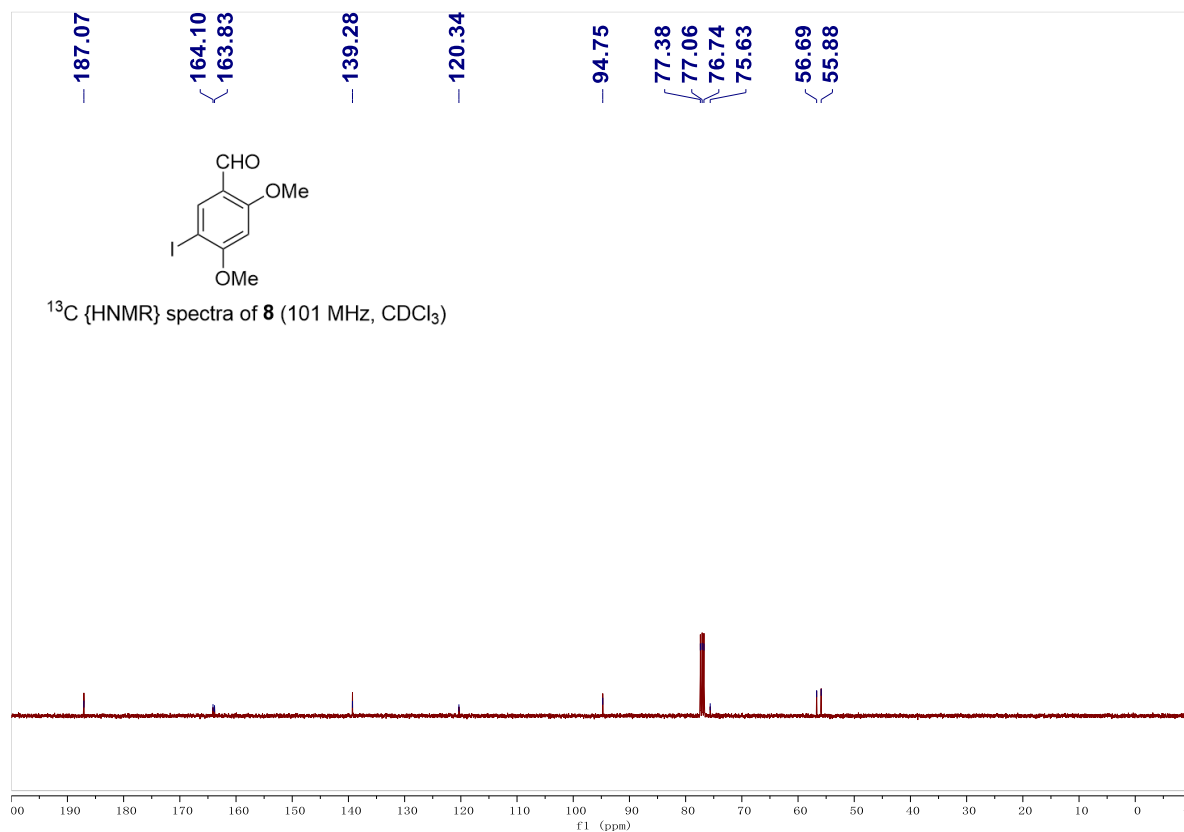

### Elemental Composition Report

Page 1

#### Single Mass Analysis

Tolerance = 5.0 mDa / DBE: min = -1.5, max = 50.0

Element prediction: Off

Number of isotope peaks used for i-FIT = 3

Monoisotopic Mass, Even Electron Ions

152 formula(e) evaluated with 1 results within limits (up to 50 best isotopic matches for each mass)

Elements Used:

C: 9-9 H: 9-9 N: 0-10 O: 0-100 Na: 0-1 I: 1-7

12

240405-1-8 13 (0.083)

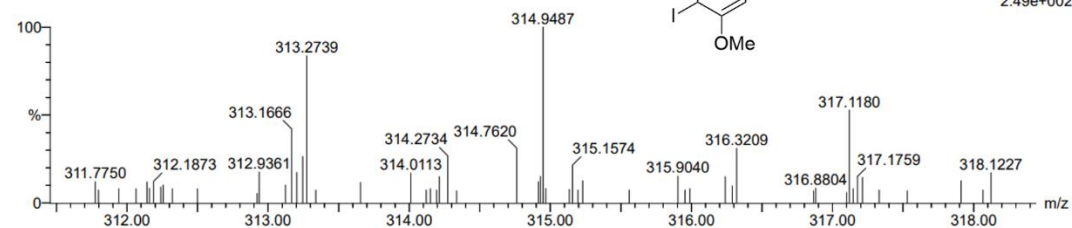

Minimum: -1.5  
Maximum: 50.0

| Mass     | Calc. Mass | mDa  | PPM  | DBE | i-FIT | Norm | Conf (%) | Formula                                          |
|----------|------------|------|------|-----|-------|------|----------|--------------------------------------------------|
| 314.9487 | 314.9494   | -0.7 | -2.2 | 4.5 | 136.2 | n/a  | n/a      | C <sub>9</sub> H <sub>9</sub> O <sub>3</sub> NaI |

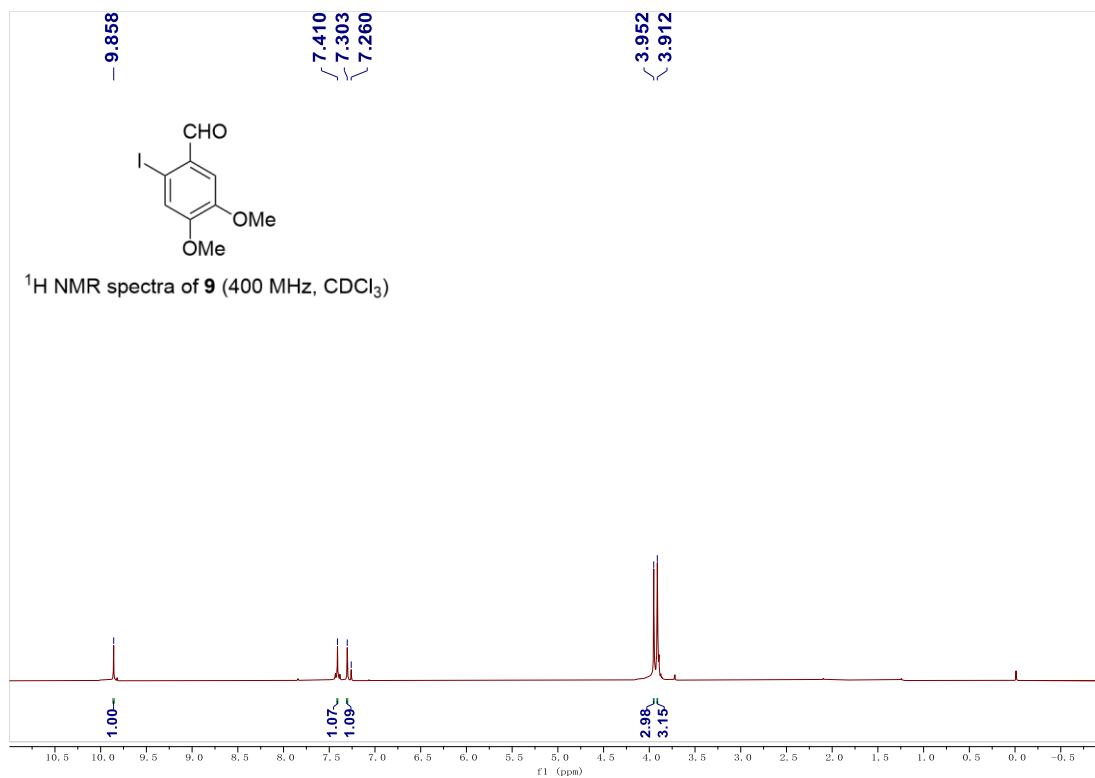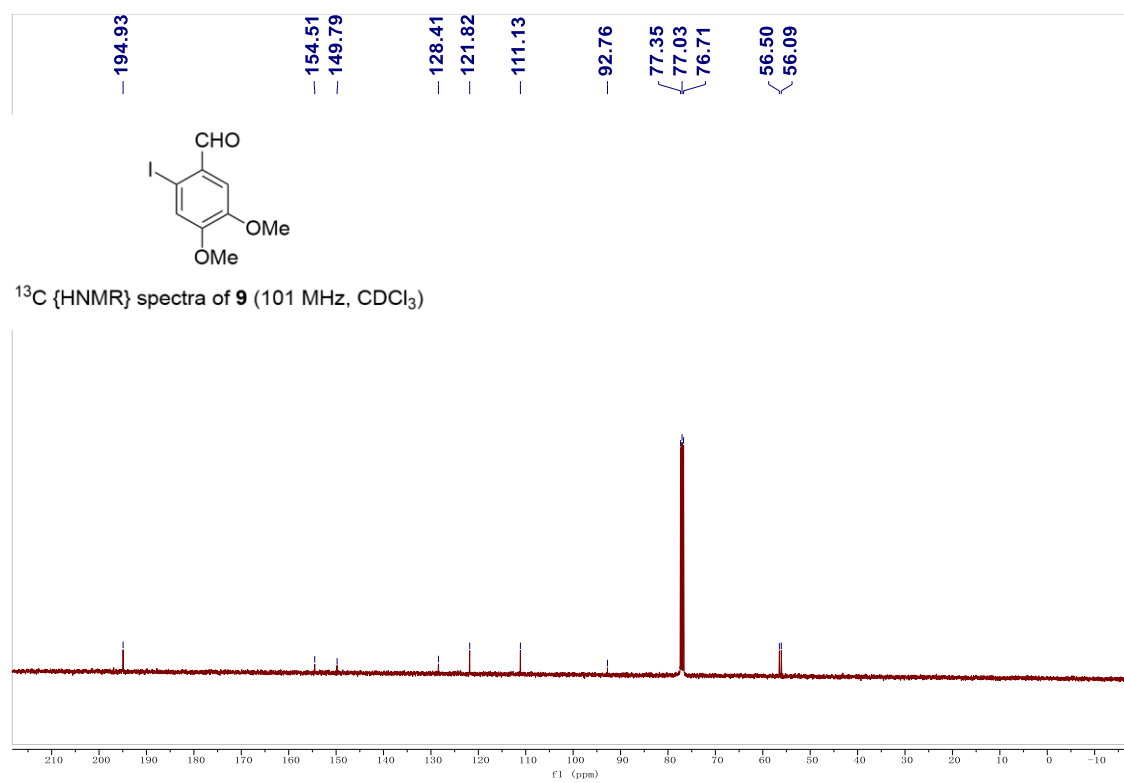

Single Mass Analysis

Tolerance = 5.0 mDa / DBE: min = -1.5, max = 50.0

Element prediction: Off

Number of isotope peaks used for i-FIT = 3

Monoisotopic Mass, Even Electron Ions

120 formula(e) evaluated with 1 results within limits (up to 50 best isotopic matches for each mass)

Elements Used:

C: 9-9 H: 10-10 N: 0-10 O: 0-100 Na: 0-1 I: 1-7

12

240405-1-9 12 (0.080)

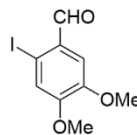

1: TOF MS ES+  
3.58e+002

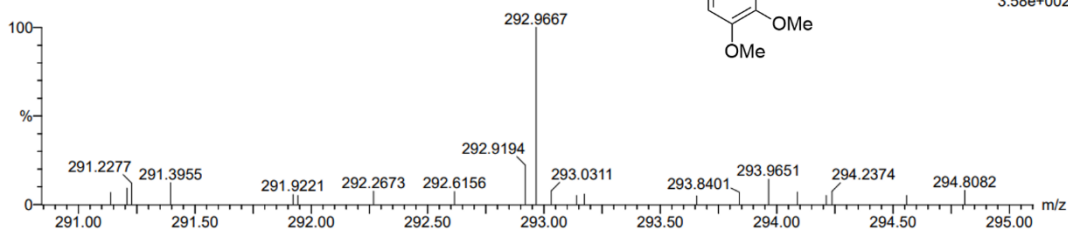

Minimum: -1.5  
Maximum: 5.0 10.0 50.0

| Mass     | Calc. Mass | mDa  | PPM  | DBE | i-FIT | Norm | Conf (%) | Formula     |
|----------|------------|------|------|-----|-------|------|----------|-------------|
| 292.9667 | 292.9675   | -0.8 | -2.7 | 4.5 | 76.3  | n/a  | n/a      | C9 H10 O3 I |

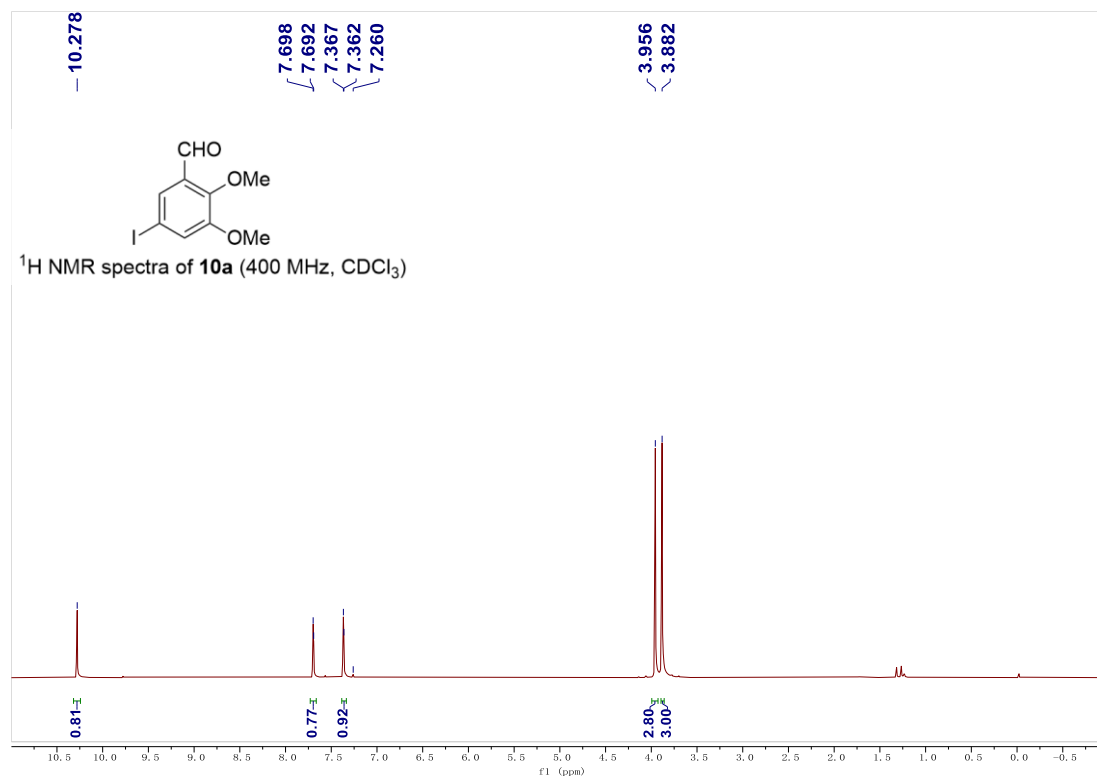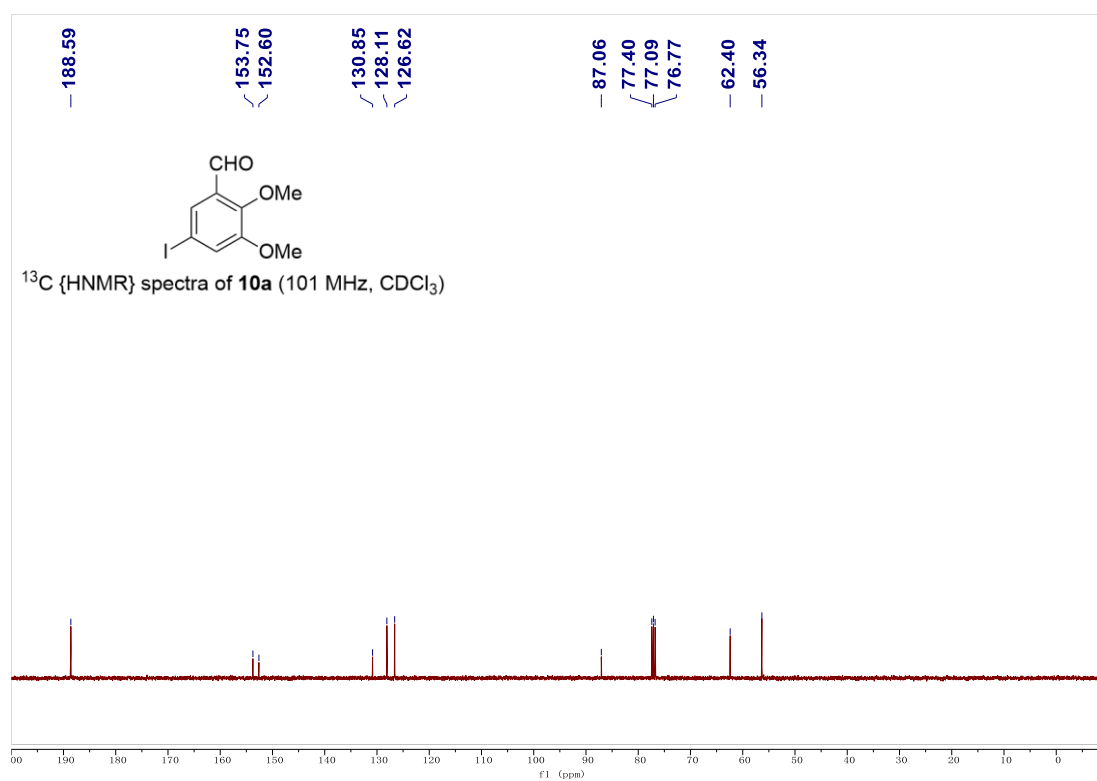

Single Mass Analysis

Tolerance = 5.0 mDa / DBE: min = -1.5, max = 50.0

Element prediction: Off

Number of isotope peaks used for i-FIT = 3

Monoisotopic Mass, Even Electron Ions

152 formula(e) evaluated with 1 results within limits (up to 50 best isotopic matches for each mass)

Elements Used:

C: 9-9 H: 9-9 N: 0-10 O: 0-100 Na: 0-1 I: 1-7

12  
240405-1-10a 11 (0.076)

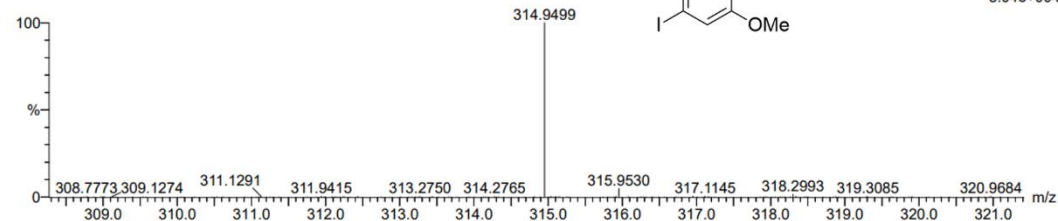

Minimum: -1.5  
Maximum: 5.0 10.0 50.0

| Mass     | Calc. Mass | mDa | PPM | DBE | i-FIT | Norm | Conf (%) | Formula       |
|----------|------------|-----|-----|-----|-------|------|----------|---------------|
| 314.9499 | 314.9494   | 0.5 | 1.6 | 4.5 | 260.4 | n/a  | n/a      | C9 H9 O3 Na I |

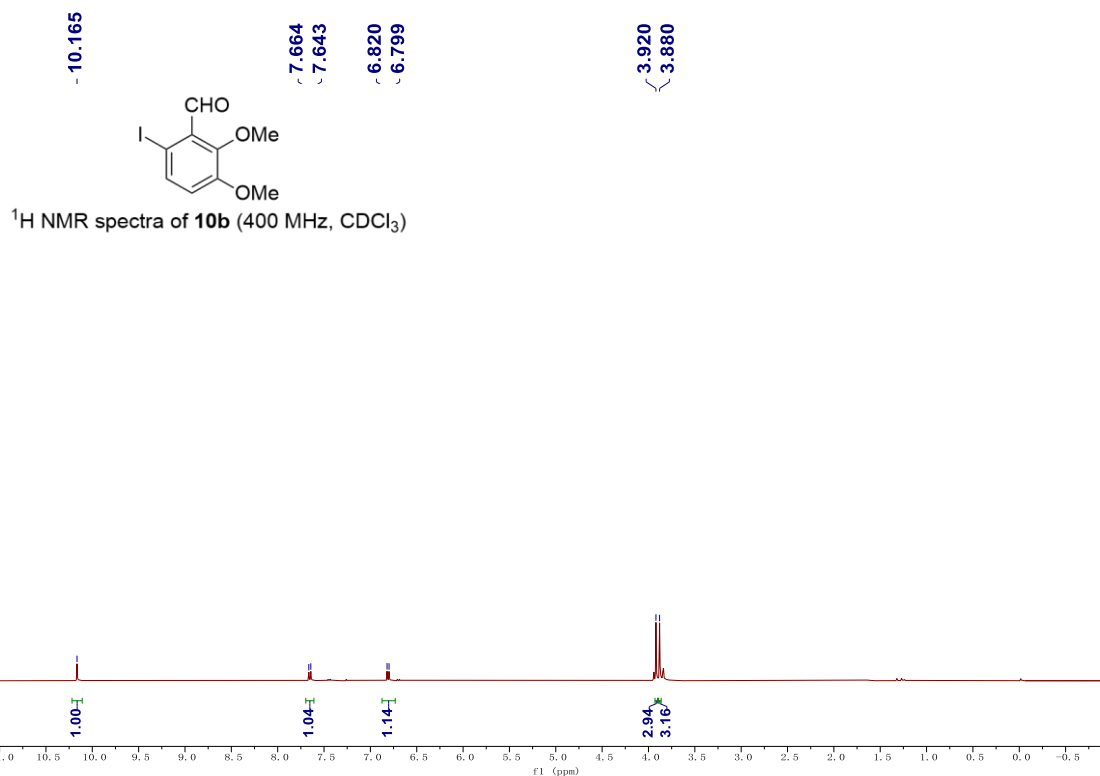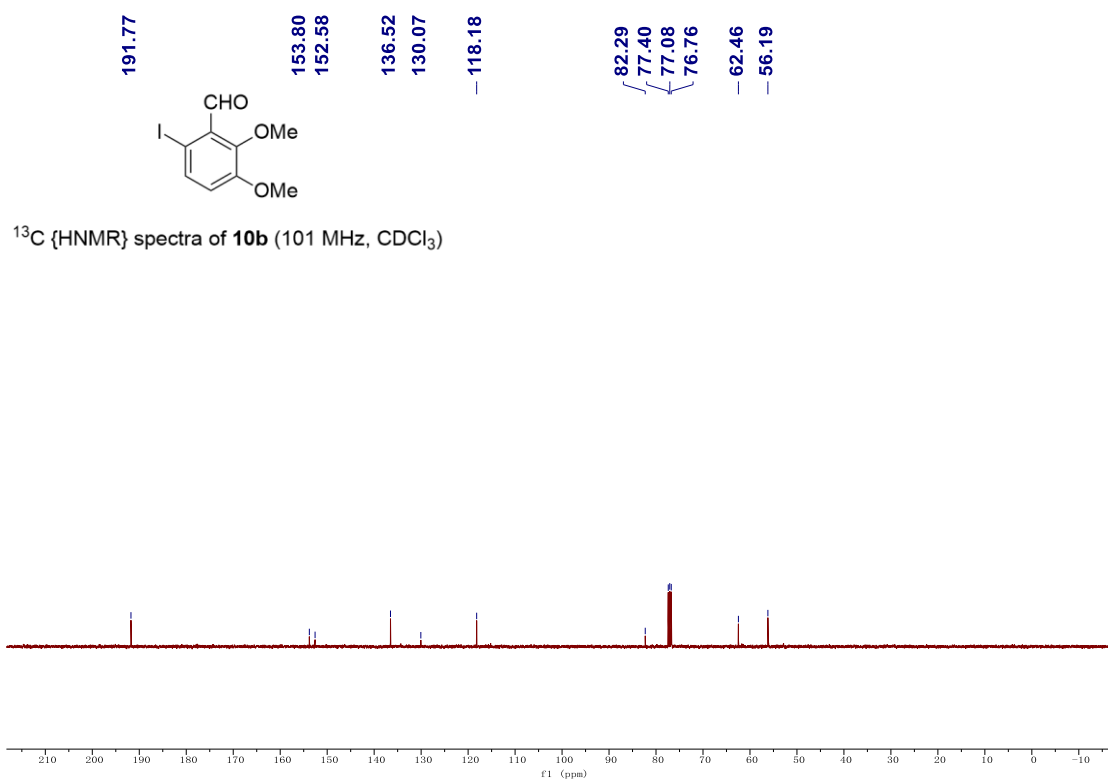

Single Mass Analysis

Tolerance = 5.0 mDa / DBE: min = -1.5, max = 50.0

Element prediction: Off

Number of isotope peaks used for i-FIT = 3

Monoisotopic Mass, Even Electron Ions

152 formula(e) evaluated with 1 results within limits (up to 50 best isotopic matches for each mass)

Elements Used:

C: 9-9 H: 9-9 N: 0-10 O: 0-100 Na: 0-1 I: 1-7

12

240405-1-11b 11 (0.076)

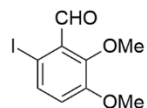

1: TOF MS ES+  
3.10e+005

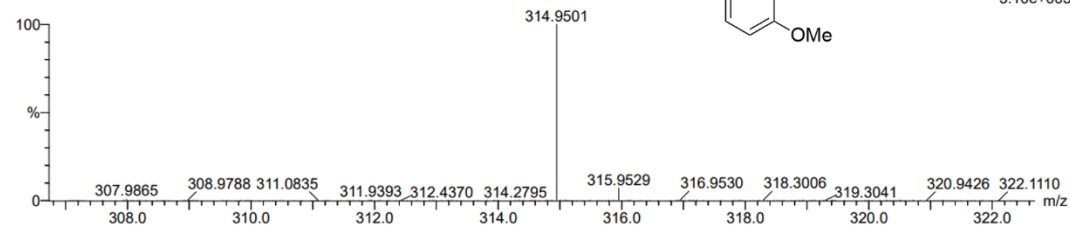

Minimum: -1.5  
Maximum: 5.0 10.0 50.0

| Mass     | Calc. Mass | mDa | PPM | DBE | i-FIT | Norm | Conf (%) | Formula       |
|----------|------------|-----|-----|-----|-------|------|----------|---------------|
| 314.9501 | 314.9494   | 0.7 | 2.2 | 4.5 | 355.2 | n/a  | n/a      | C9 H9 O3 Na I |

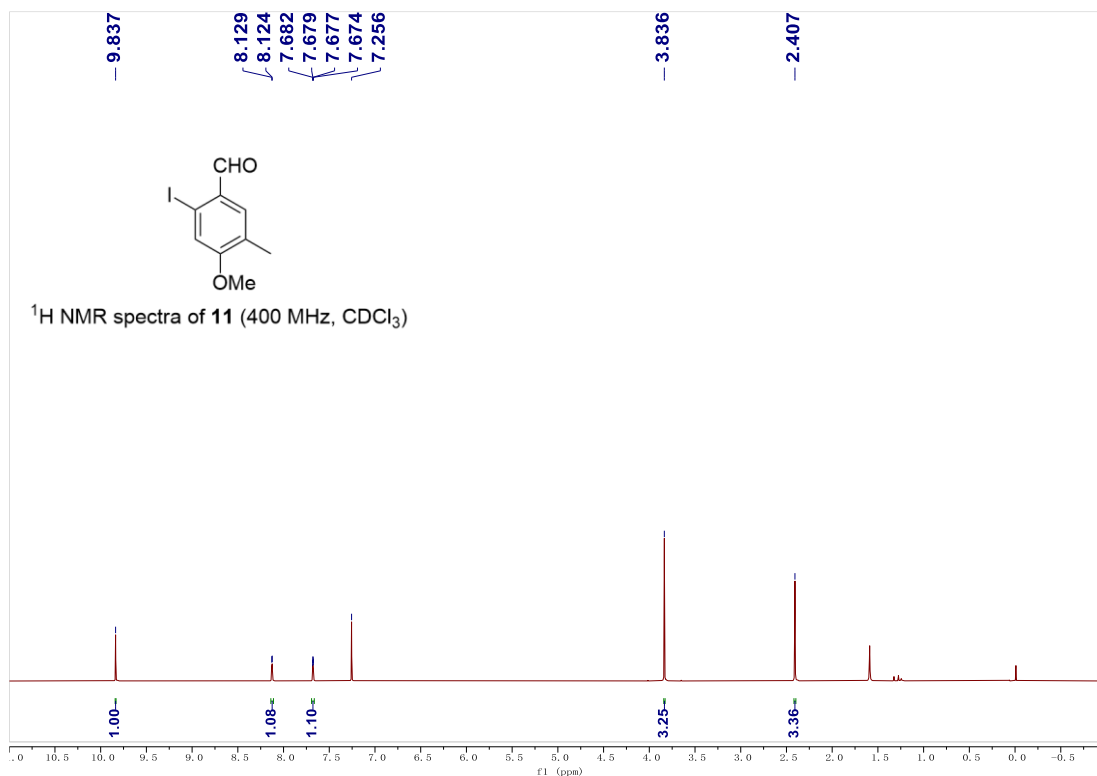

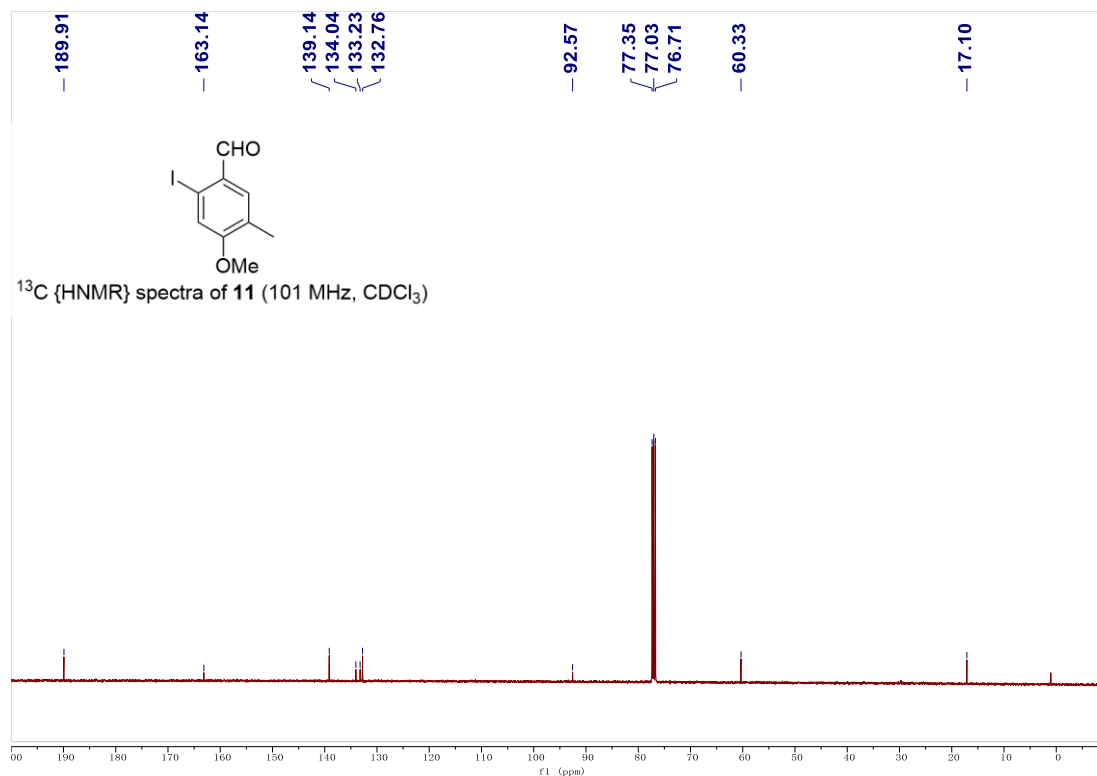

### Elemental Composition Report

Page 1

#### Single Mass Analysis

Tolerance = 5.0 mDa / DBE: min = -1.5, max = 50.0

Element prediction: Off

Number of isotope peaks used for i-FIT = 3

Monoisotopic Mass, Even Electron Ions

99 formula(e) evaluated with 1 results within limits (up to 50 best isotopic matches for each mass)

Elements Used:

C: 9-9 H: 10-10 N: 0-10 O: 0-100 Na: 0-1 I: 1-7

12  
240405-1-11 44 (0.194)

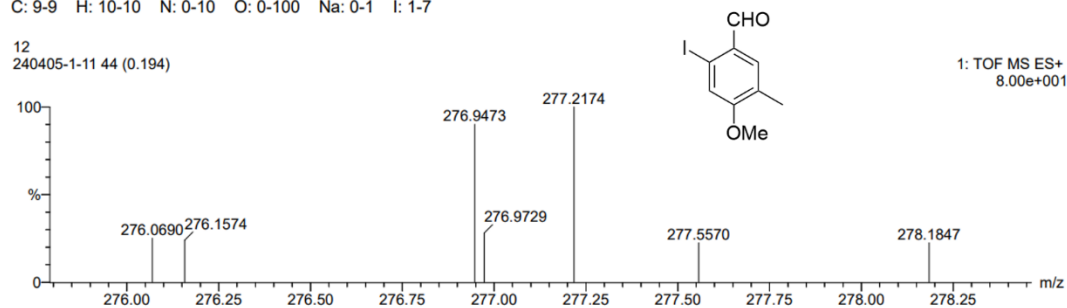

Minimum: -1.5  
Maximum: 50.0

| Mass     | Calc. Mass | mDa | PPM | DBE | i-FIT | Norm | Conf (%) | Formula     |
|----------|------------|-----|-----|-----|-------|------|----------|-------------|
| 276.9729 | 276.9725   | 0.4 | 1.4 | 4.5 | 31.4  | n/a  | n/a      | C9 H10 O2 I |



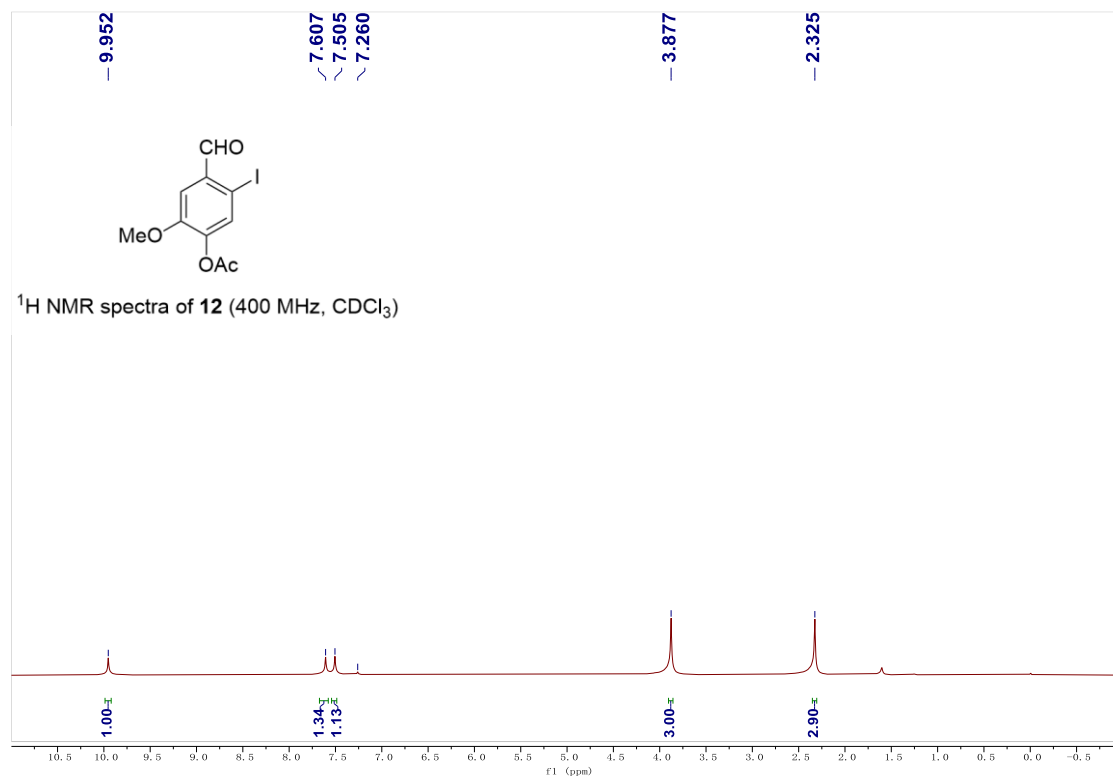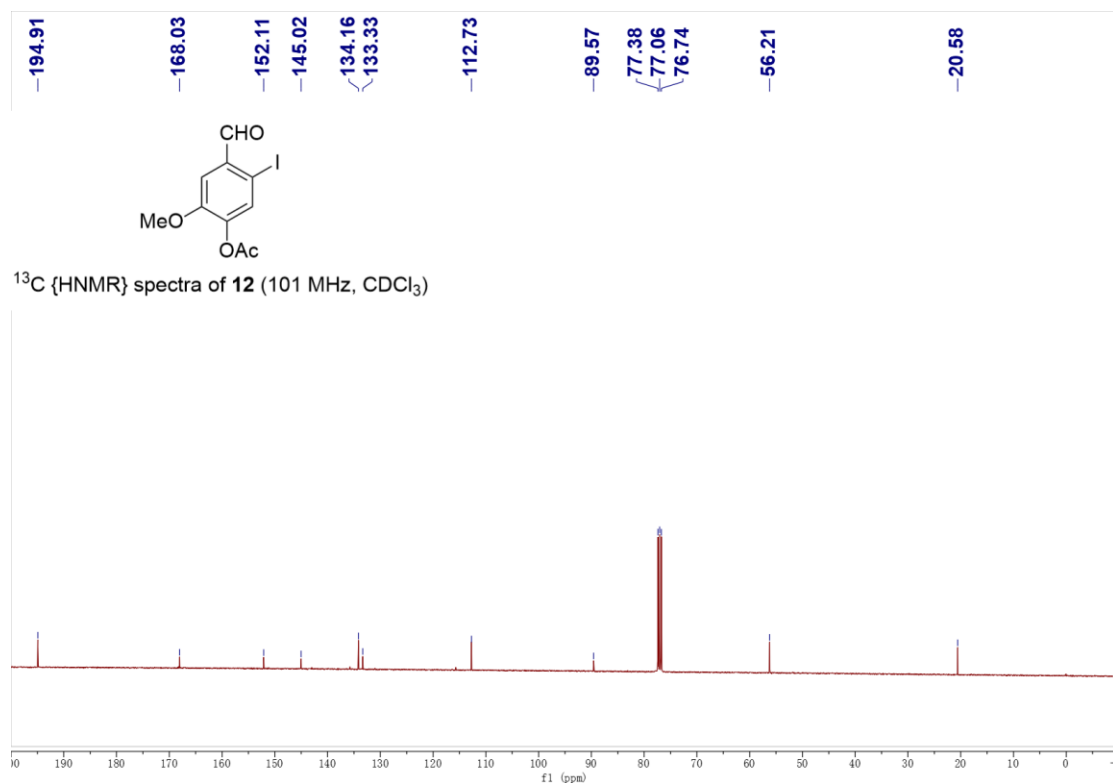

Elemental Composition Report

Single Mass Analysis

Tolerance = 5.0 mDa / DBE: min = -1.5, max = 50.0

Element prediction: Off

Number of isotope peaks used for i-FIT = 3

Monoisotopic Mass, Even Electron Ions

45 formula(e) evaluated with 1 results within limits (up to 50 best isotopic matches for each mass)

Elements Used:

C: 10-10 H: 9-9 O: 0-100 I: 1-2 Na: 0-2

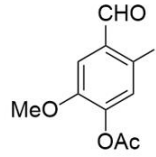

1: TOF MS ES+  
5.43e+04

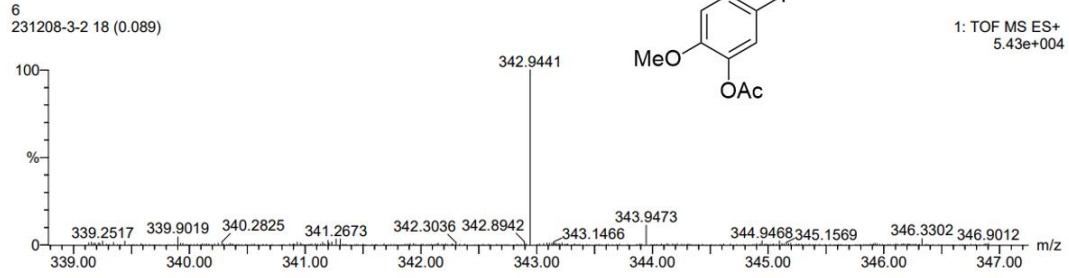

Minimum: -1.5  
Maximum: 5.0 10.0 50.0

| Mass     | Calc. Mass | mDa  | PPM  | DBE | i-FIT | Norm | Conf (%) | Formula        |
|----------|------------|------|------|-----|-------|------|----------|----------------|
| 342.9441 | 342.9443   | -0.2 | -0.6 | 5.5 | 924.6 | n/a  | n/a      | C10 H9 O4 I Na |

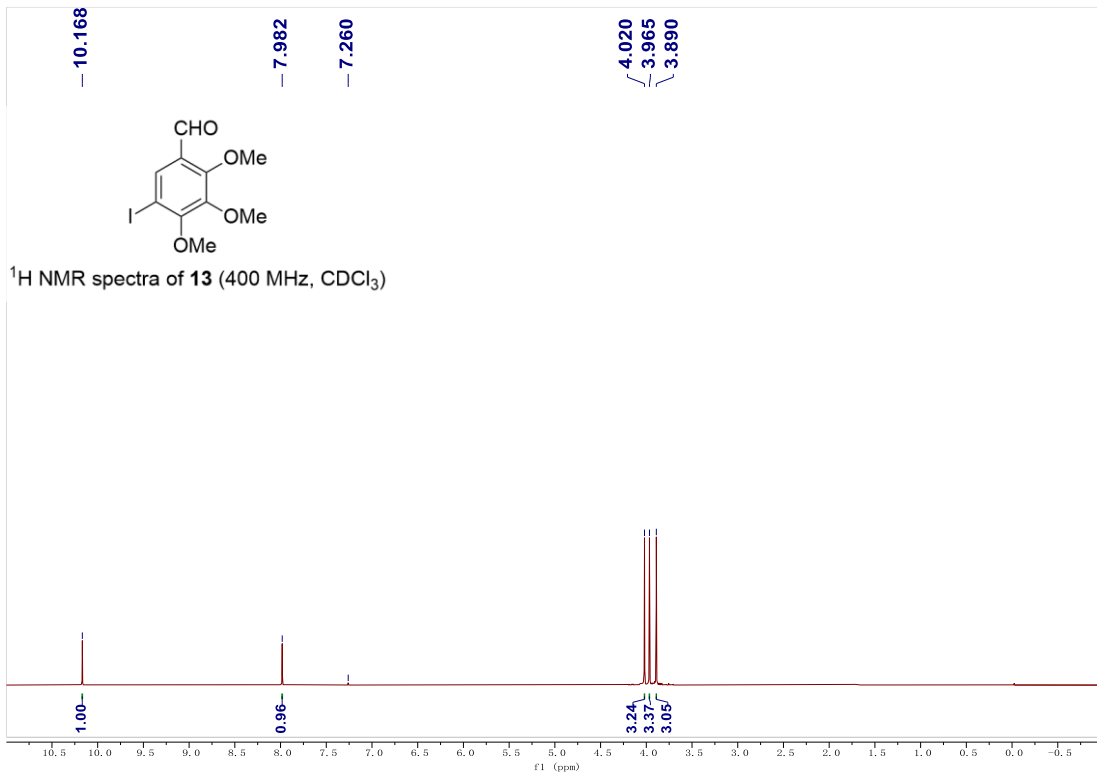

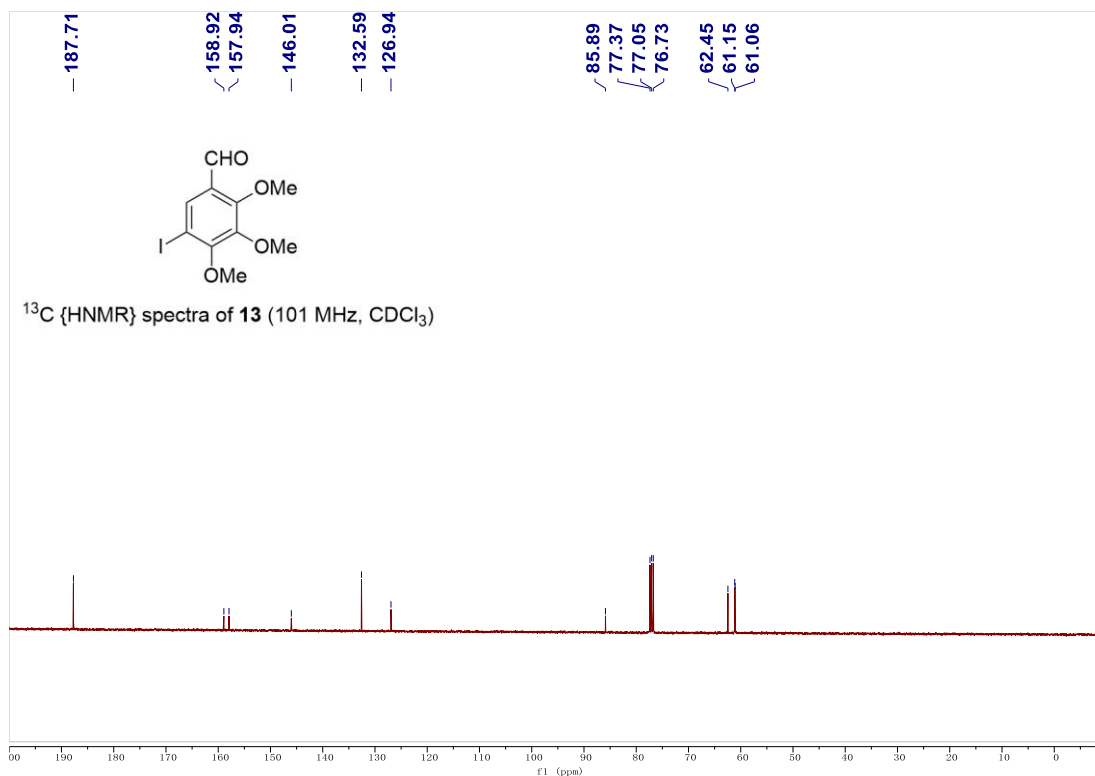

**Elemental Composition Report**

**Single Mass Analysis**

Tolerance = 5.0 mDa / DBE: min = -1.5, max = 50.0

Element prediction: Off

Number of isotope peaks used for i-FIT = 3

Monoisotopic Mass, Even Electron Ions

44 formula(e) evaluated with 1 results within limits (up to 50 best isotopic matches for each mass)

Elements Used:

C: 10-10 H: 11-11 O: 0-100 Na: 0-2 I: 1-2

6

231208-3-3 21 (0.100)

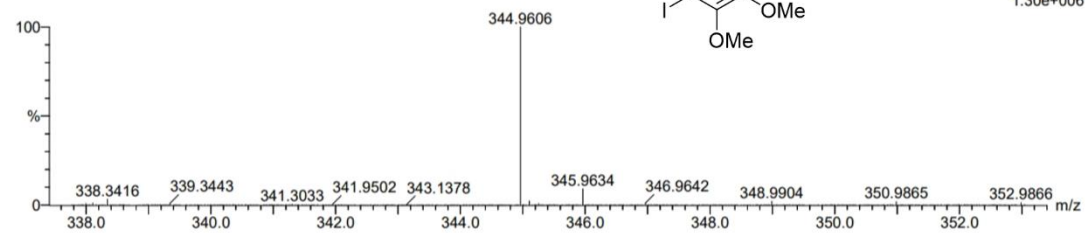

Minimum: -1.5  
Maximum: 5.0 10.0 50.0

| Mass     | Calc. Mass | mDa | PPM | DBE | i-FIT  | Norm | Conf(%) | Formula         |
|----------|------------|-----|-----|-----|--------|------|---------|-----------------|
| 344.9606 | 344.9600   | 0.6 | 1.7 | 4.5 | 1027.9 | n/a  | n/a     | C10 H11 O4 Na I |

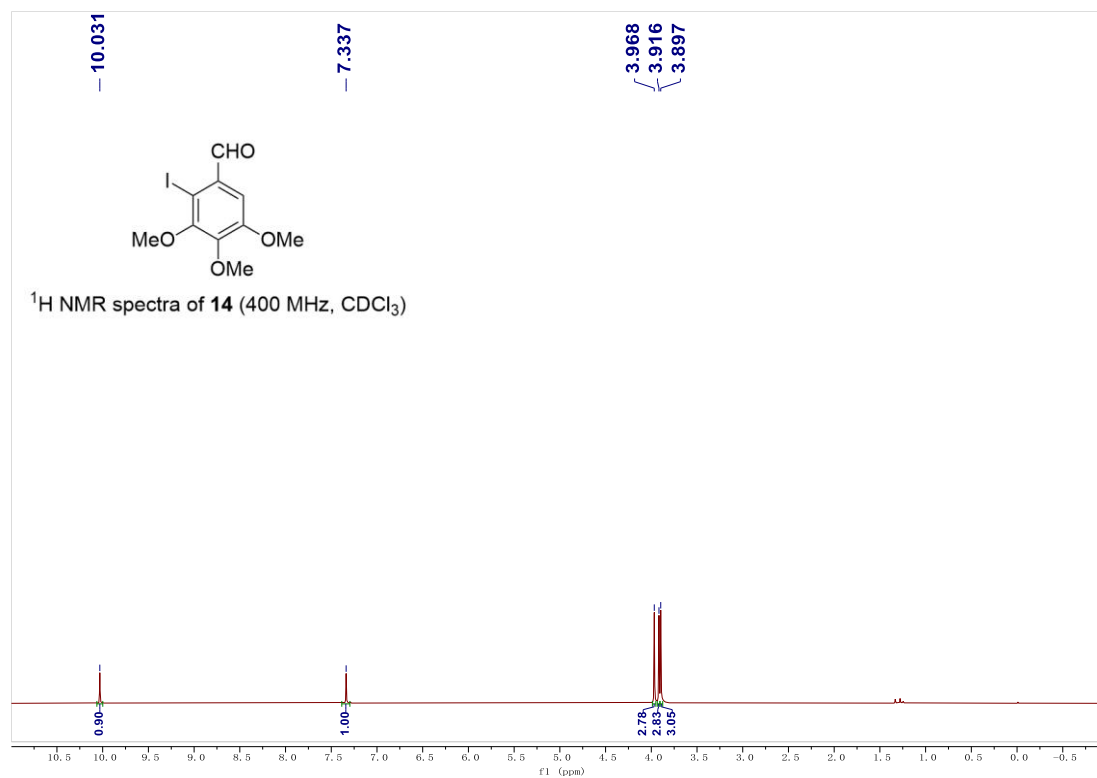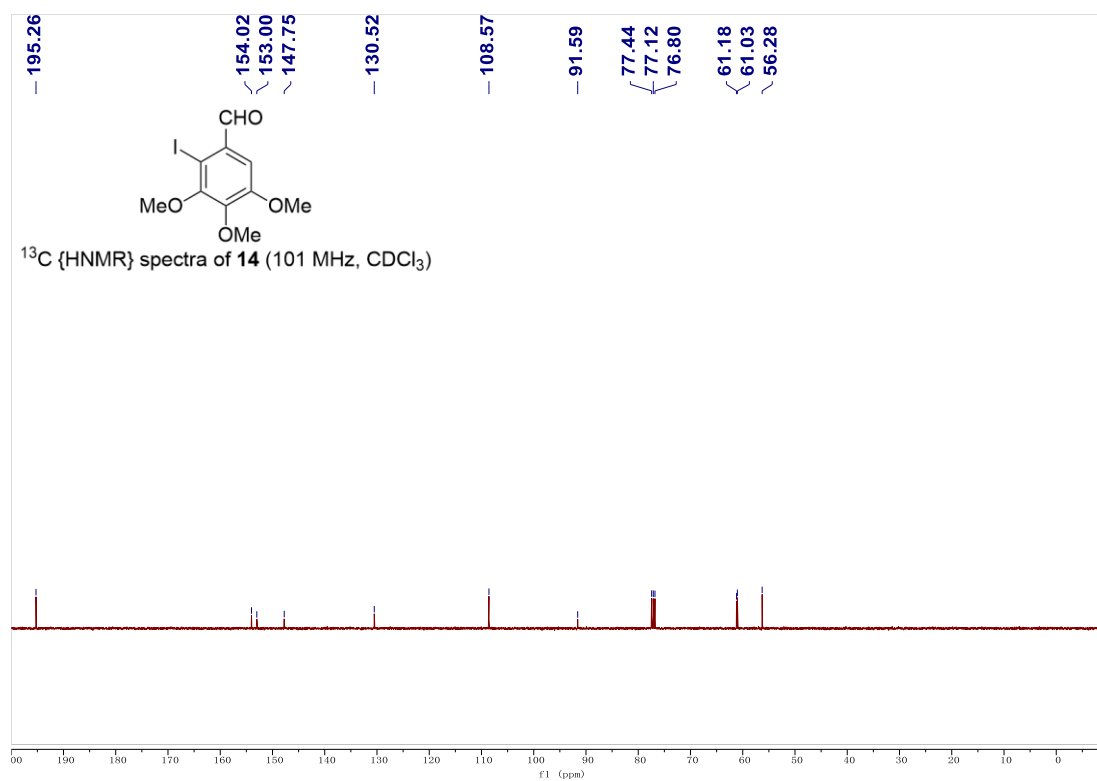

Elemental Composition Report

Single Mass Analysis

Tolerance = 5.0 mDa / DBE: min = -1.5, max = 50.0

Element prediction: Off

Number of isotope peaks used for i-FIT = 3

Monoisotopic Mass, Even Electron Ions

205 formula(e) evaluated with 1 results within limits (up to 50 best isotopic matches for each mass)

Elements Used:

C: 10-10 H: 11-11 N: 0-10 O: 0-100 Na: 0-1 I: 1-7

12

240405-1-14 15 (0.090)

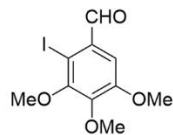

1: TOF MS ES+  
5.24e+004

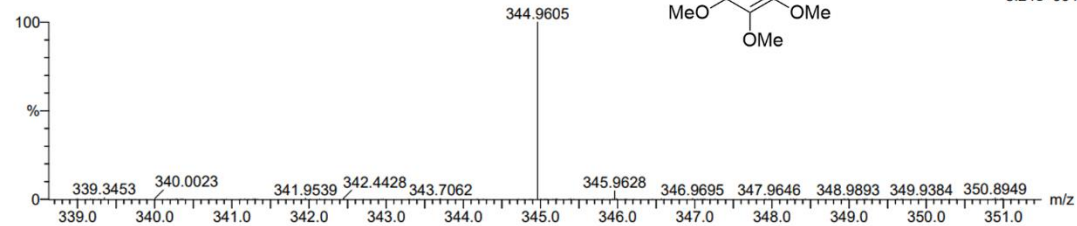

Minimum: -1.5  
Maximum: 50.0

| Mass     | Calc. Mass | mDa | PPM | DBE | i-FIT | Norm | Conf (%) | Formula         |
|----------|------------|-----|-----|-----|-------|------|----------|-----------------|
| 344.9605 | 344.9600   | 0.5 | 1.4 | 4.5 | 223.2 | n/a  | n/a      | C10 H11 O4 Na I |

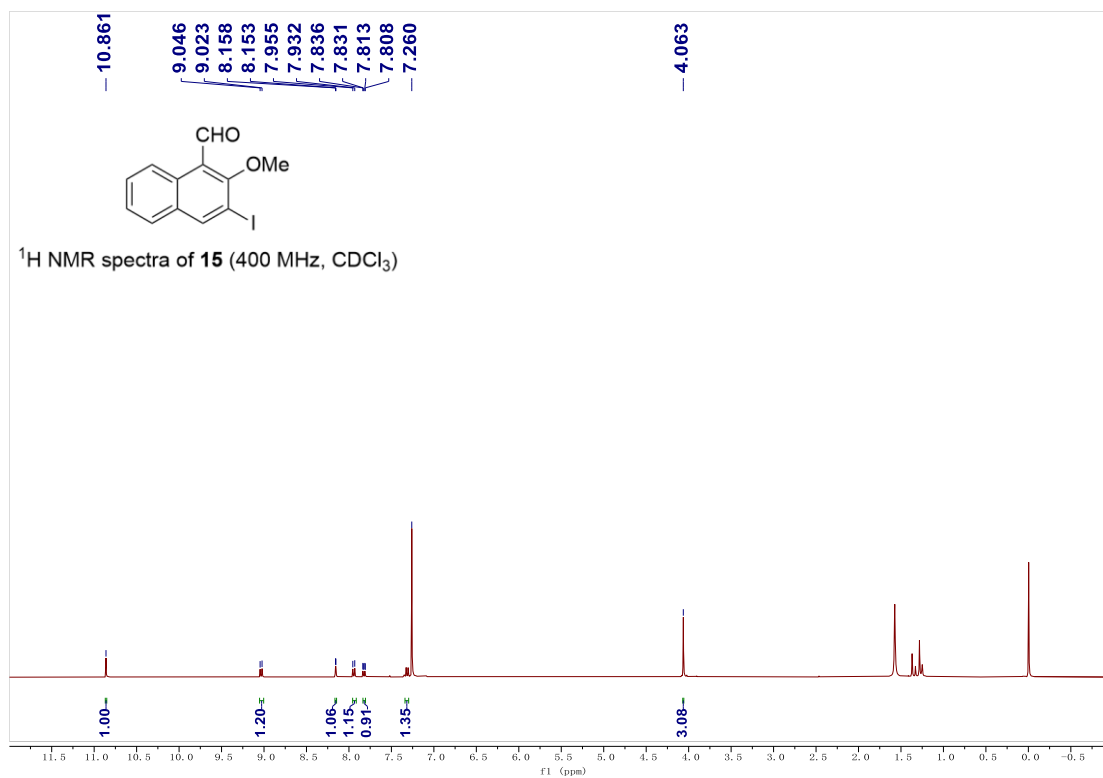

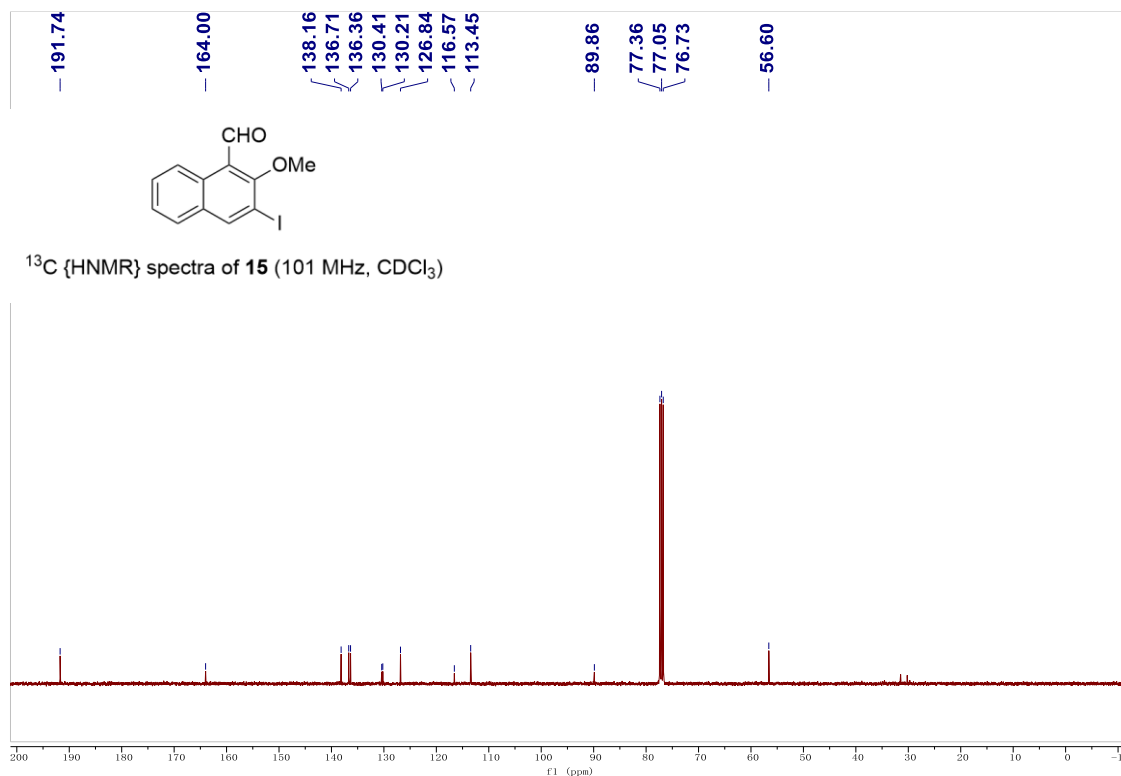

### Elemental Composition Report

Page 1

#### Single Mass Analysis

Tolerance = 5.0 mDa / DBE: min = -1.5, max = 50.0

Element prediction: Off

Number of isotope peaks used for i-FIT = 3

Monoisotopic Mass, Even Electron Ions

35 formula(e) evaluated with 1 results within limits (up to 50 best isotopic matches for each mass)

Elements Used:

C: 12-12 H: 10-10 O: 0-100 Na: 0-2 I: 1-2

6

231208-3-4 16 (0.082)

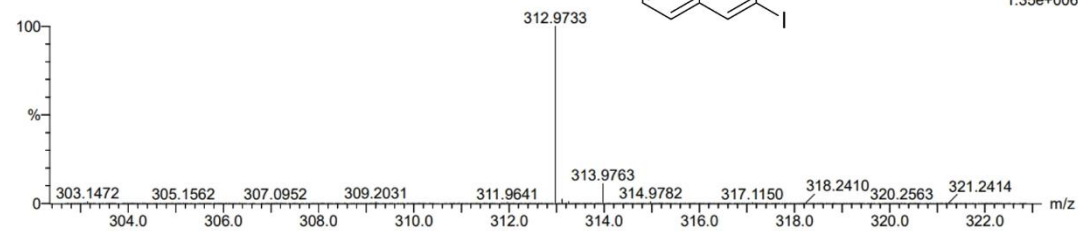

Minimum: -1.5  
Maximum: 50.0

| Mass     | Calc. Mass | mDa | PPM | DBE | i-FIT  | Norm | Conf (%) | Formula      |
|----------|------------|-----|-----|-----|--------|------|----------|--------------|
| 312.9733 | 312.9725   | 0.8 | 2.6 | 7.5 | 1149.6 | n/a  | n/a      | C12 H10 O2 I |

10.220  
9.227  
9.225  
9.224  
9.222  
9.206  
9.203  
9.201  
8.252  
8.184  
8.182  
8.180  
8.178  
8.163  
8.161  
8.159  
8.158  
7.729  
7.725  
7.711  
7.708  
7.704  
7.690  
7.686  
7.640  
7.637  
7.623  
7.619  
7.616  
7.602  
7.599  
7.260  
4.032

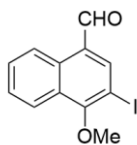

<sup>1</sup>H NMR spectra of **16** (400 MHz, CDCl<sub>3</sub>)

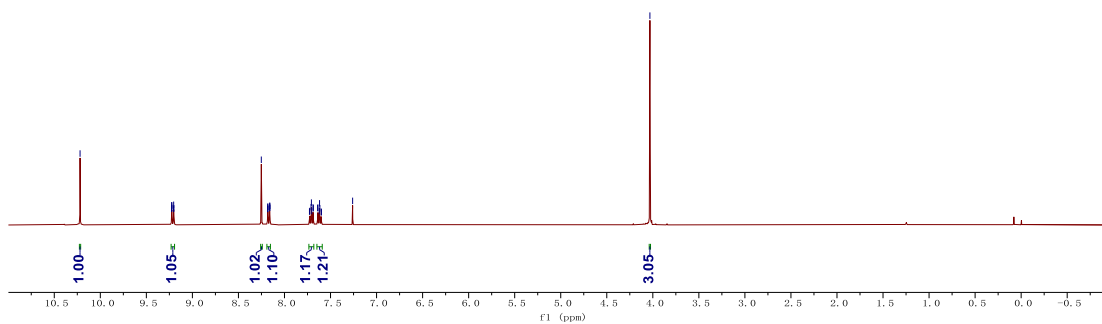

191.31  
162.15  
146.46  
132.00  
129.72  
129.46  
128.66  
127.78  
125.43  
122.77  
85.26  
77.39  
77.07  
76.75  
62.09

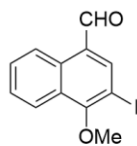

<sup>13</sup>C {HNMR} spectra of **16** (101 MHz, CDCl<sub>3</sub>)

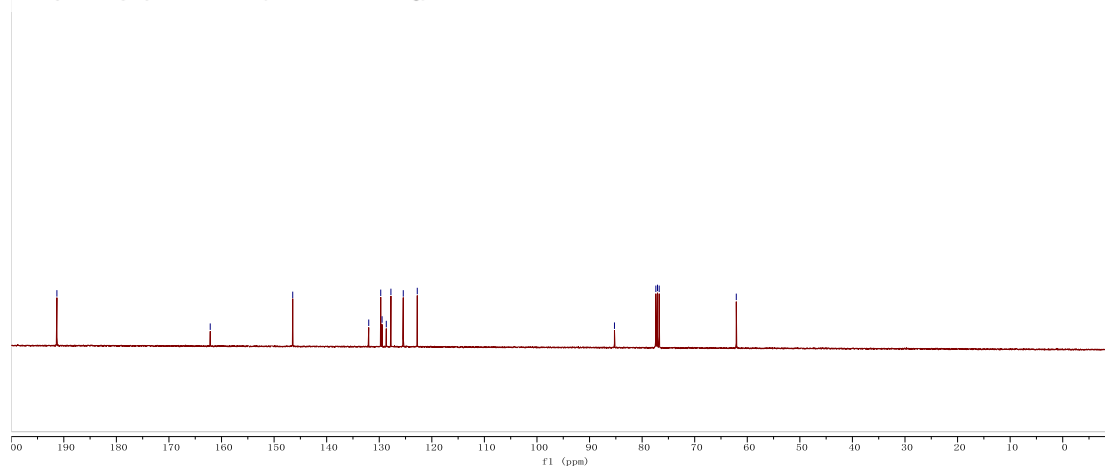

**Elemental Composition Report**

**Single Mass Analysis**

Tolerance = 5.0 mDa / DBE: min = -1.5, max = 50.0

Element prediction: Off

Number of isotope peaks used for i-FIT = 3

Monoisotopic Mass, Even Electron Ions

35 formula(e) evaluated with 1 results within limits (up to 50 best isotopic matches for each mass)

Elements Used:

C: 12-12 H: 10-10 O: 0-100 Na: 0-2 I: 1-2

6

231208-3-5 16 (0.083)

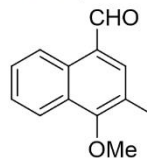

1: TOF MS ES+  
8.06e+005

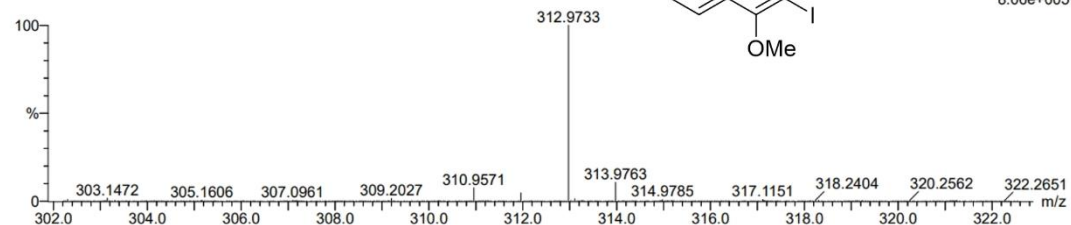

Minimum: -1.5  
Maximum: 5.0 10.0 50.0

| Mass     | Calc. Mass | mDa | PPM | DBE | i-FIT  | Norm | Conf (%) | Formula      |
|----------|------------|-----|-----|-----|--------|------|----------|--------------|
| 312.9733 | 312.9725   | 0.8 | 2.6 | 7.5 | 1081.4 | n/a  | n/a      | C12 H10 O2 I |



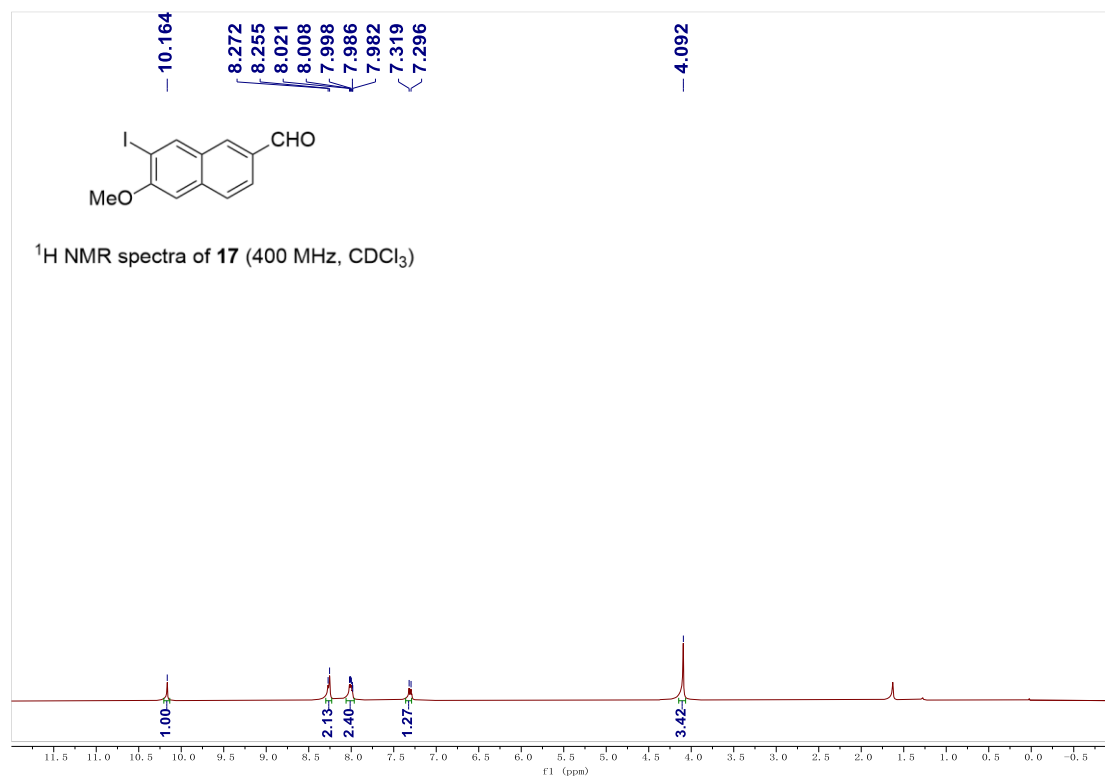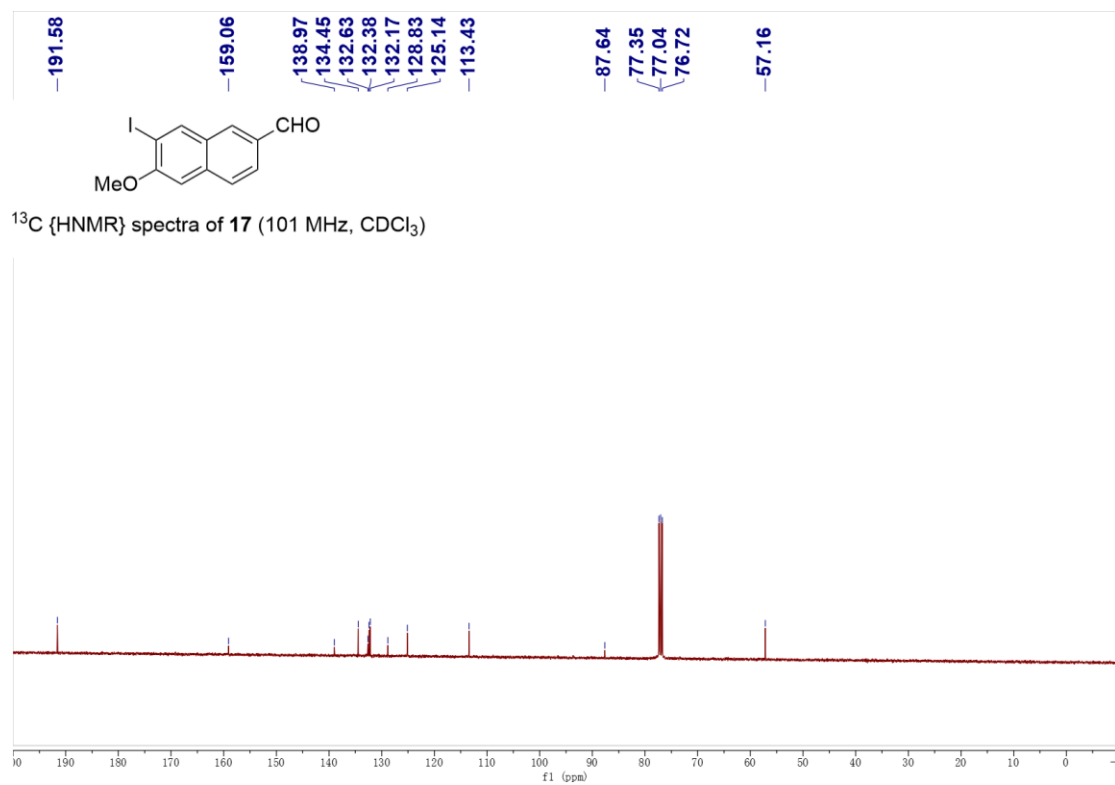

## Single Mass Analysis

Tolerance = 5.0 mDa / DBE: min = -1.5, max = 50.0

Element prediction: Off

Number of isotope peaks used for i-FIT = 3

Monoisotopic Mass, Even Electron Ions

35 formula(e) evaluated with 1 results within limits (up to 50 best isotopic matches for each mass)

Elements Used:

C: 12-12 H: 10-10 O: 0-100 Na: 0-2 I: 1-2

6  
231208-3-6 16 (0.082)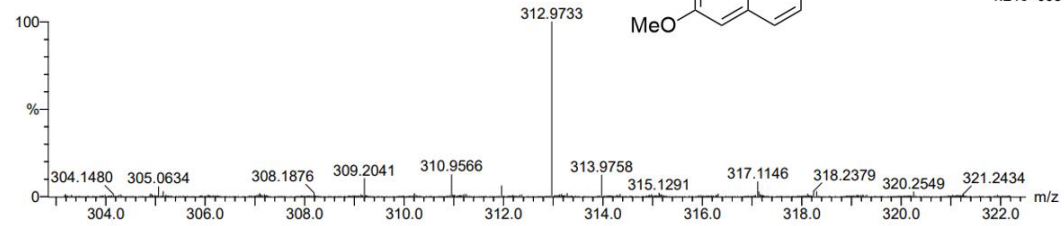

Minimum: -1.5  
Maximum: 5.0 10.0 50.0

| Mass     | Calc. Mass | mDa | PPM | DBE | i-FIT  | Norm | Conf (%) | Formula      |
|----------|------------|-----|-----|-----|--------|------|----------|--------------|
| 312.9733 | 312.9725   | 0.8 | 2.6 | 7.5 | 1010.7 | n/a  | n/a      | C12 H10 O2 I |

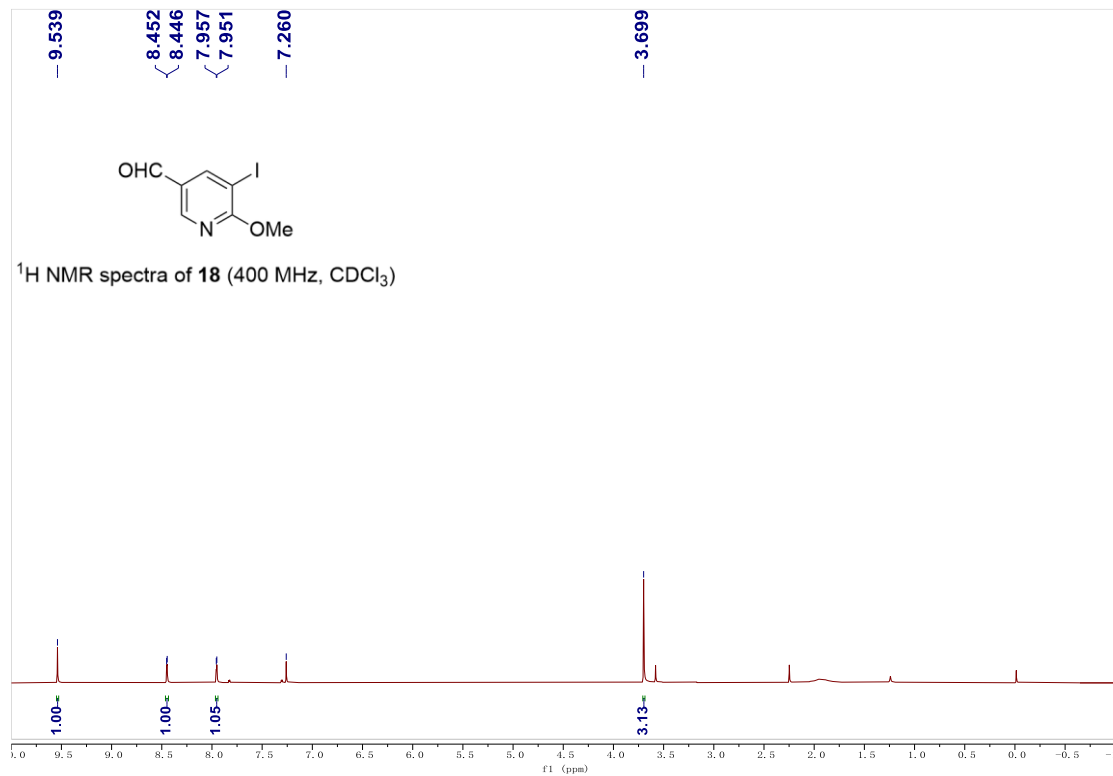

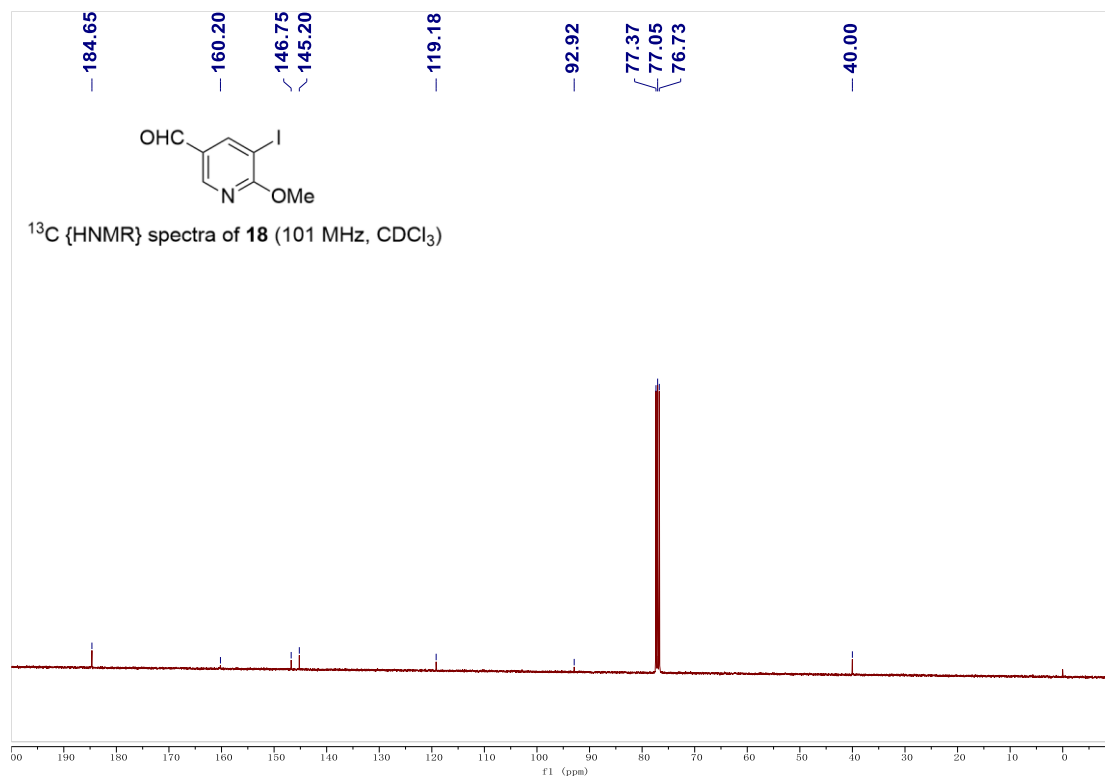

### Elemental Composition Report

Page 1

#### Single Mass Analysis

Tolerance = 5.0 mDa / DBE: min = -1.5, max = 50.0

Element prediction: Off

Number of isotope peaks used for i-FIT = 3

Monoisotopic Mass, Even Electron Ions

138 formula(e) evaluated with 1 results within limits (up to 50 best isotopic matches for each mass)

Elements Used:

C: 7-7 H: 6-6 N: 0-200 O: 0-100 Na: 0-2 I: 1-2

6

231208-3-7 21 (0.100)

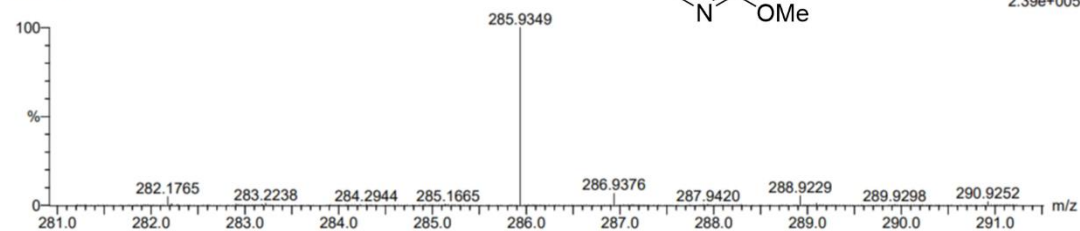

Minimum: -1.5  
Maximum: 5.0 10.0 50.0

| Mass     | Calc. Mass | mDa | PPM | DBE | i-FIT | Norm | Conf (%) | Formula         |
|----------|------------|-----|-----|-----|-------|------|----------|-----------------|
| 285.9349 | 285.9341   | 0.8 | 2.8 | 4.5 | 954.3 | n/a  | n/a      | C7 H6 N O2 Na I |

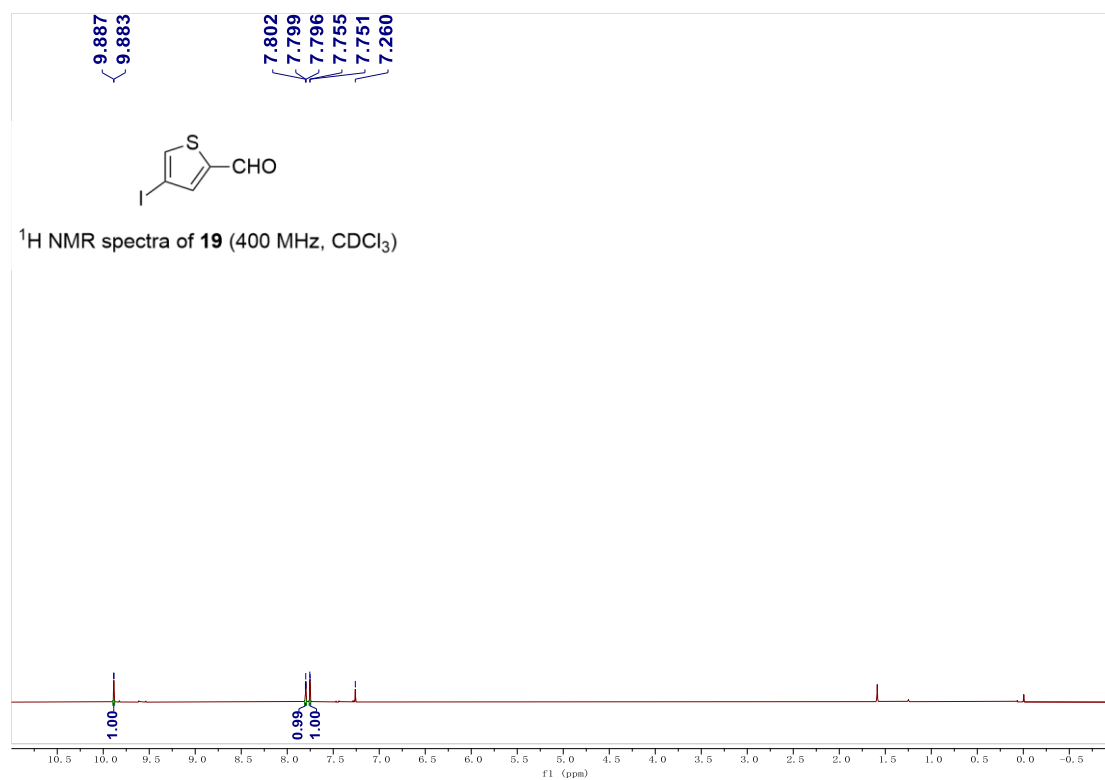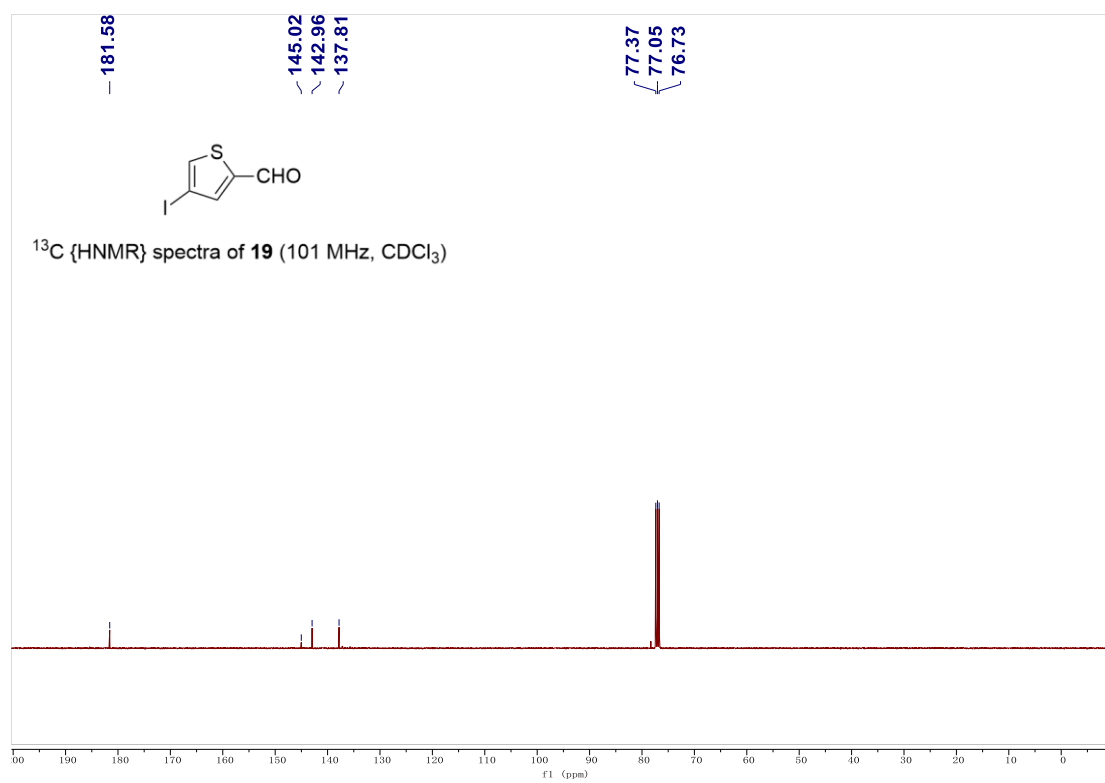

## Elemental Composition Report

Page 1

### Single Mass Analysis

Tolerance = 5.0 mDa / DBE: min = -1.5, max = 50.0

Element prediction: Off

Number of isotope peaks used for i-FIT = 3

Monoisotopic Mass, Even Electron Ions

92 formula(e) evaluated with 1 results within limits (up to 50 best isotopic matches for each mass)

Elements Used:

C: 5-5 H: 4-4 N: 0-10 O: 0-100 Na: 0-1 S: 0-2 I: 1-7

12  
240405-1-19 20 (0.108)

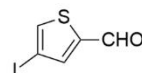

1: TOF MS ES+  
5.10e+001

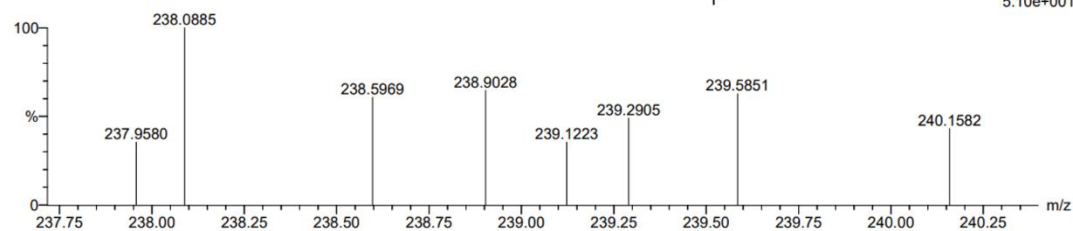

Minimum: -1.5  
Maximum: 50.0

| Mass     | Calc. Mass | mDa | PPM | DBE | i-FIT | Norm | Conf (%) | Formula     |
|----------|------------|-----|-----|-----|-------|------|----------|-------------|
| 238.9028 | 238.9028   | 0.0 | 0.0 | 3.5 | 36.0  | n/a  | n/a      | C5 H4 O S I |

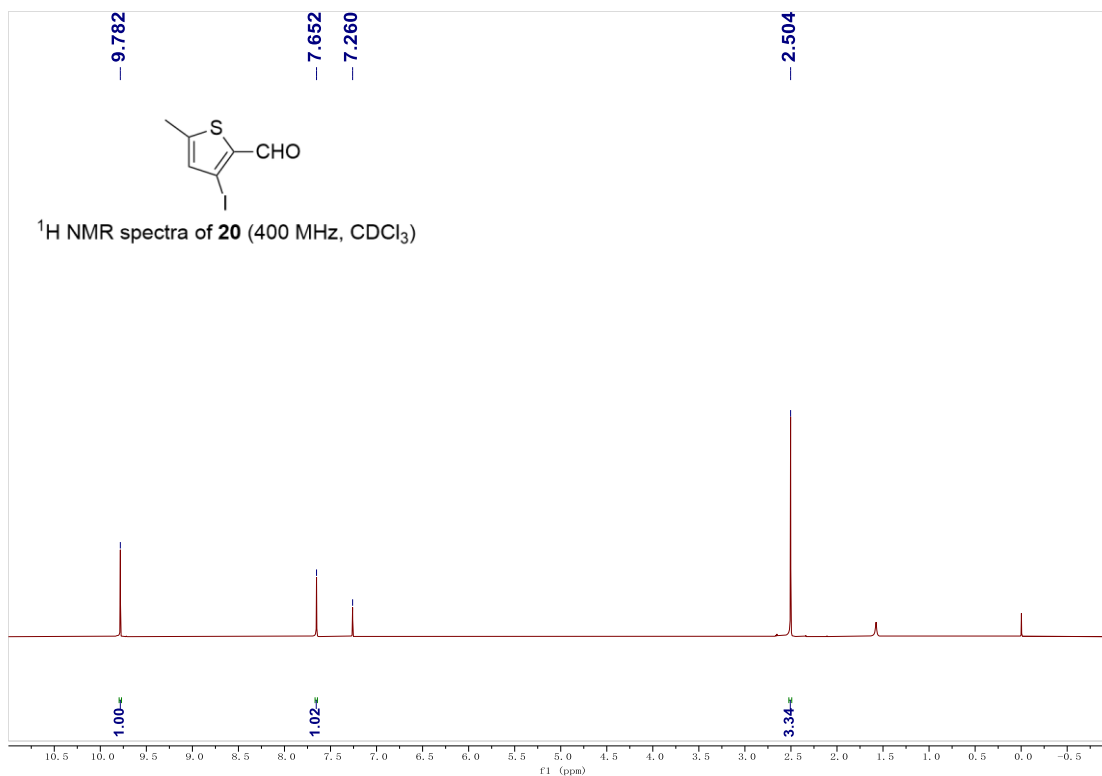

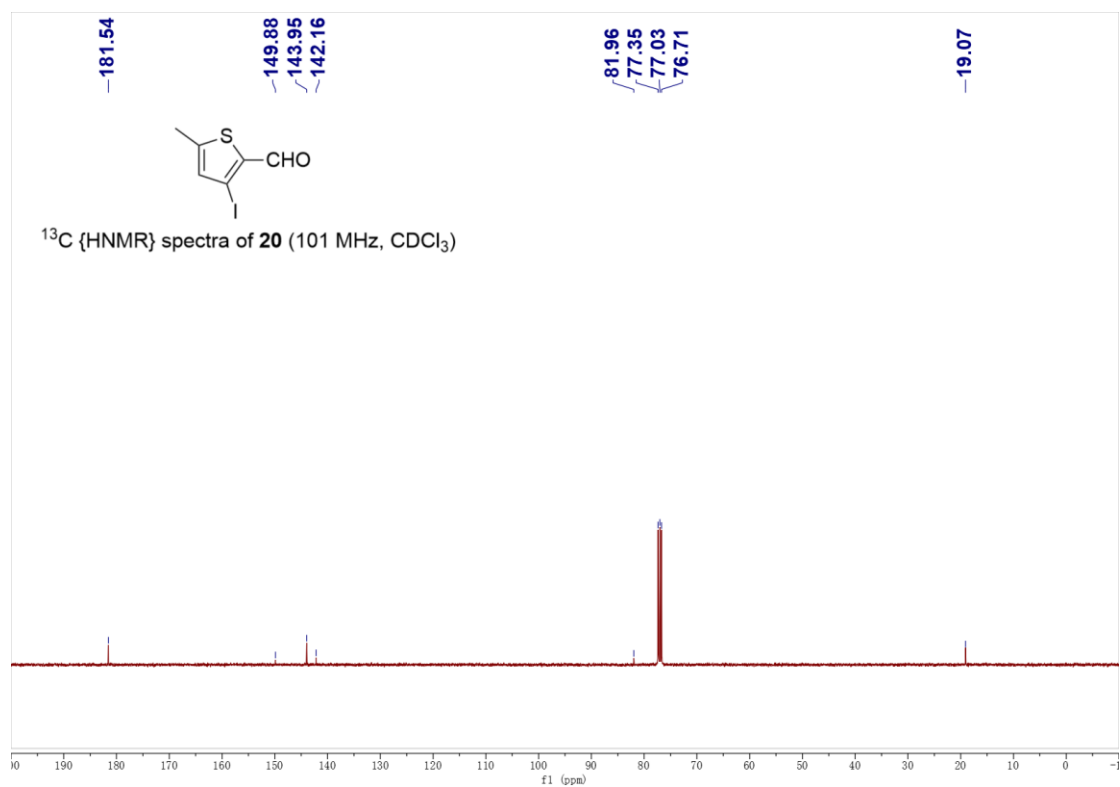

### Elemental Composition Report

Page 1

#### Single Mass Analysis

Tolerance = 5.0 mDa / DBE: min = -1.5, max = 50.0

Element prediction: Off

Number of isotope peaks used for i-FIT = 3

Monoisotopic Mass, Even Electron Ions

72 formula(e) evaluated with 1 results within limits (up to 50 best isotopic matches for each mass)

Elements Used:

C: 6-6 H: 6-6 N: 0-200 O: 0-100 Na: 0-2 S: 1-2 I: 1-2

6

231208-3-8 16 (0.082)

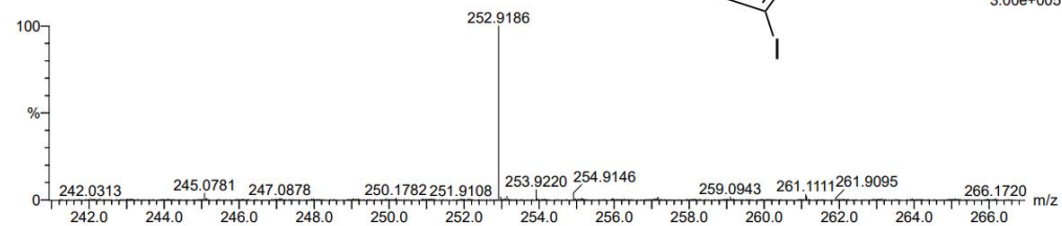

Minimum: -1.5  
Maximum: 5.0 10.0 50.0

| Mass     | Calc. Mass | mDa | PPM | DBE | i-FIT | Norm | Conf (%) | Formula     |
|----------|------------|-----|-----|-----|-------|------|----------|-------------|
| 252.9186 | 252.9184   | 0.2 | 0.8 | 3.5 | 949.5 | n/a  | n/a      | C6 H6 O S I |

8.457  
8.452  
8.029  
8.023  
8.007  
8.002  
7.260  
6.841  
6.819

3.940  
3.888

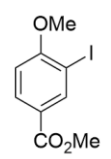

<sup>1</sup>H NMR spectra of 21 (400 MHz, CDCl<sub>3</sub>)

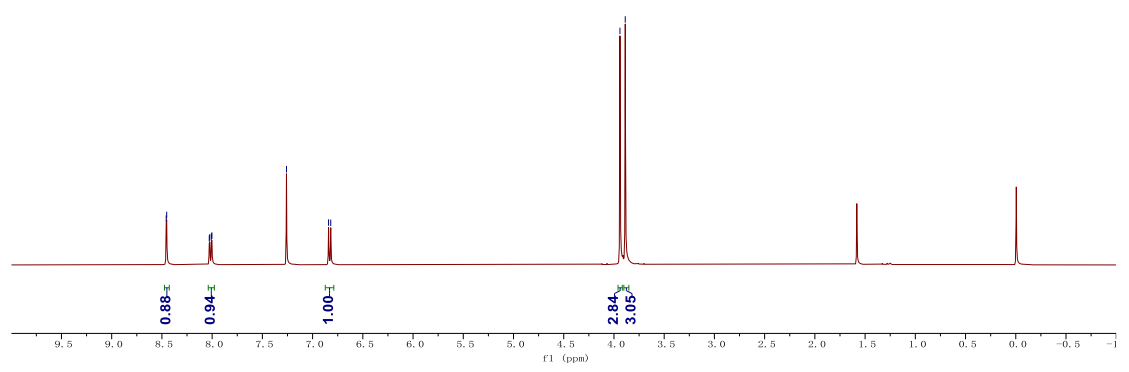

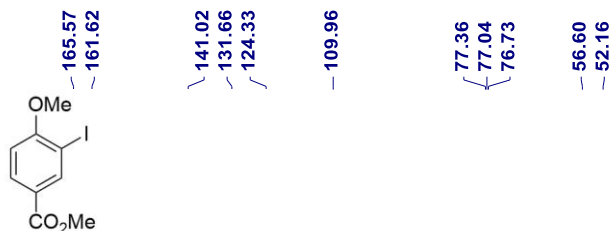

<sup>13</sup>C {HNMR} spectra of **21** (101 MHz, CDCl<sub>3</sub>)

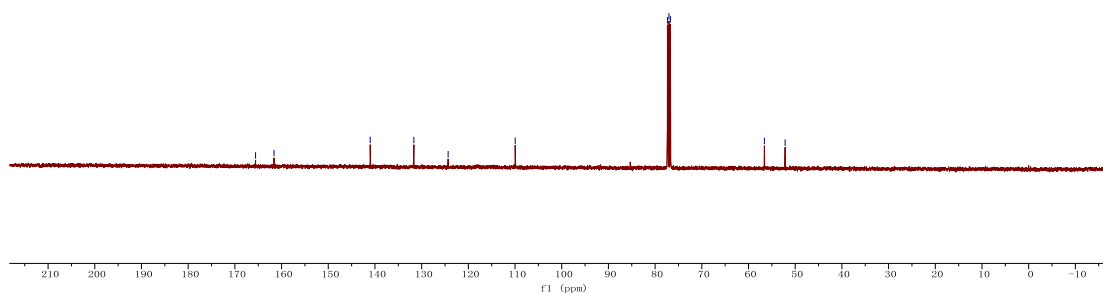

## Elemental Composition Report

Page 1

### Single Mass Analysis

Tolerance = 5.0 mDa / DBE: min = -1.5, max = 50.0

Element prediction: Off

Number of isotope peaks used for i-FIT = 3

Monoisotopic Mass, Even Electron Ions

120 formula(e) evaluated with 1 results within limits (up to 50 best isotopic matches for each mass)

Elements Used:

C: 9-9 H: 10-10 N: 0-10 O: 0-100 Na: 0-1 I: 1-7

12  
240405-1-21 11 (0.076)

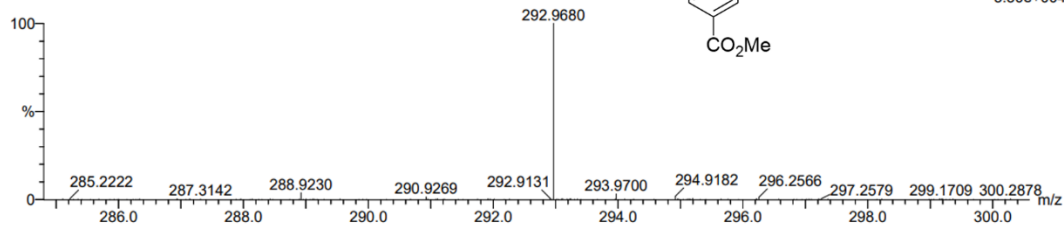

1: TOF MS ES+  
3.50e+004

Minimum: -1.5  
Maximum: 5.0 10.0 50.0

| Mass     | Calc. Mass | mDa | PPM | DBE | i-FIT | Norm | Conf(%) | Formula     |
|----------|------------|-----|-----|-----|-------|------|---------|-------------|
| 292.9680 | 292.9675   | 0.5 | 1.7 | 4.5 | 220.3 | n/a  | n/a     | C9 H10 O3 I |



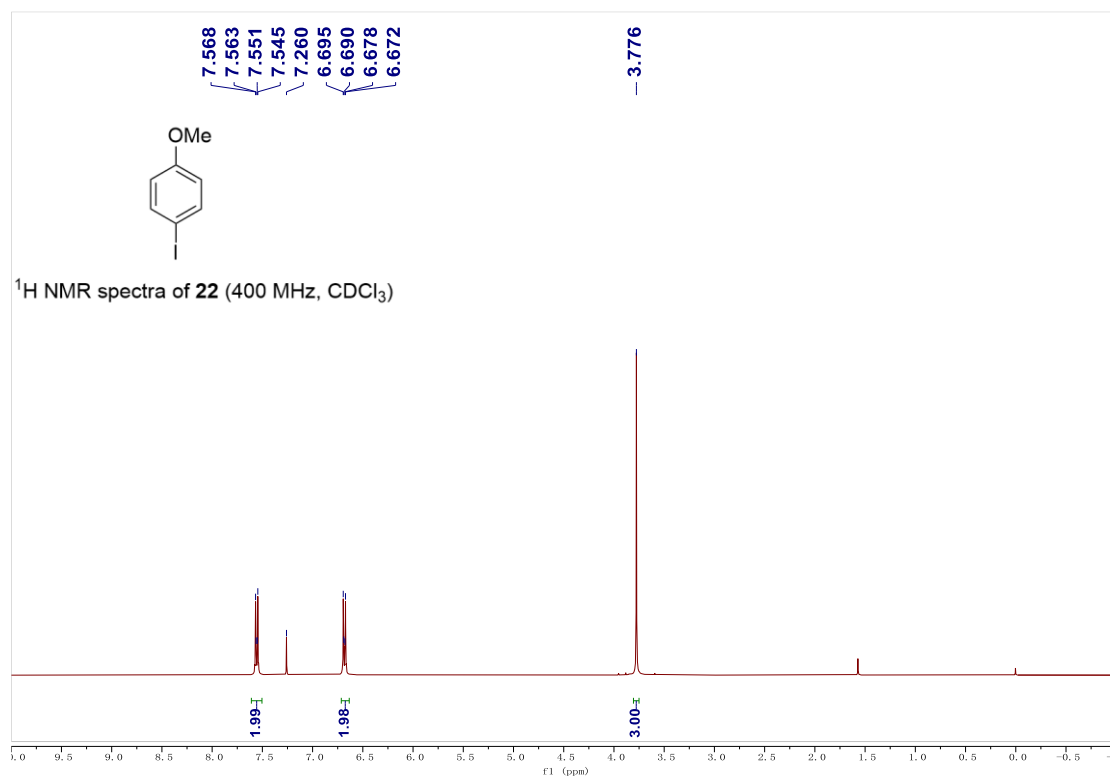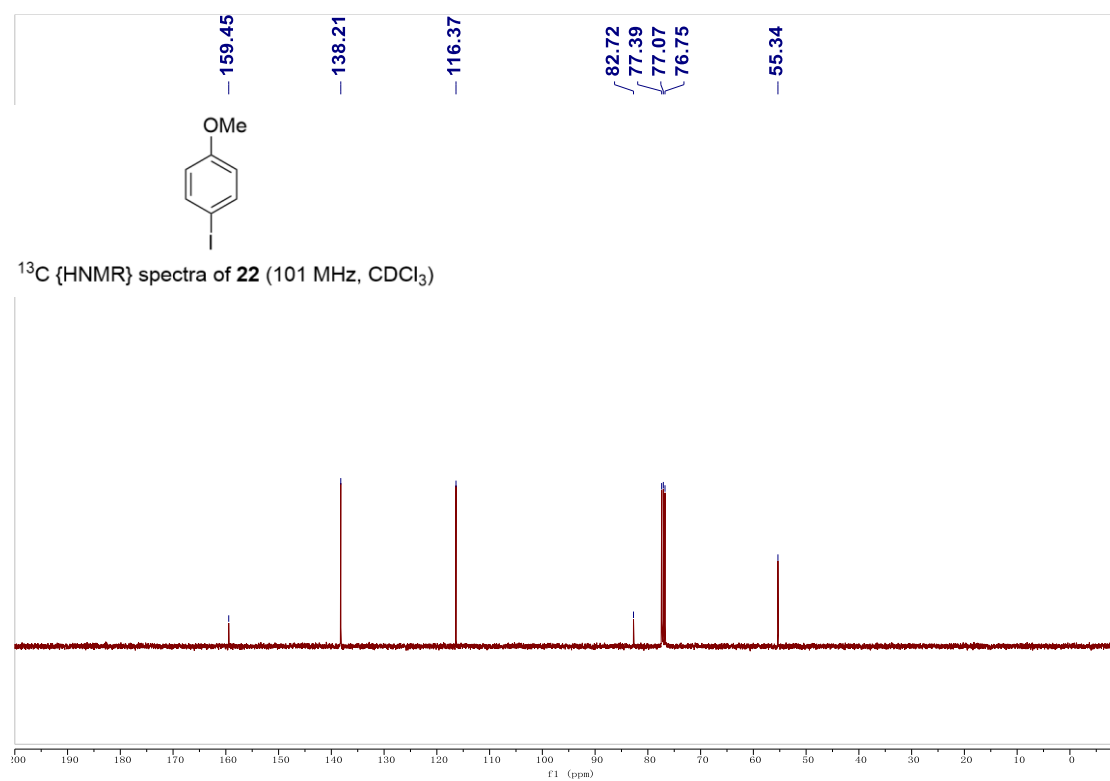

## Elemental Composition Report

Page 1

### Single Mass Analysis

Tolerance = 5.0 mDa / DBE: min = -1.5, max = 50.0

Element prediction: Off

Number of isotope peaks used for i-FIT = 3

Monoisotopic Mass, Even Electron Ions

72 formula(e) evaluated with 1 results within limits (up to 50 best isotopic matches for each mass)

Elements Used:

C: 7-7 H: 7-7 N: 0-10 O: 0-100 Na: 0-1 I: 1-7

12

240405-1-26 35 (0.162)

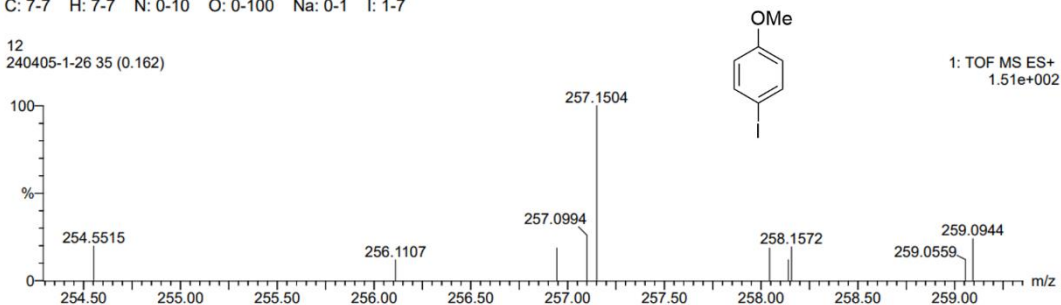

1: TOF MS ES+  
1.51e+002

Minimum: -1.5  
Maximum: 5.0 10.0 50.0

| Mass     | Calc. Mass | mDa | PPM | DBE | i-FIT | Norm | Conf (%) | Formula      |
|----------|------------|-----|-----|-----|-------|------|----------|--------------|
| 256.9444 | 256.9439   | 0.5 | 1.9 | 3.5 | 60.7  | n/a  | n/a      | C7 H7 O Na I |

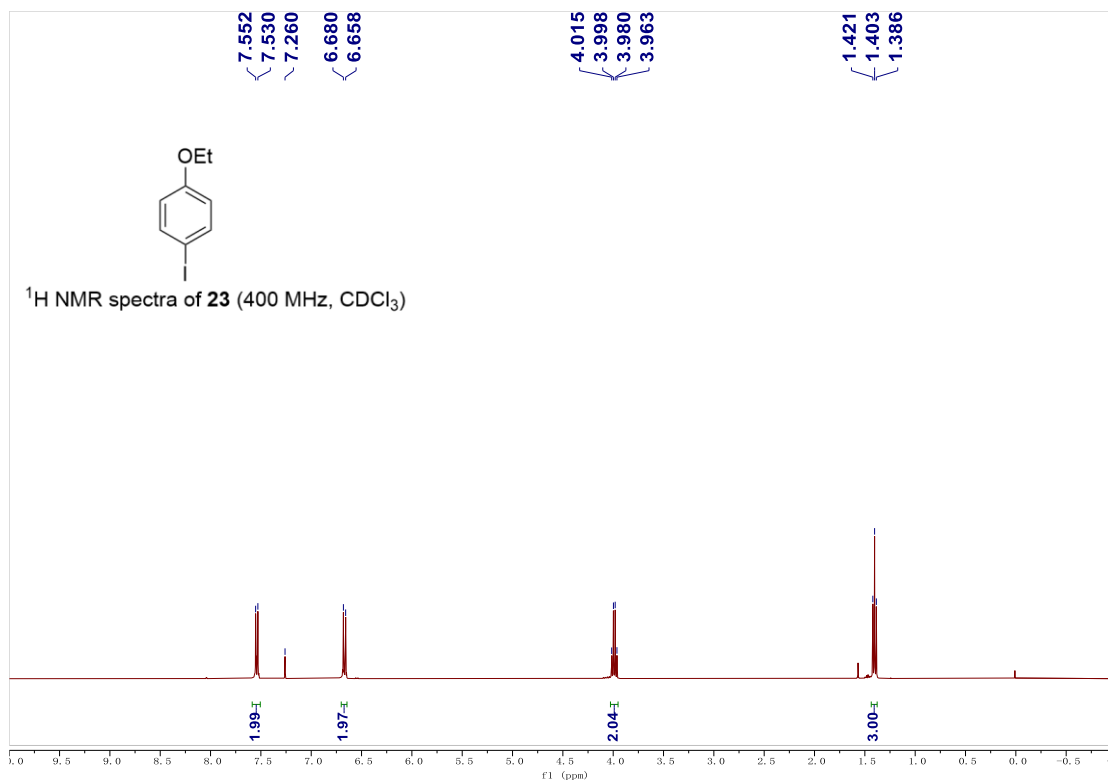

<sup>1</sup>H NMR spectra of **23** (400 MHz, CDCl<sub>3</sub>)

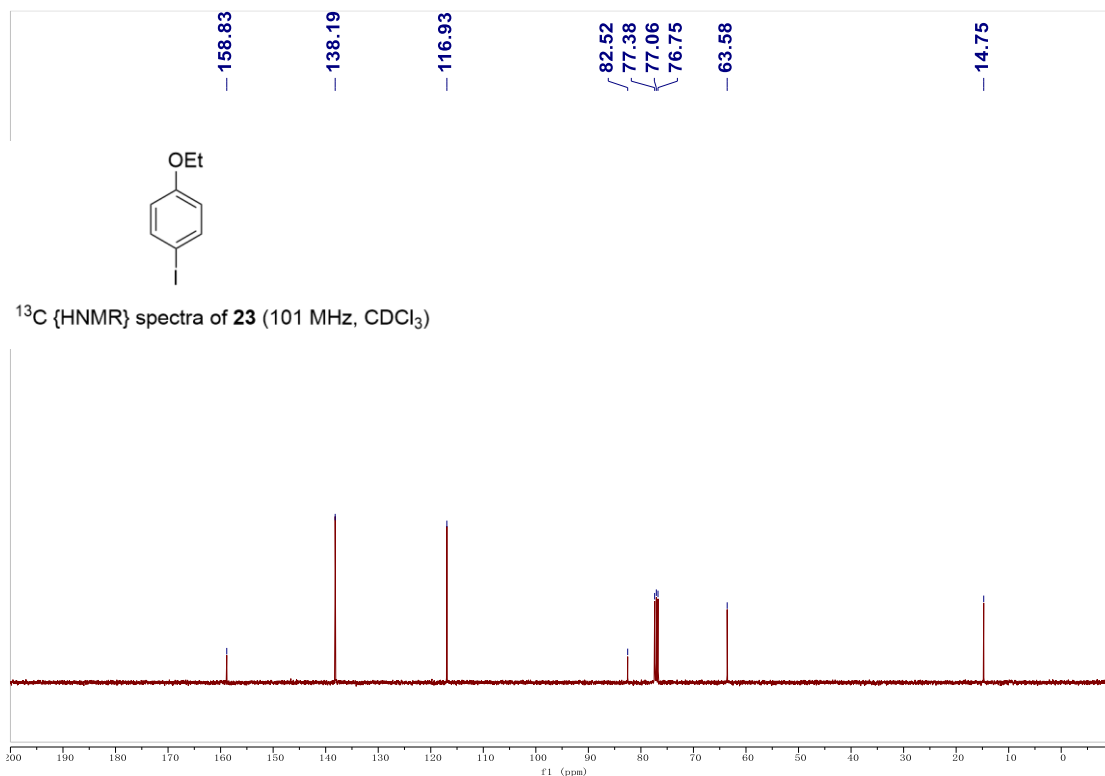

### Elemental Composition Report

Page 1

#### Single Mass Analysis

Tolerance = 5.0 mDa / DBE: min = -1.5, max = 50.0

Element prediction: Off

Number of isotope peaks used for i-FIT = 3

Monoisotopic Mass, Even Electron Ions

90 formula(e) evaluated with 1 results within limits (up to 50 best isotopic matches for each mass)

Elements Used:

C: 8-8 H: 9-9 N: 0-10 O: 0-100 Na: 0-1 I: 1-7

12  
240405-1-37 23 (0.119)

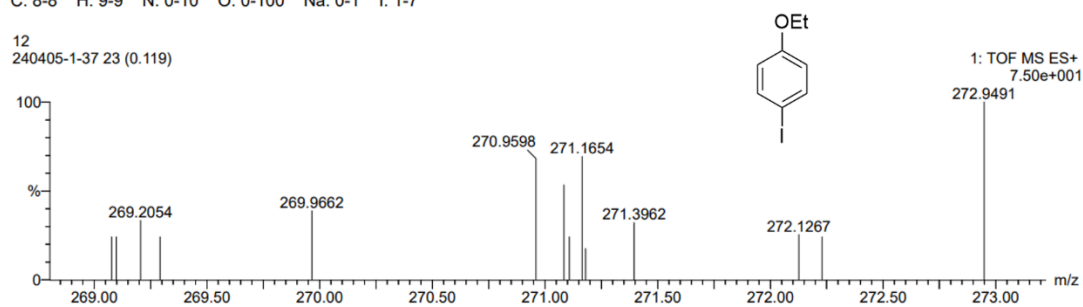

Minimum: -1.5  
Maximum: 50.0

| Mass     | Calc. Mass | mDa | PPM | DBE | i-FIT | Norm | Conf (%) | Formula      |
|----------|------------|-----|-----|-----|-------|------|----------|--------------|
| 270.9598 | 270.9596   | 0.2 | 0.7 | 3.5 | 66.1  | n/a  | n/a      | C8 H9 O Na I |

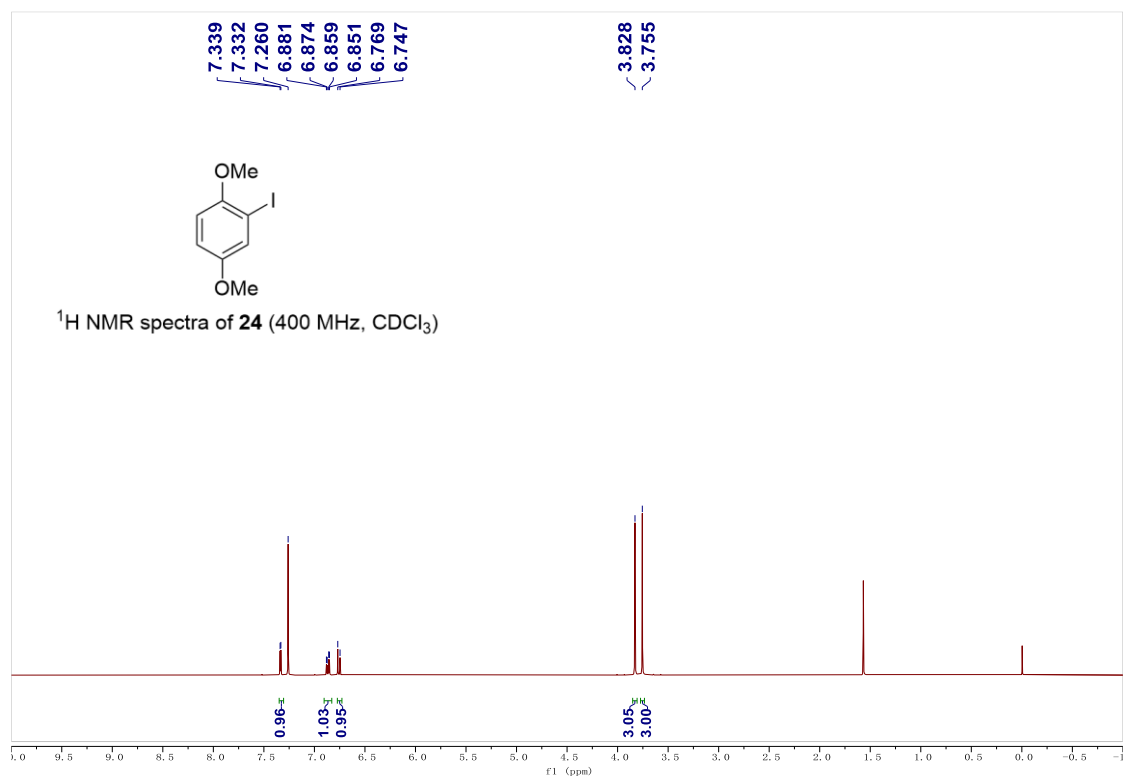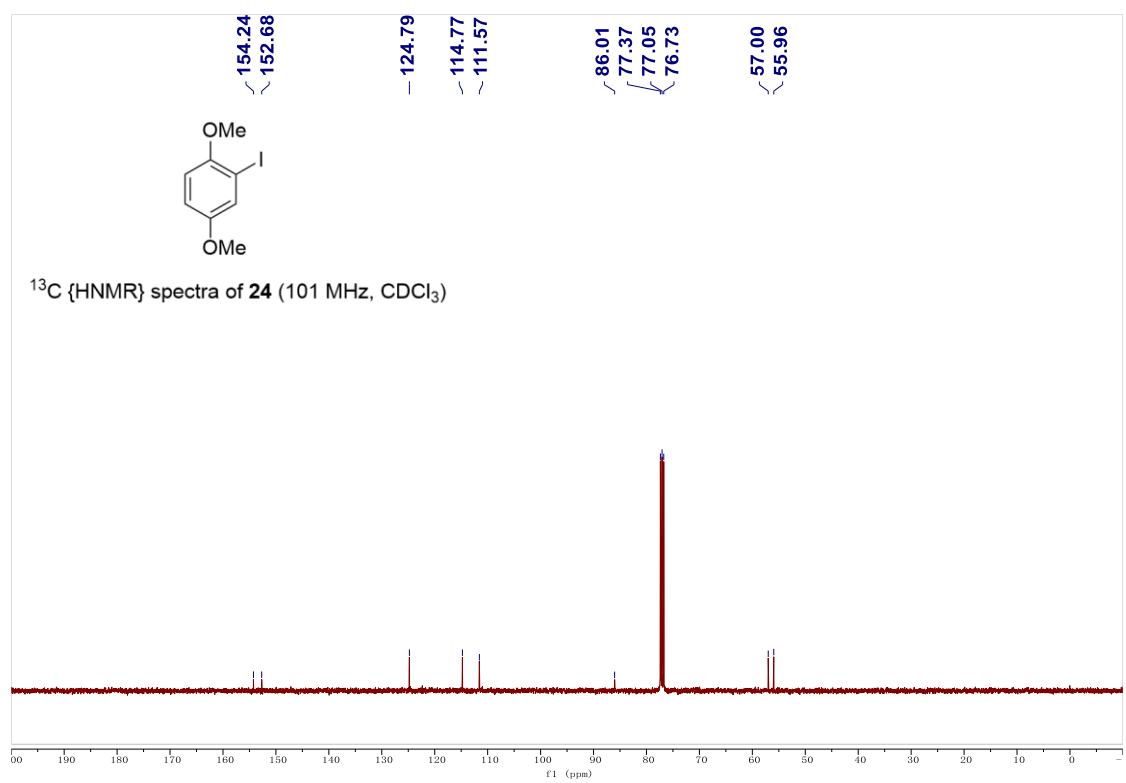

## Single Mass Analysis

Tolerance = 5.0 mDa / DBE: min = -1.5, max = 50.0

Element prediction: Off

Number of isotope peaks used for i-FIT = 3

Monoisotopic Mass, Even Electron Ions

80 formula(e) evaluated with 1 results within limits (up to 50 best isotopic matches for each mass)

Elements Used:

C: 8-8 H: 10-10 N: 0-10 O: 0-100 Na: 0-1 I: 1-7

12

240405-1-22 15 (0.090)

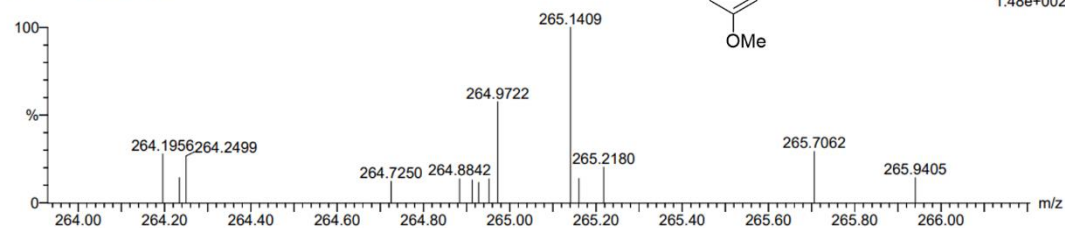

Minimum: -1.5  
Maximum: 5.0 10.0 50.0

| Mass     | Calc. Mass | mDa  | PPM  | DBE | i-FIT | Norm | Conf (%) | Formula     |
|----------|------------|------|------|-----|-------|------|----------|-------------|
| 264.9722 | 264.9725   | -0.3 | -1.1 | 3.5 | 48.2  | n/a  | n/a      | C8 H10 O2 I |

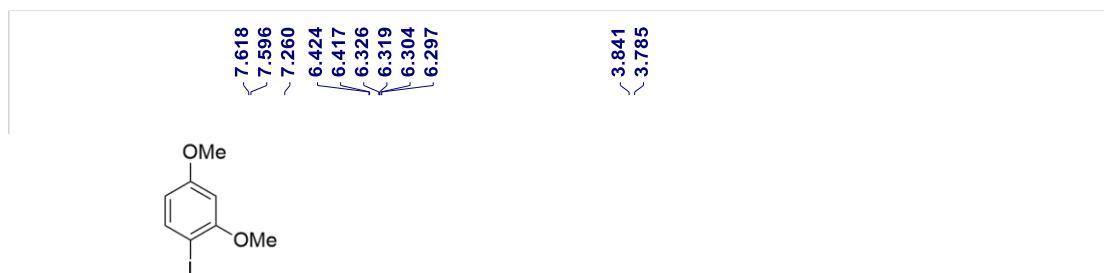<sup>1</sup>H NMR spectra of 25 (400 MHz, CDCl<sub>3</sub>)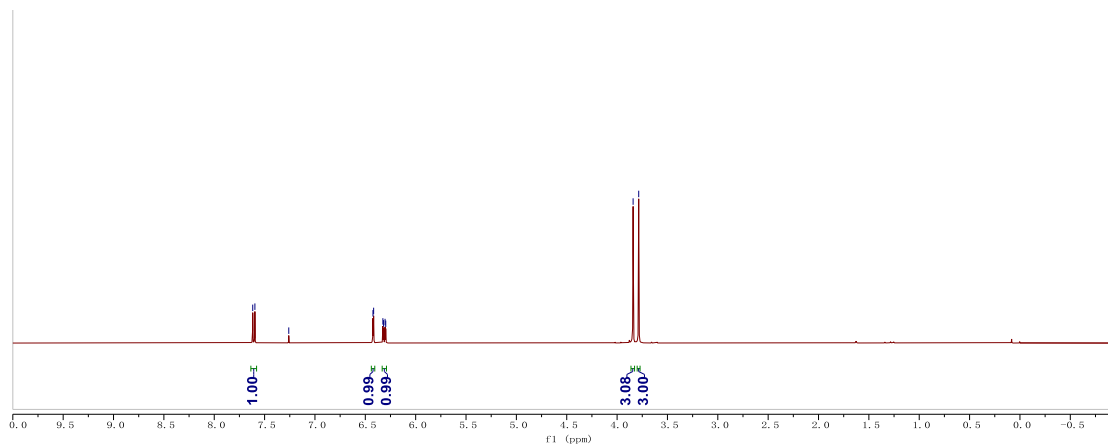

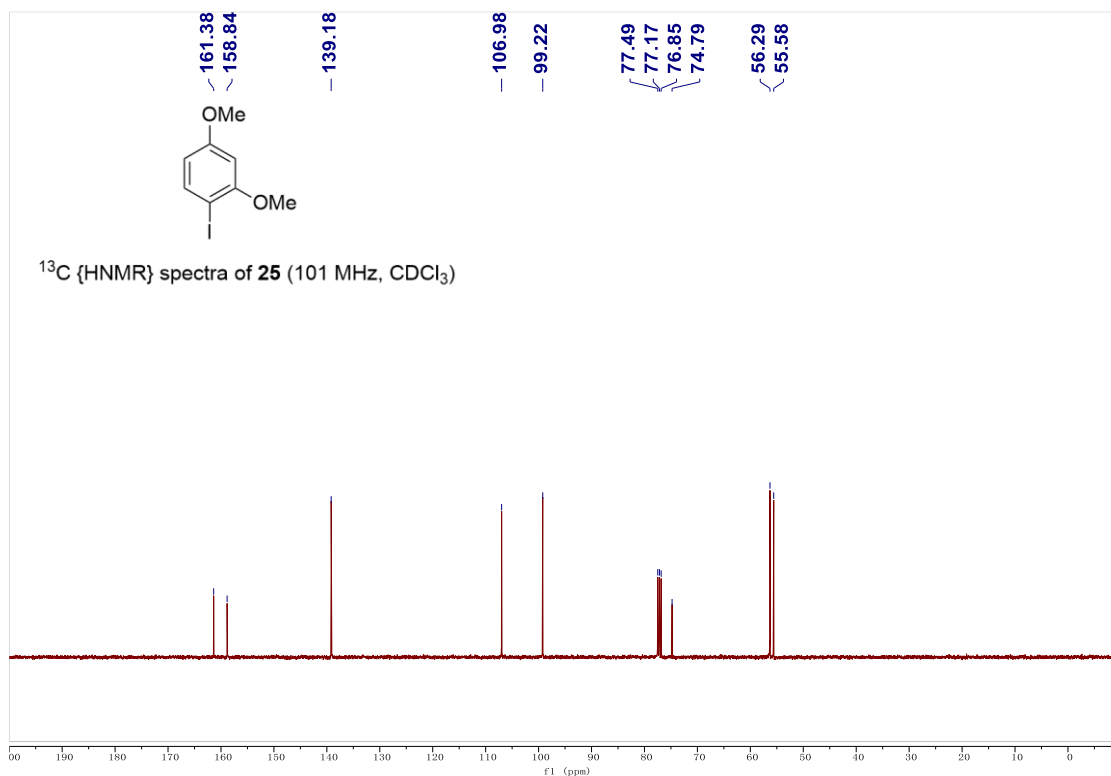

### Elemental Composition Report

Page 1

#### Single Mass Analysis

Tolerance = 5.0 mDa / DBE: min = -1.5, max = 50.0

Element prediction: Off

Number of isotope peaks used for i-FIT = 3

Monoisotopic Mass, Even Electron Ions

80 formula(e) evaluated with 1 results within limits (up to 50 best isotopic matches for each mass)

Elements Used:

C: 8-8 H: 10-10 N: 0-10 O: 0-100 Na: 0-1 I: 1-7

12

240405-1-23 14 (0.087)

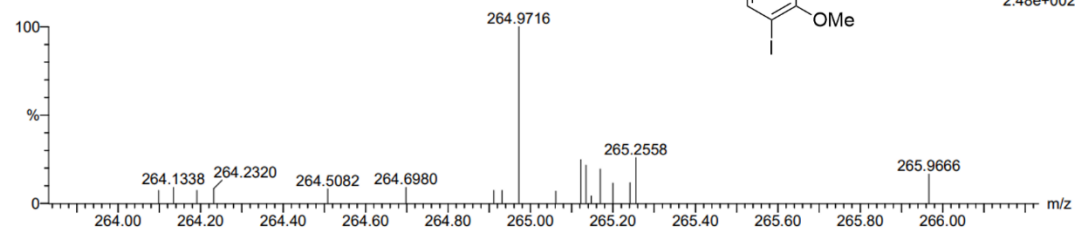

Minimum: -1.5  
Maximum: 5.0 10.0 50.0

| Mass     | Calc. Mass | mDa  | PPM  | DBE | i-FIT | Norm | Conf (%) | Formula     |
|----------|------------|------|------|-----|-------|------|----------|-------------|
| 264.9716 | 264.9725   | -0.9 | -3.4 | 3.5 | 71.0  | n/a  | n/a      | C8 H10 O2 I |

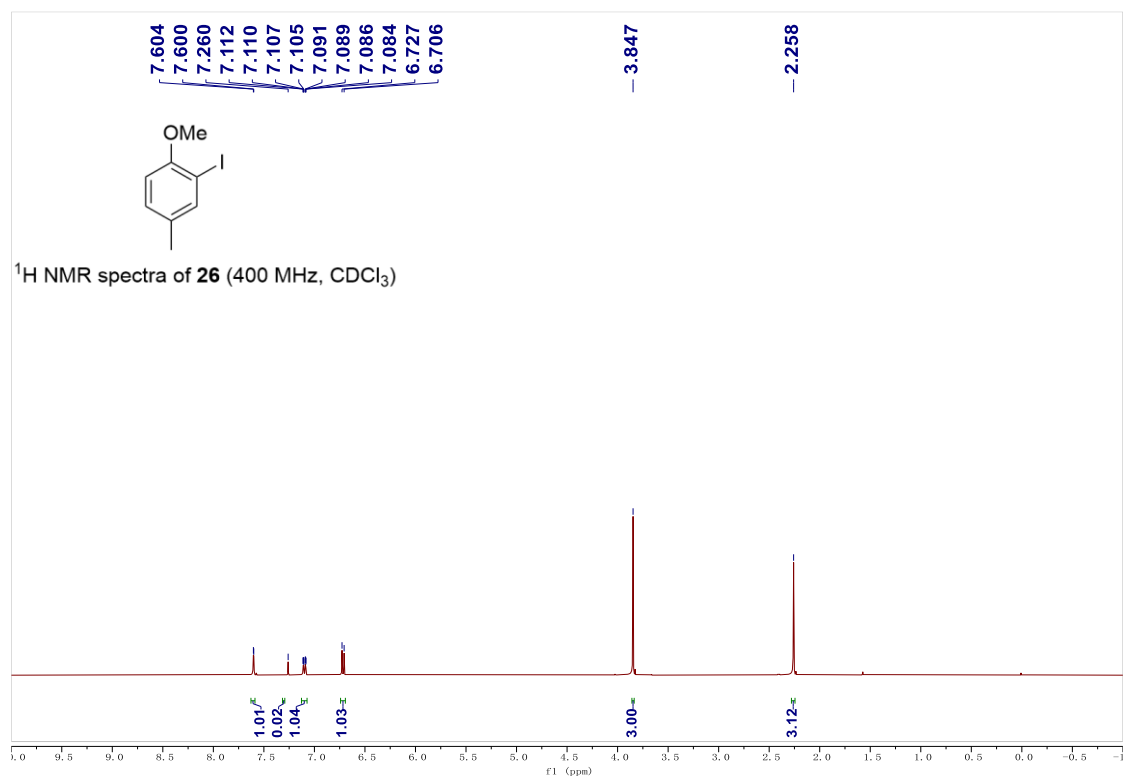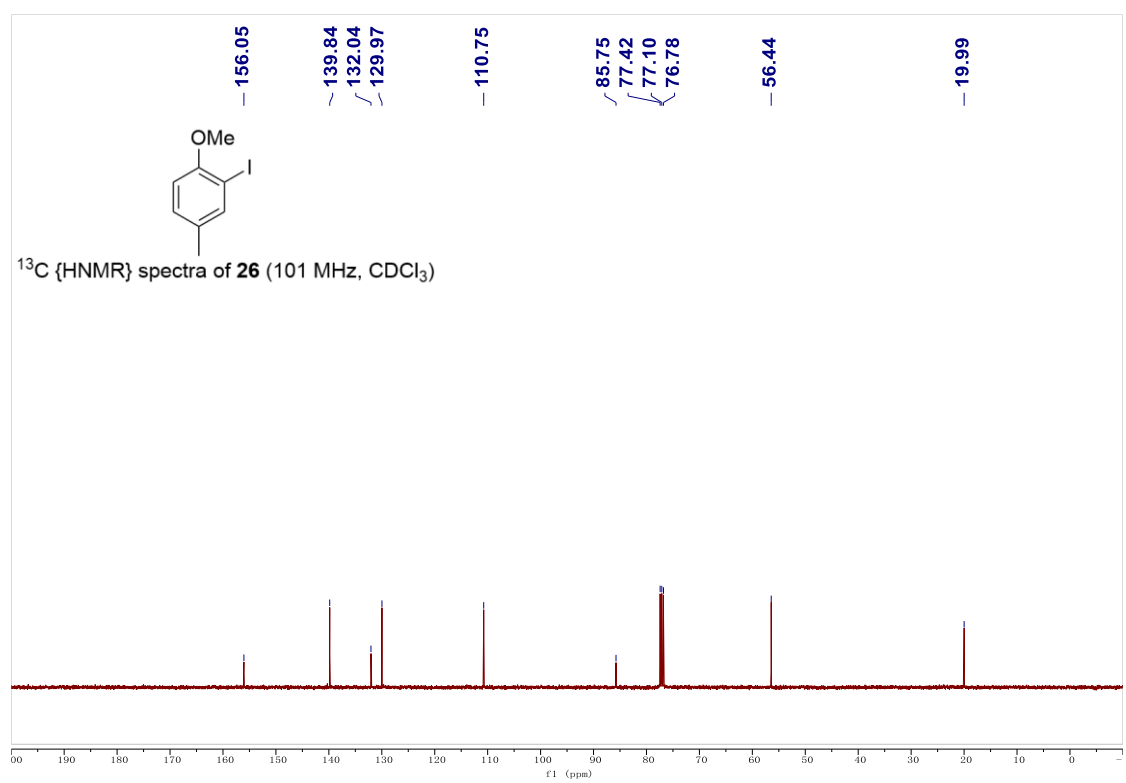

## Elemental Composition Report

Page 1

### Single Mass Analysis

Tolerance = 5.0 mDa / DBE: min = -1.5, max = 50.0

Element prediction: Off

Number of isotope peaks used for i-FIT = 3

Monoisotopic Mass, Even Electron Ions

90 formula(e) evaluated with 1 results within limits (up to 50 best isotopic matches for each mass)

Elements Used:

C: 8-8 H: 9-9 N: 0-10 O: 0-100 Na: 0-1 I: 1-7

12

240405-1-24 52 (0.242)

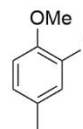

1: TOF MS ES+  
8.10e+001

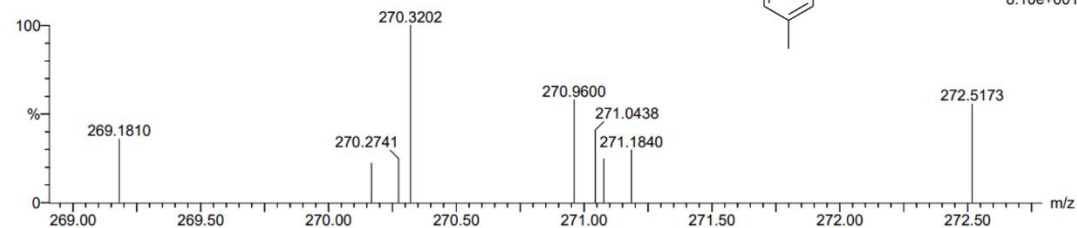

Minimum: -1.5  
Maximum: 5.0 10.0 50.0

| Mass     | Calc. Mass | mDa | PPM | DBE | i-FIT | Norm | Conf(%) | Formula      |
|----------|------------|-----|-----|-----|-------|------|---------|--------------|
| 270.9600 | 270.9596   | 0.4 | 1.5 | 3.5 | 39.5  | n/a  | n/a     | C8 H9 O Na I |

8.114  
8.111  
8.107  
8.104  
8.093  
8.089  
8.086  
7.857  
7.854  
7.836  
7.833  
7.787  
7.784  
7.767  
7.764  
7.606  
7.603  
7.589  
7.586  
7.582  
7.568  
7.565  
7.545  
7.542  
7.528  
7.525  
7.522  
7.508  
7.505  
7.206  
7.188  
7.186  
7.167

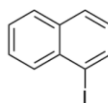

<sup>1</sup>H NMR spectra of 27 (400 MHz, CDCl<sub>3</sub>)

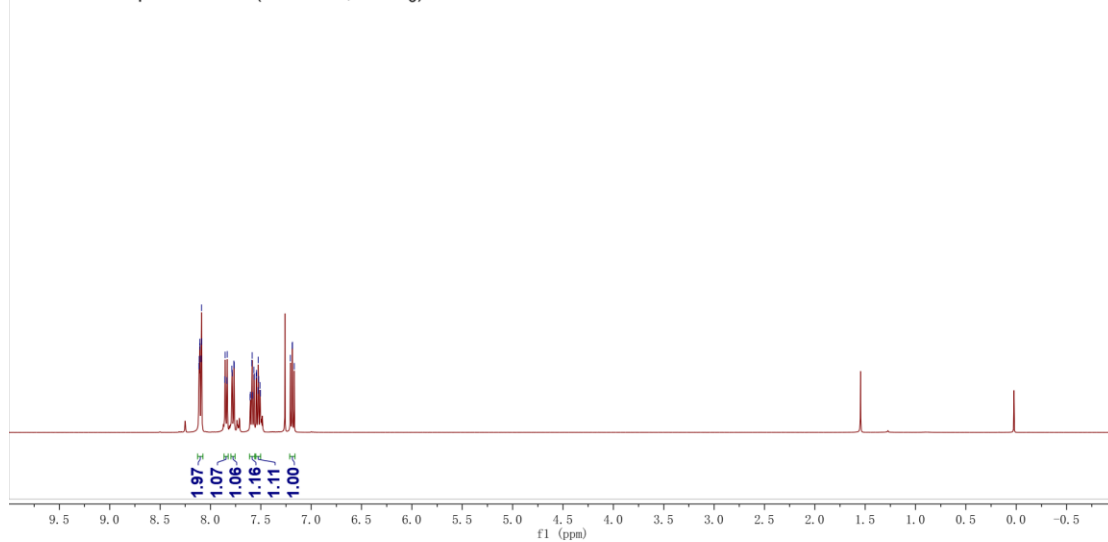



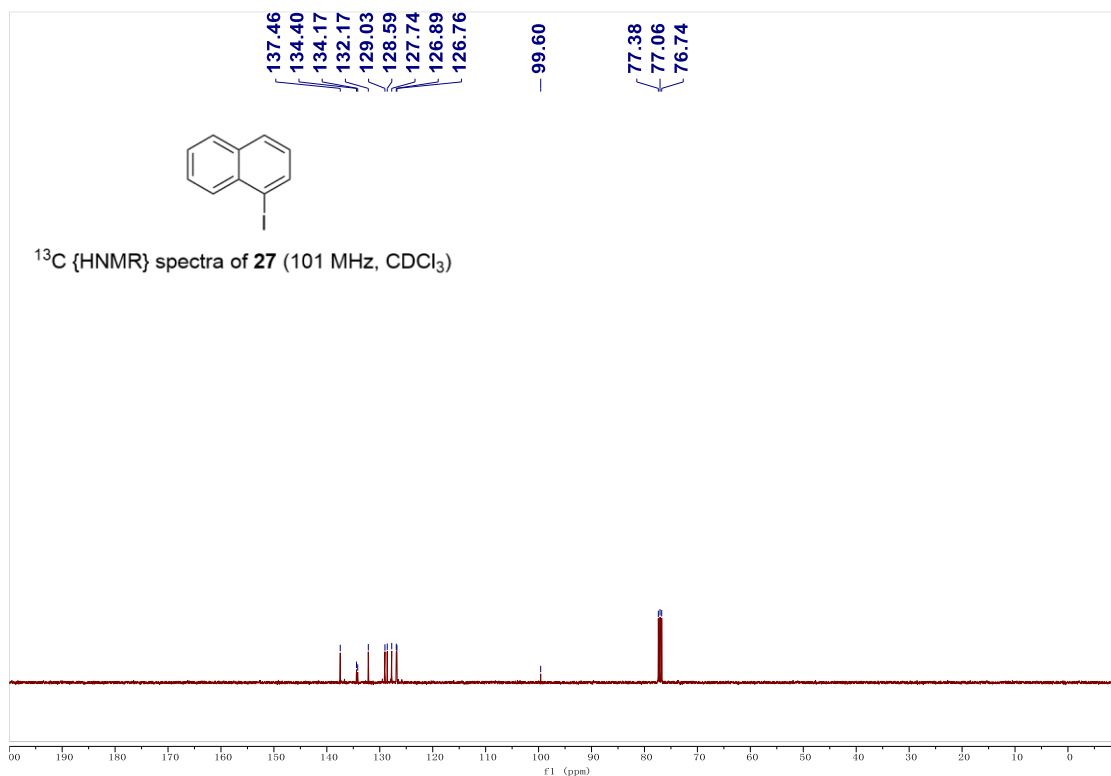

### Elemental Composition Report

Page 1

#### Single Mass Analysis

Tolerance = 5.0 mDa / DBE: min = -1.5, max = 50.0

Element prediction: Off

Number of isotope peaks used for i-FIT = 3

Monoisotopic Mass, Even Electron Ions

104 formula(e) evaluated with 1 results within limits (up to 50 best isotopic matches for each mass)

Elements Used:

C: 10-10 H: 7-7 N: 0-10 O: 0-100 Na: 0-1 I: 1-7

12

240405-1-35 9 (0.069)

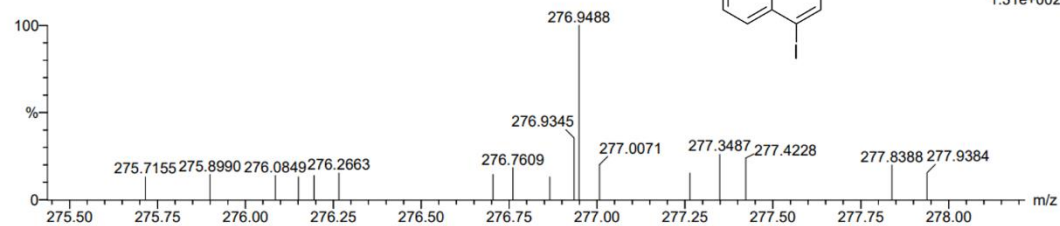

Minimum: -1.5  
Maximum: 50.0

| Mass     | Calc. Mass | mDa  | PPM  | DBE | i-FIT | Norm | Conf(%) | Formula     |
|----------|------------|------|------|-----|-------|------|---------|-------------|
| 276.9488 | 276.9490   | -0.2 | -0.7 | 6.5 | 46.3  | n/a  | n/a     | C10 H7 Na I |

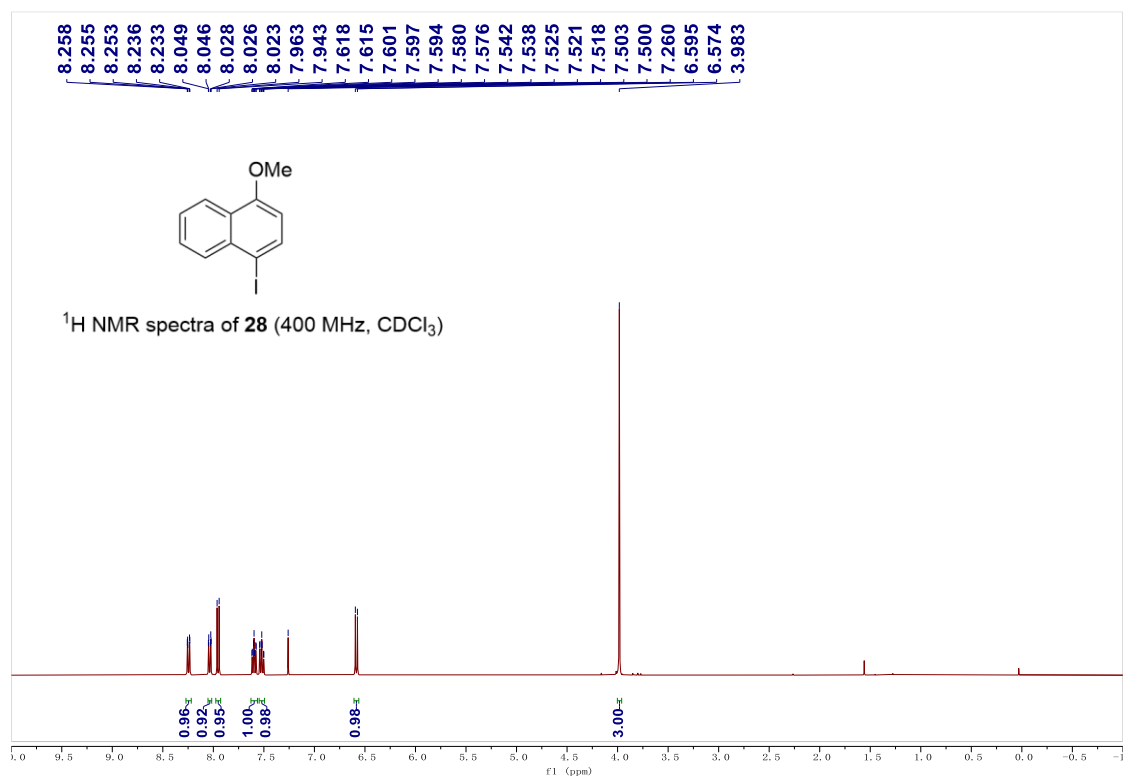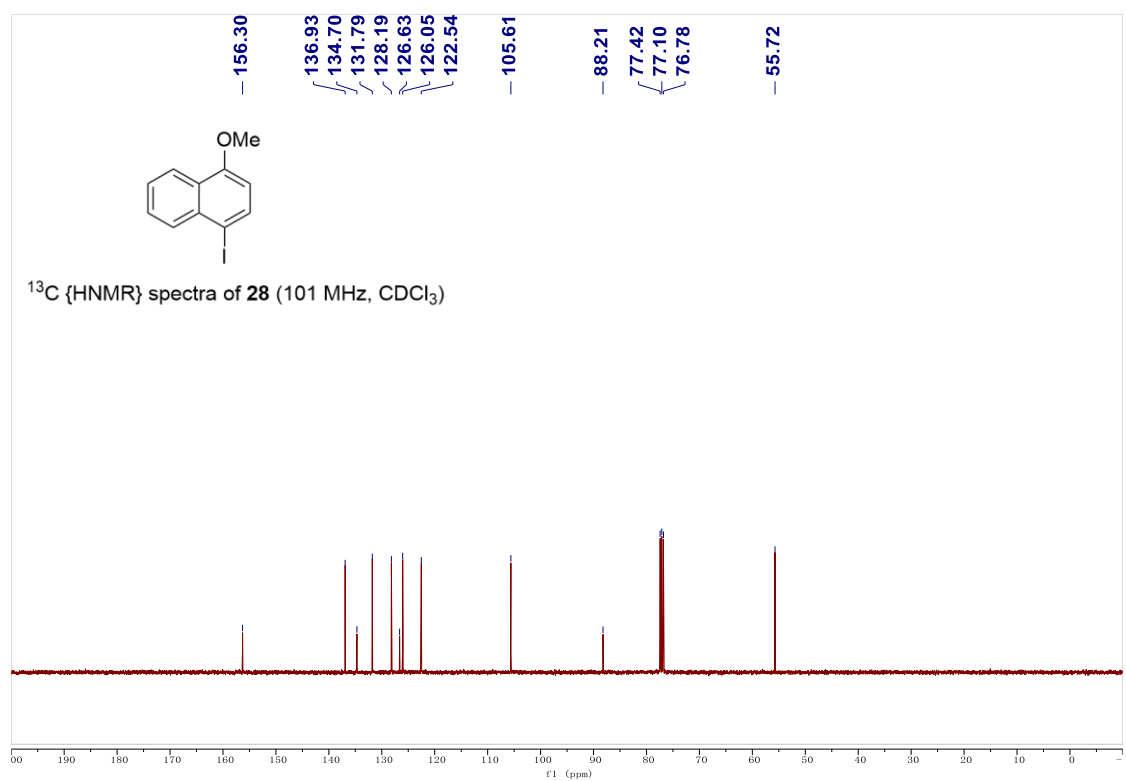

## Elemental Composition Report

Page 1

### Single Mass Analysis

Tolerance = 5.0 mDa / DBE: min = -1.5, max = 50.0

Element prediction: Off

Number of isotope peaks used for i-FIT = 3

Monoisotopic Mass, Even Electron Ions

117 formula(e) evaluated with 1 results within limits (up to 50 best isotopic matches for each mass)

Elements Used:

C: 11-11 H: 10-10 N: 0-10 O: 0-100 Na: 0-1 I: 1-7

12

240405-1-25 18 (0.101)

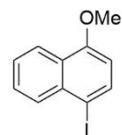

1: TOF MS ES+  
1.56e+002

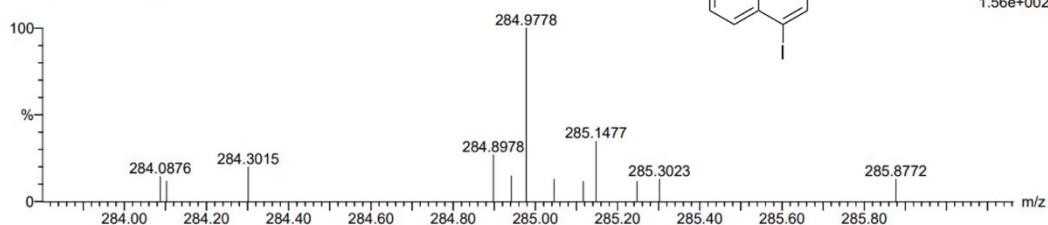

Minimum: -1.5  
Maximum: 5.0 10.0 50.0

| Mass     | Calc. Mass | mDa | PPM | DBE | i-FIT | Norm | Conf (%) | Formula     |
|----------|------------|-----|-----|-----|-------|------|----------|-------------|
| 284.9778 | 284.9776   | 0.2 | 0.7 | 6.5 | 55.7  | n/a  | n/a      | C11 H10 O I |

9.141  
8.943  
8.016  
8.013  
7.995  
7.992  
7.917  
7.914  
7.896  
7.893  
7.821  
7.818  
7.804  
7.800  
7.796  
7.782  
7.779  
7.779  
7.693  
7.690  
7.676  
7.673  
7.670  
7.656  
7.653  
7.260

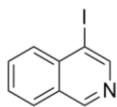

<sup>1</sup>H NMR spectra of **29** (400 MHz, CDCl<sub>3</sub>)

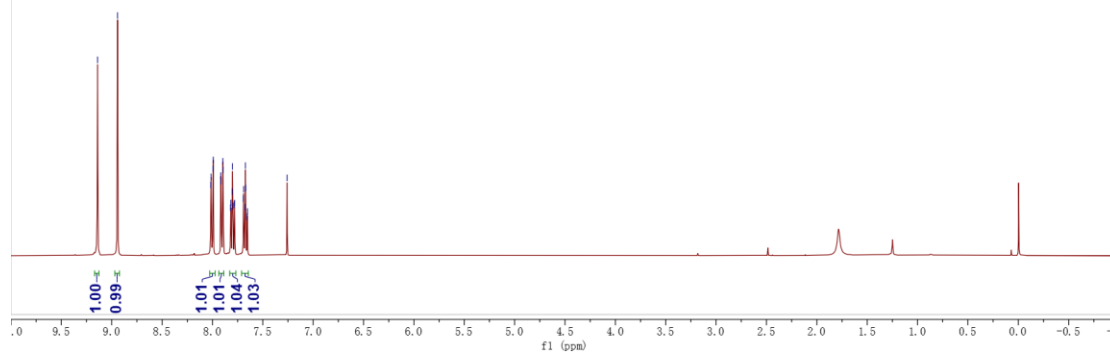

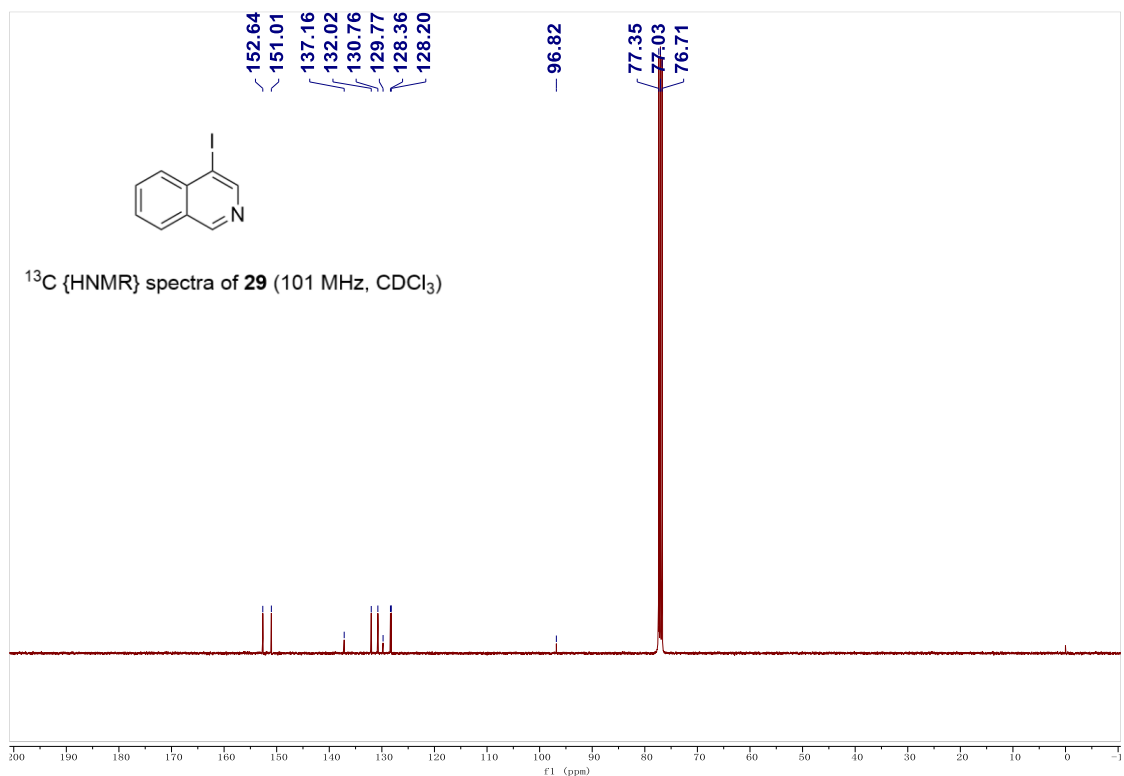

### Elemental Composition Report

Page 1

#### Single Mass Analysis

Tolerance = 5.0 mDa / DBE: min = -1.5, max = 50.0  
 Element prediction: Off  
 Number of isotope peaks used for i-FIT = 3

Monoisotopic Mass, Even Electron Ions

78 formula(e) evaluated with 1 results within limits (up to 50 best isotopic matches for each mass)

Elements Used:

C: 9-9 H: 7-7 N: 0-10 O: 0-100 Na: 0-1 I: 1-7

12

240405-1-38 29 (0.140)

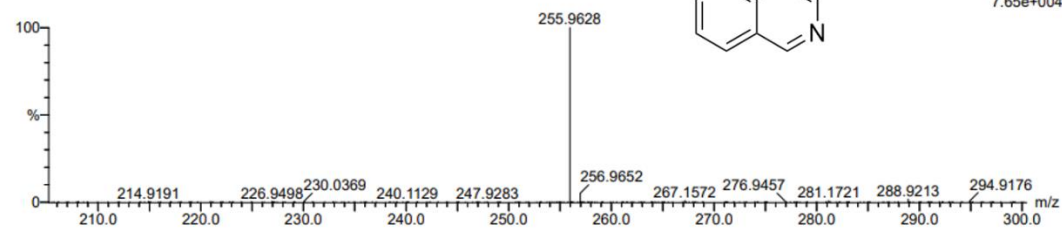

Minimum: -1.5  
 Maximum: 5.0 10.0 50.0

| Mass     | Calc. Mass | mDa | IPM | DBE | i-FIT | Norm | Conf (%) | Formula   |
|----------|------------|-----|-----|-----|-------|------|----------|-----------|
| 255.9628 | 255.9623   | 0.5 | 2.0 | 6.5 | 160.7 | n/a  | n/a      | C9 H7 N I |

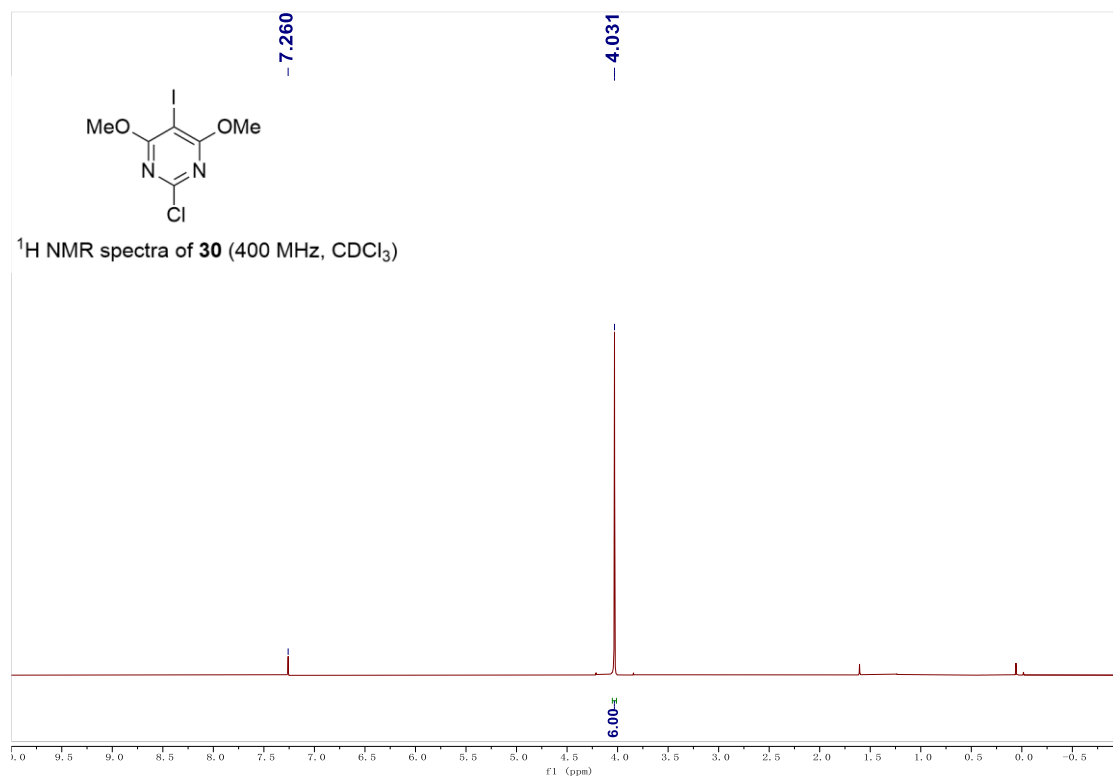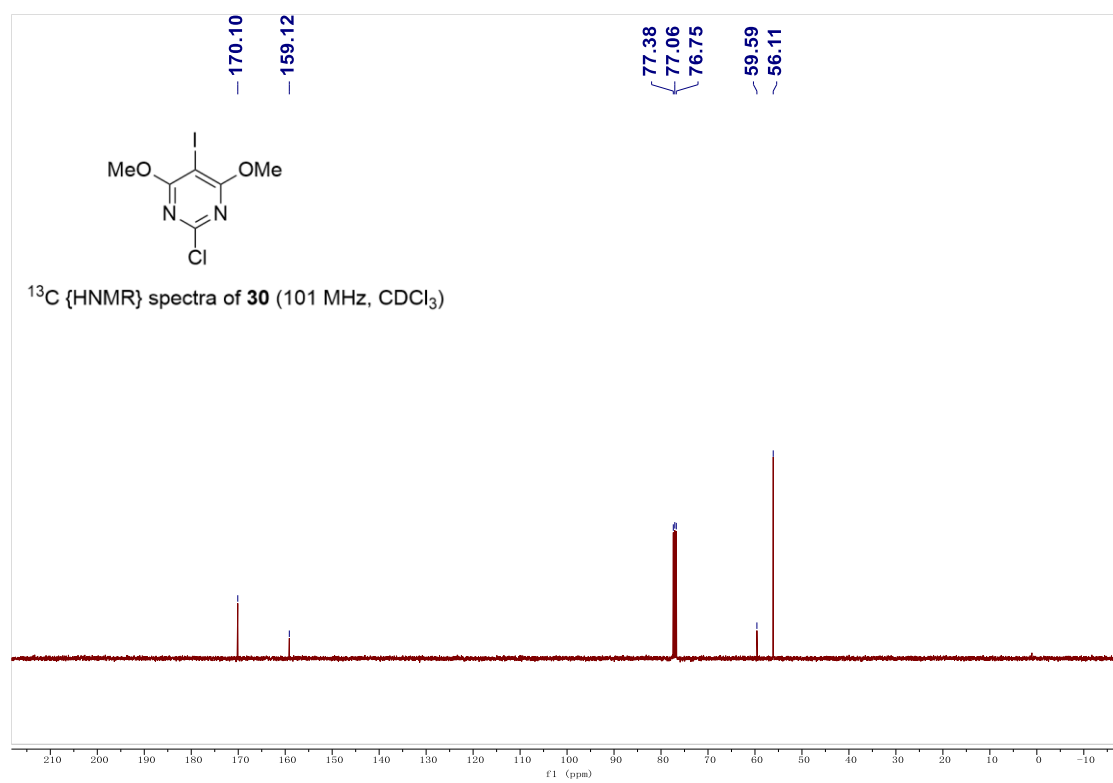

T-1 #1-202 RT: 0.00-1.96 AV: 202 NL: 2.28E6  
 T: FTMS + p ESI Full ms [50.0000-750.0000]

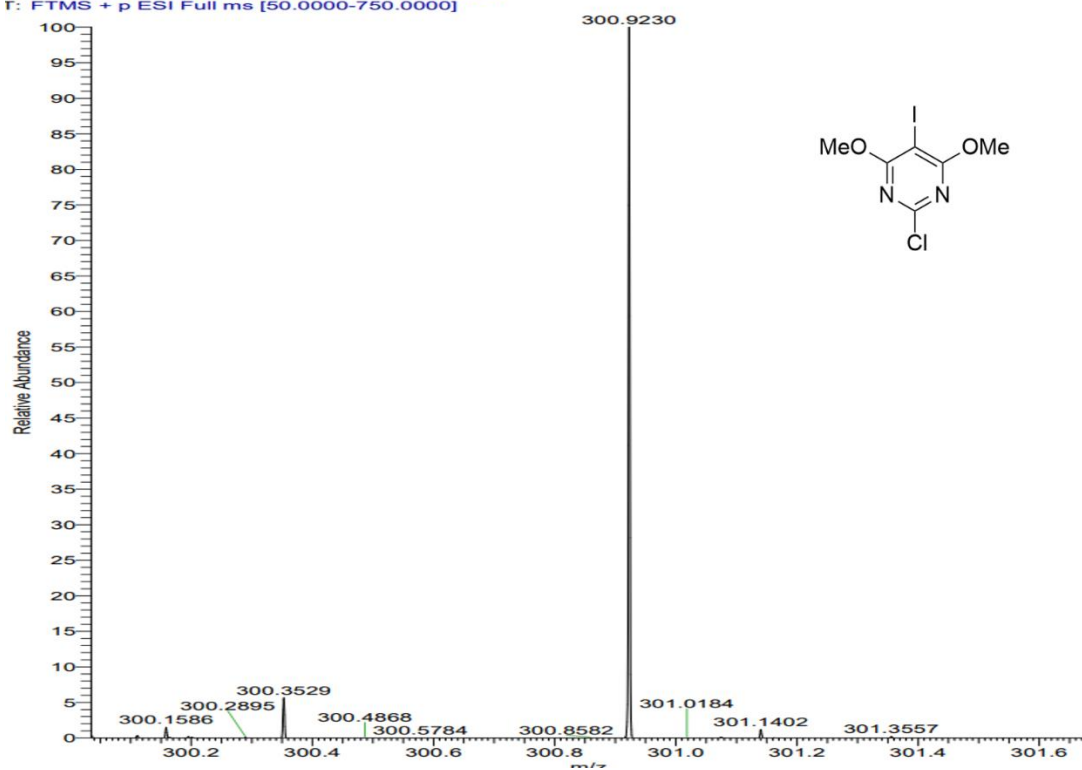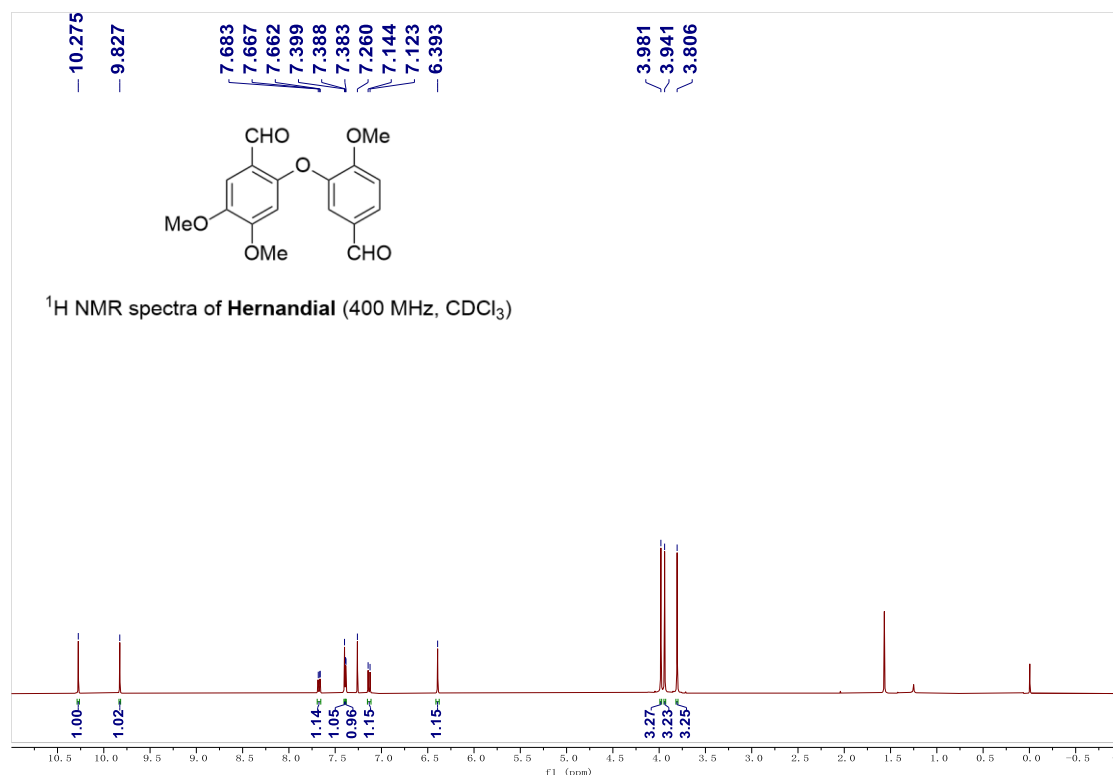

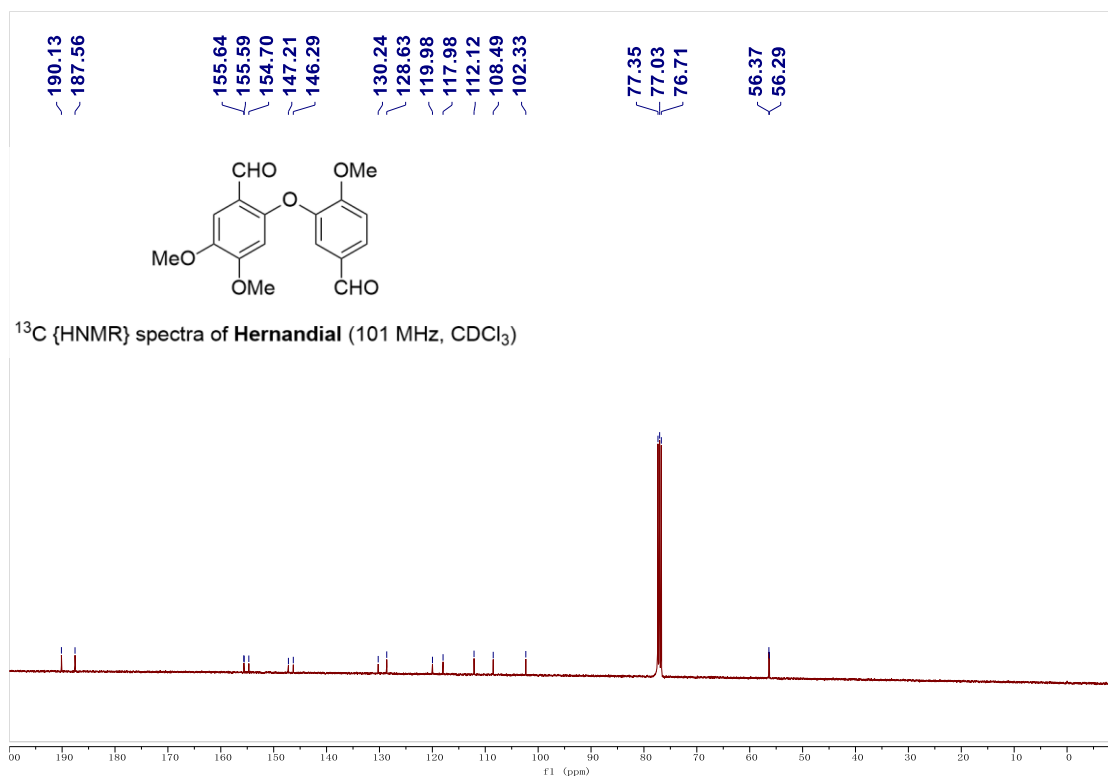

### Elemental Composition Report

Page 1

#### Single Mass Analysis

Tolerance = 5.0 mDa / DBE: min = -1.5, max = 50.0  
 Element prediction: Off  
 Number of isotope peaks used for i-FIT = 3

Monoisotopic Mass, Even Electron Ions

302 formula(e) evaluated with 1 results within limits (up to 50 best isotopic matches for each mass)

Elements Used:

C: 17-17 H: 16-16 N: 0-10 O: 0-100 Na: 0-1

12

240405-1-27 19 (0.105)

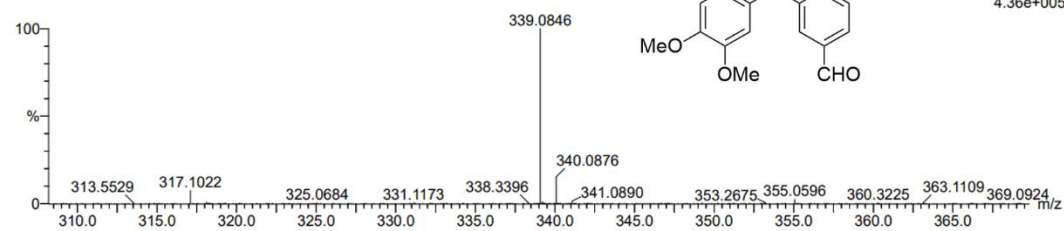

Minimum: -1.5  
Maximum: 50.0

| Mass     | Calc. Mass | mDa | PPM | DBE | i-FIT | Norm | Conf (%) | Formula       |
|----------|------------|-----|-----|-----|-------|------|----------|---------------|
| 339.0846 | 339.0845   | 0.1 | 0.3 | 9.5 | 453.2 | n/a  | n/a      | C17 H16 O6 Na |

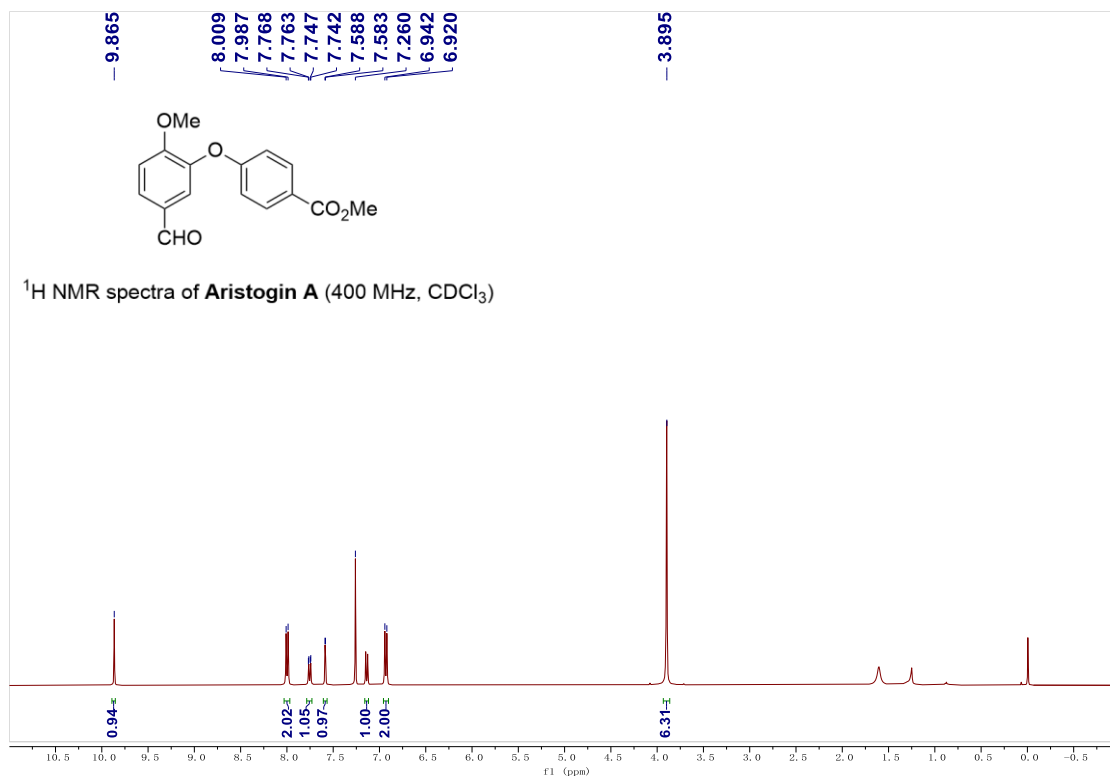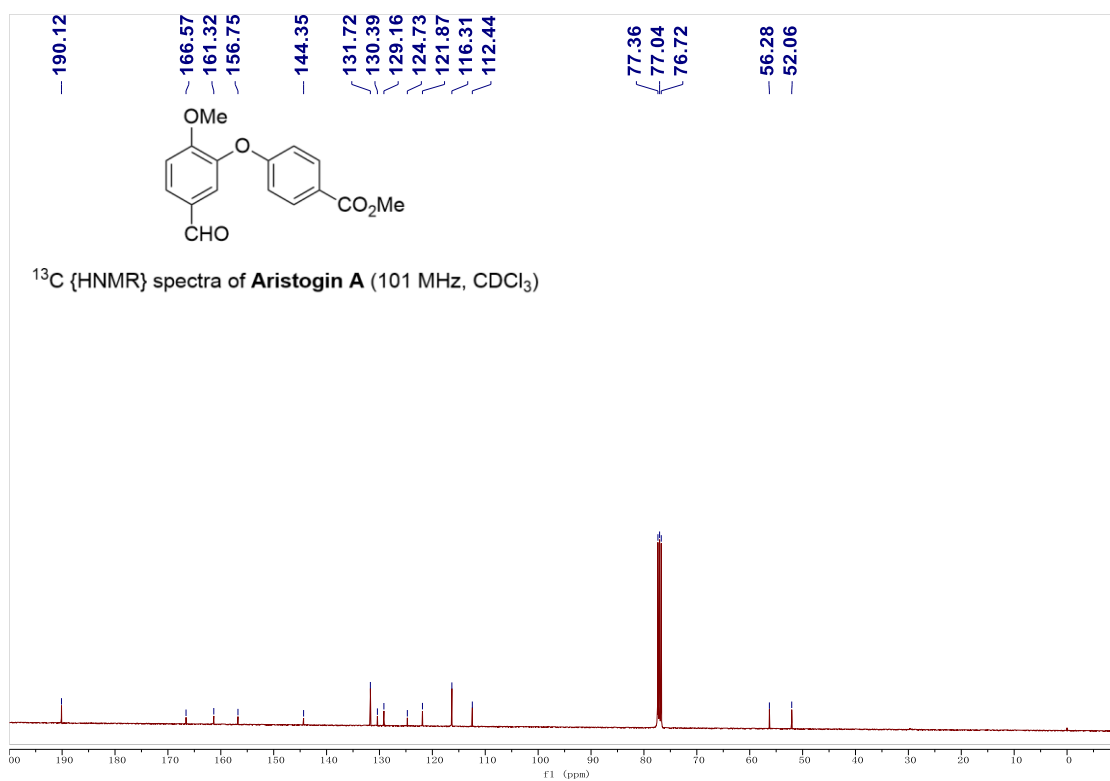



## Elemental Composition Report

Page 1

### Single Mass Analysis

Tolerance = 5.0 mDa / DBE: min = -1.5, max = 50.0

Element prediction: Off

Number of isotope peaks used for i-FIT = 3

Monoisotopic Mass, Even Electron Ions

387 formula(e) evaluated with 1 results within limits (up to 50 best isotopic matches for each mass)

Elements Used:

C: 16-16 H: 14-14 N: 0-100 O: 0-100 Na: 0-1

30

240411-3-28a 10 (0.072)

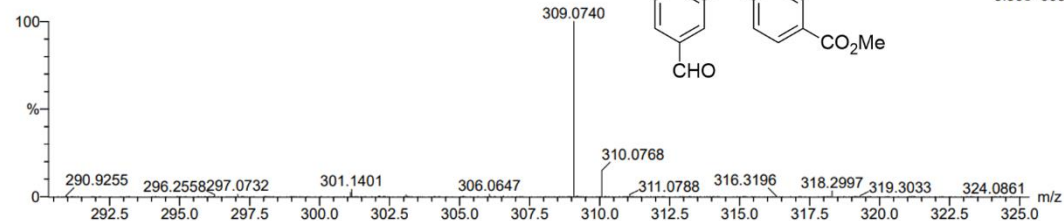

1: TOF MS ES+  
3.56e+005

Minimum: -1.5  
Maximum: 5.0 10.0 50.0

| Mass     | Calc. Mass | mDa | PPM | DBE | i-FIT | Norm | Conf (%) | Formula       |
|----------|------------|-----|-----|-----|-------|------|----------|---------------|
| 309.0740 | 309.0739   | 0.1 | 0.3 | 9.5 | 365.0 | n/a  | n/a      | C16 H14 O5 Na |

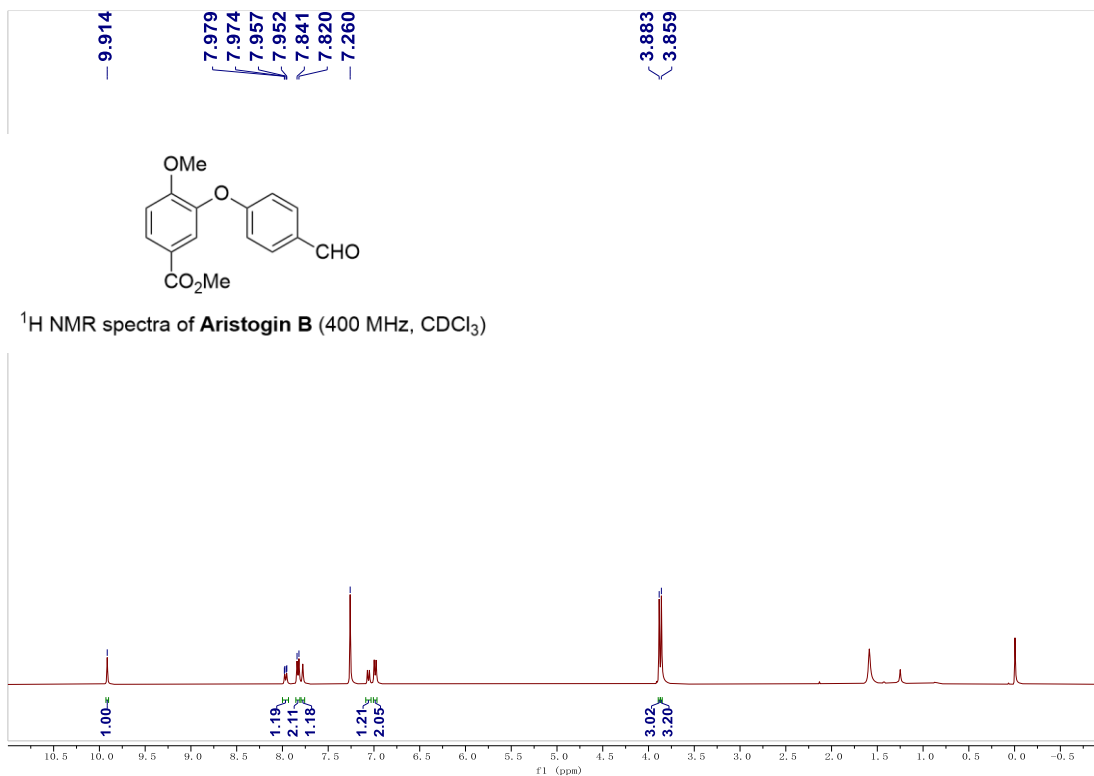

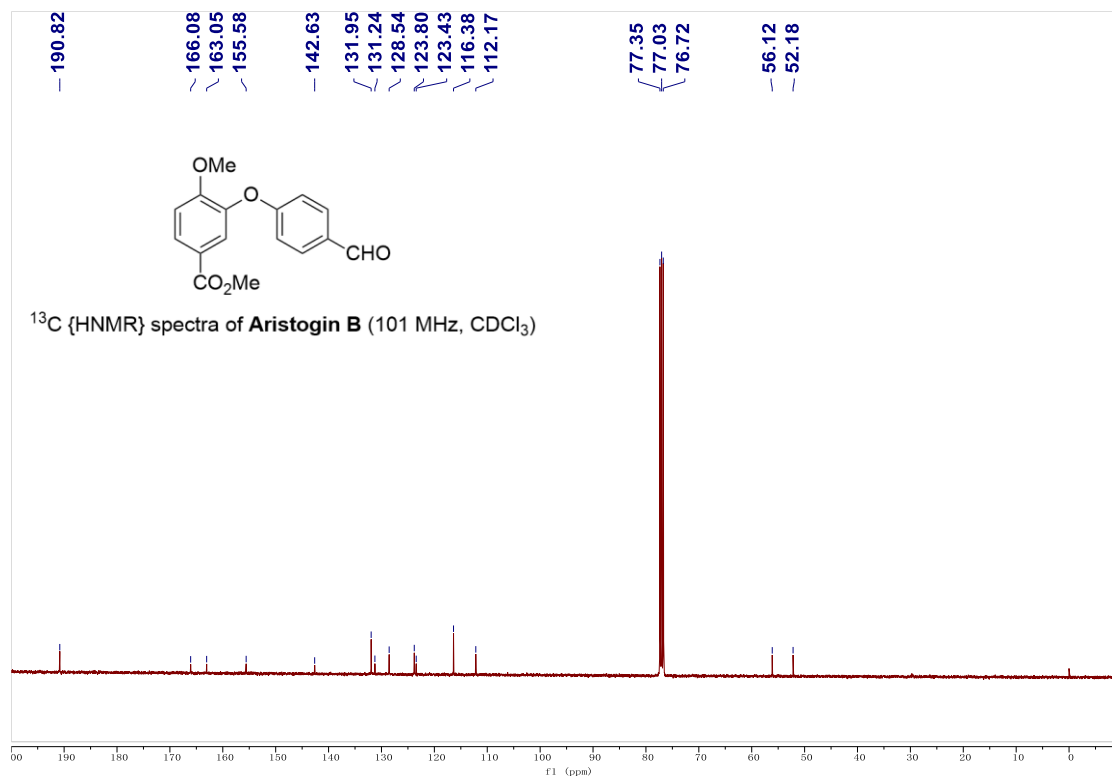

### Elemental Composition Report

Page 1

#### Single Mass Analysis

Tolerance = 5.0 mDa / DBE: min = -1.5, max = 50.0

Element prediction: Off

Number of isotope peaks used for i-FIT = 3

Monoisotopic Mass, Even Electron Ions

274 formula(e) evaluated with 1 results within limits (up to 50 best isotopic matches for each mass)

Elements Used:

C: 16-16 H: 14-14 N: 0-10 O: 0-100 Na: 0-1

12

240405-1-29 85 (0.360)

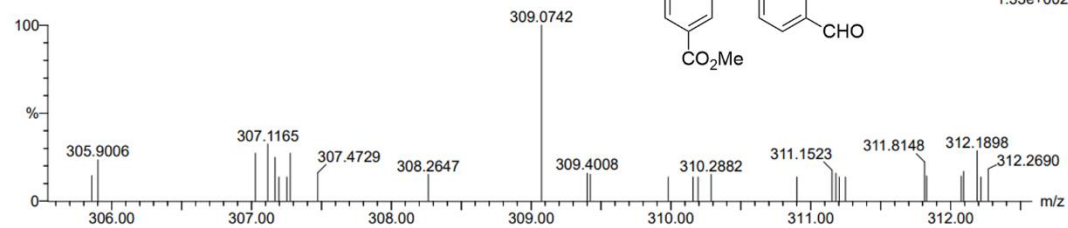

Minimum: -1.5  
Maximum: 50.0

| Mass     | Calc. Mass | mDa | PPM | DBE | i-FIT | Norm | Conf (%) | Formula       |
|----------|------------|-----|-----|-----|-------|------|----------|---------------|
| 309.0742 | 309.0739   | 0.3 | 1.0 | 9.5 | 75.8  | n/a  | n/a      | C16 H14 O5 Na |

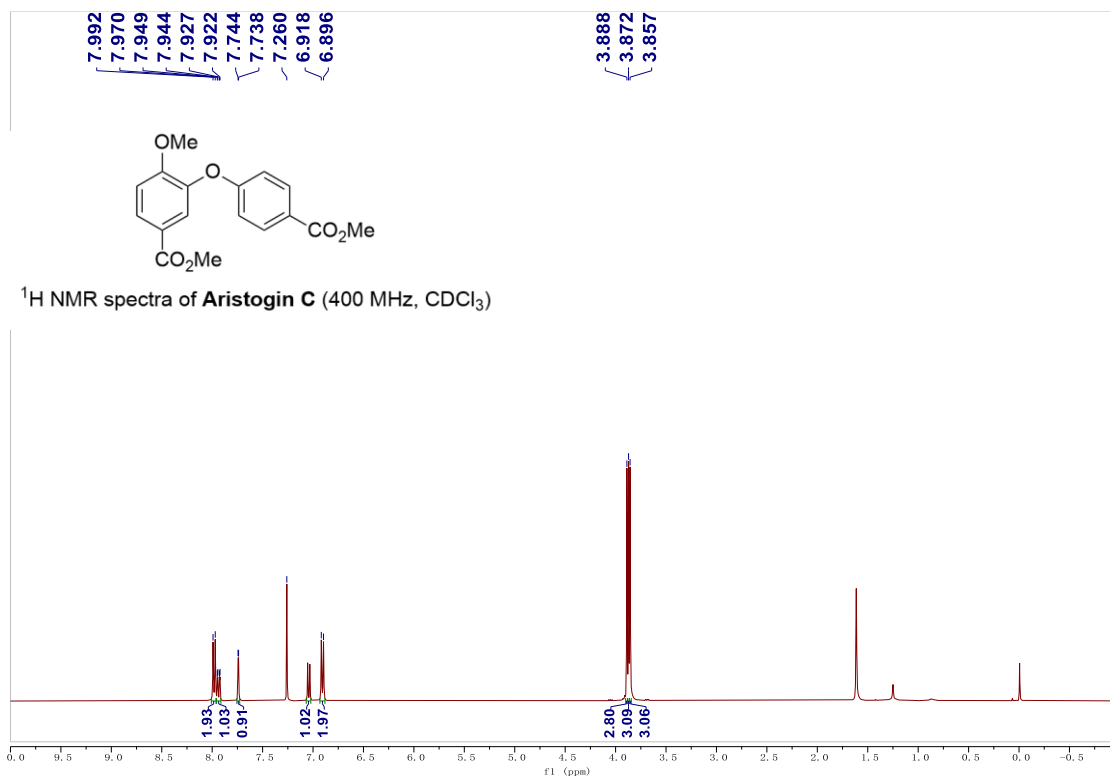

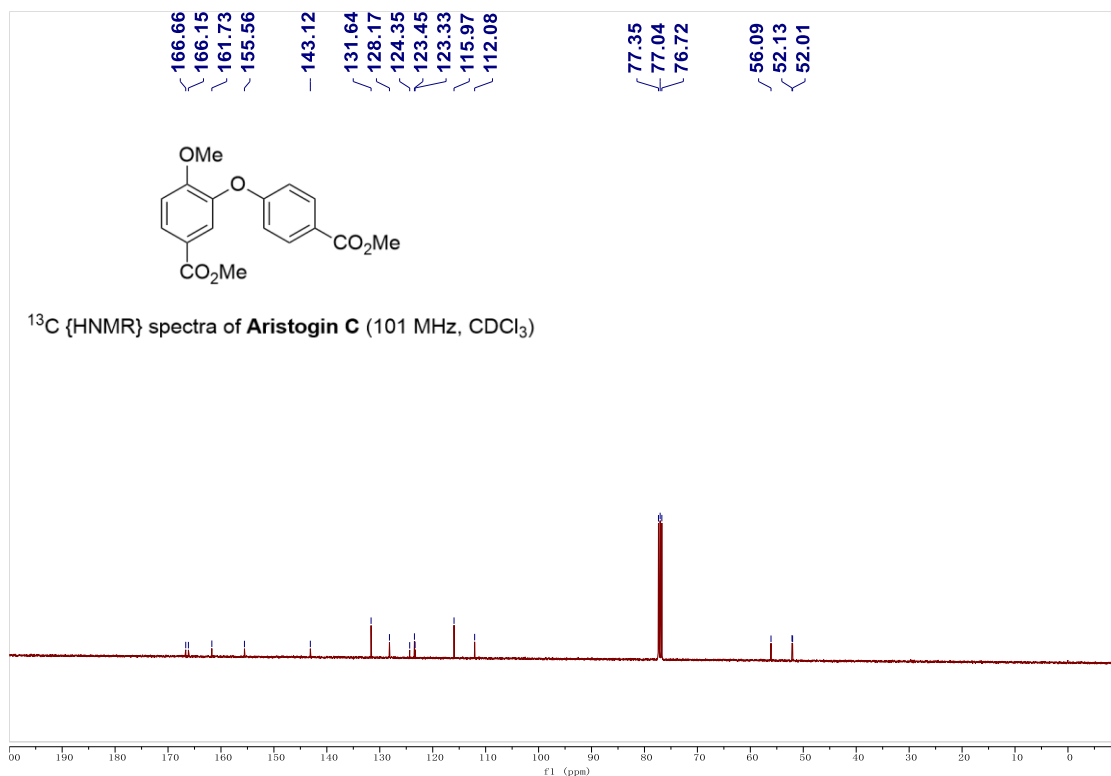

### Elemental Composition Report

Page 1

#### Single Mass Analysis

Tolerance = 5.0 mDa / DBE: min = -1.5, max = 50.0

Element prediction: Off

Number of isotope peaks used for i-FIT = 3

Monoisotopic Mass, Even Electron Ions

302 formula(e) evaluated with 1 results within limits (up to 50 best isotopic matches for each mass)

Elements Used:

C: 17-17 H: 16-16 N: 0-10 O: 0-100 Na: 0-1

12

240405-1-28 16 (0.094)

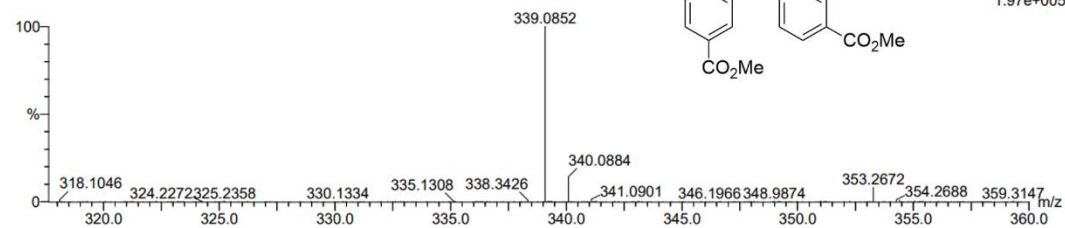

Minimum: -1.5  
Maximum: 50.0

| Mass     | Calc. Mass | mDa | PPM | DBE | i-FIT | Norm | Conf (%) | Formula       |
|----------|------------|-----|-----|-----|-------|------|----------|---------------|
| 339.0852 | 339.0845   | 0.7 | 2.1 | 9.5 | 316.9 | n/a  | n/a      | C17 H16 O6 Na |

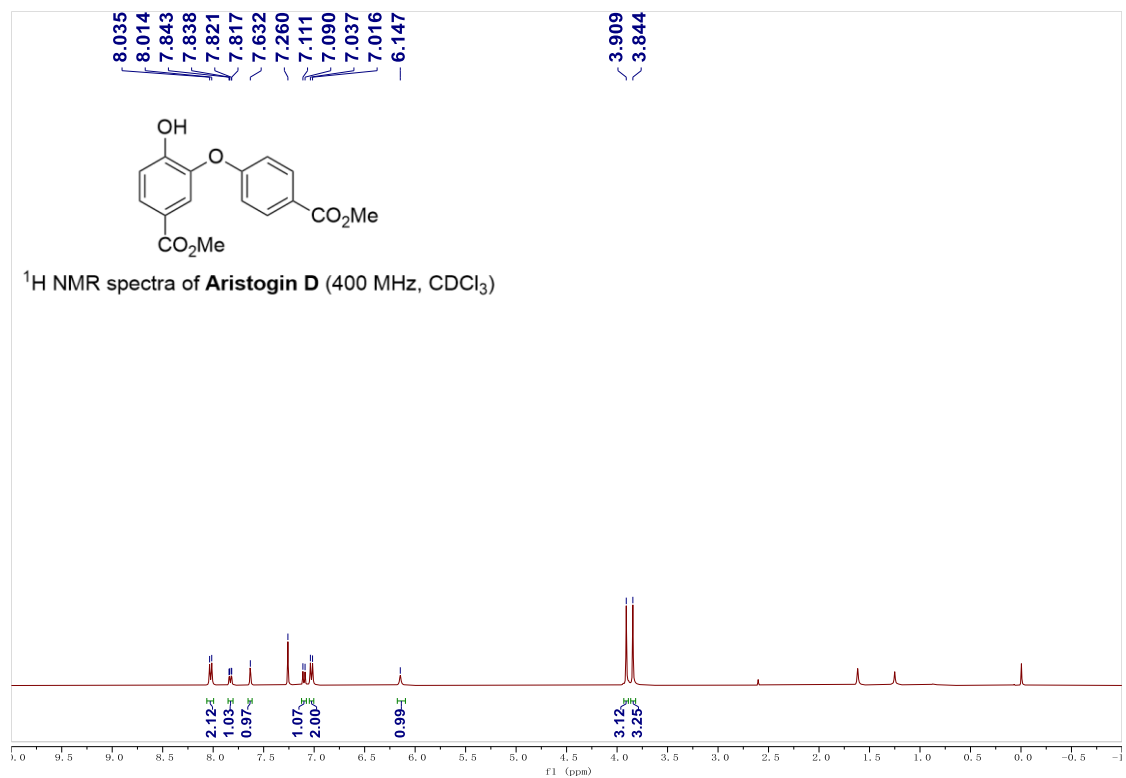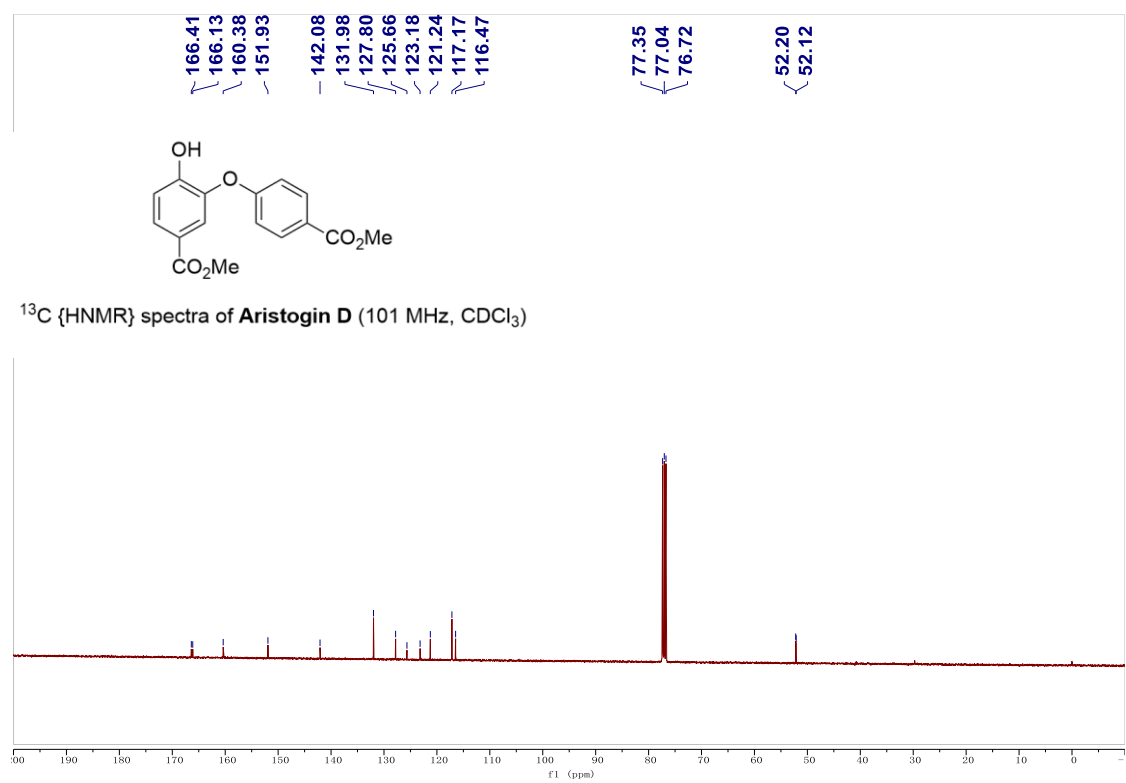

## Elemental Composition Report

Page 1

### Single Mass Analysis

Tolerance = 5.0 mDa / DBE: min = -1.5, max = 50.0

Element prediction: Off

Number of isotope peaks used for i-FIT = 3

Monoisotopic Mass, Even Electron Ions

288 formula(e) evaluated with 1 results within limits (up to 50 best isotopic matches for each mass)

Elements Used:

C: 16-16 H: 14-14 N: 0-10 O: 0-100 Na: 0-1

12

240405-1-31 8 (0.065)

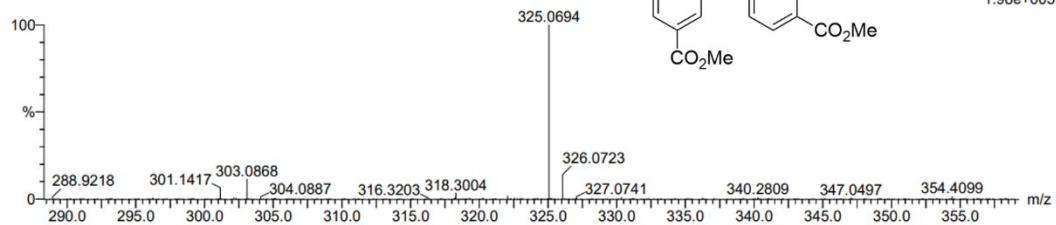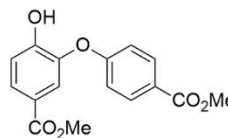

Minimum: -1.5  
Maximum: 5.0 10.0 50.0

| Mass     | Calc. Mass | mDa | PPM | DBE | i-FIT | Norm | Conf (%) | Formula       |
|----------|------------|-----|-----|-----|-------|------|----------|---------------|
| 325.0694 | 325.0688   | 0.6 | 1.8 | 9.5 | 282.5 | n/a  | n/a      | C16 H14 O6 Na |

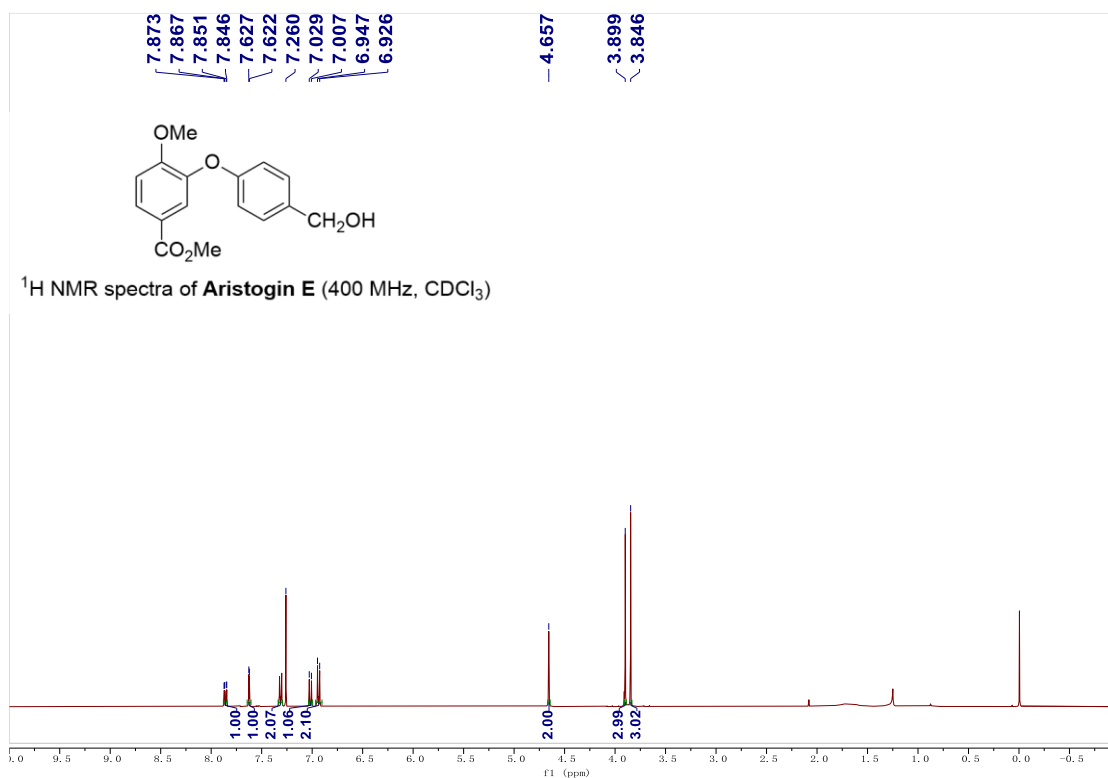

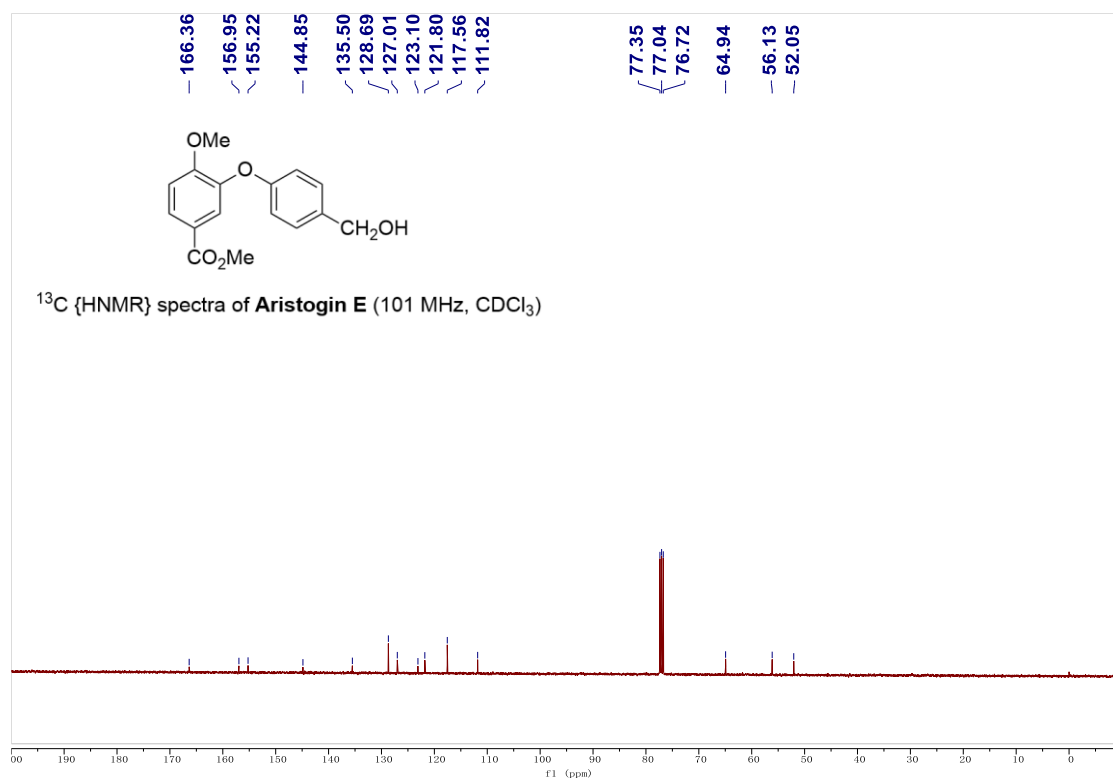

Single Mass Analysis

Tolerance = 5.0 mDa / DBE: min = -1.5, max = 50.0

Element prediction: Off

Number of isotope peaks used for i-FIT = 3

Monoisotopic Mass, Even Electron Ions

275 formula(e) evaluated with 1 results within limits (up to 50 best isotopic matches for each mass)

Elements Used:

C: 16-16 H: 16-16 N: 0-10 O: 0-100 Na: 0-1

12

240405-1-32 45 (0.197)

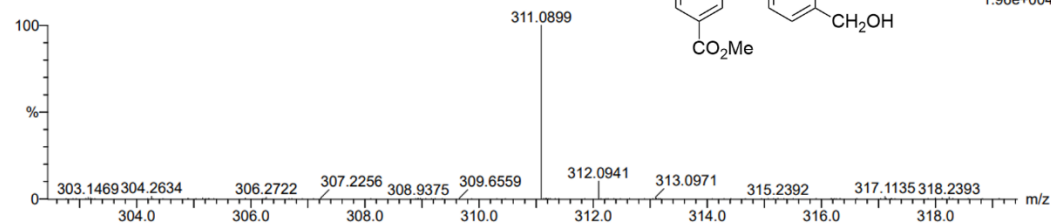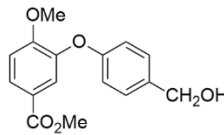

1: TOF MS ES+  
1.96e+004

Minimum: -1.5  
Maximum: 5.0 10.0 50.0

| Mass     | Calc. Mass | mDa | PPM | DBE | i-FIT | Norm | Conf (%) | Formula       |
|----------|------------|-----|-----|-----|-------|------|----------|---------------|
| 311.0899 | 311.0895   | 0.4 | 1.3 | 8.5 | 151.9 | n/a  | n/a      | C16 H16 O5 Na |

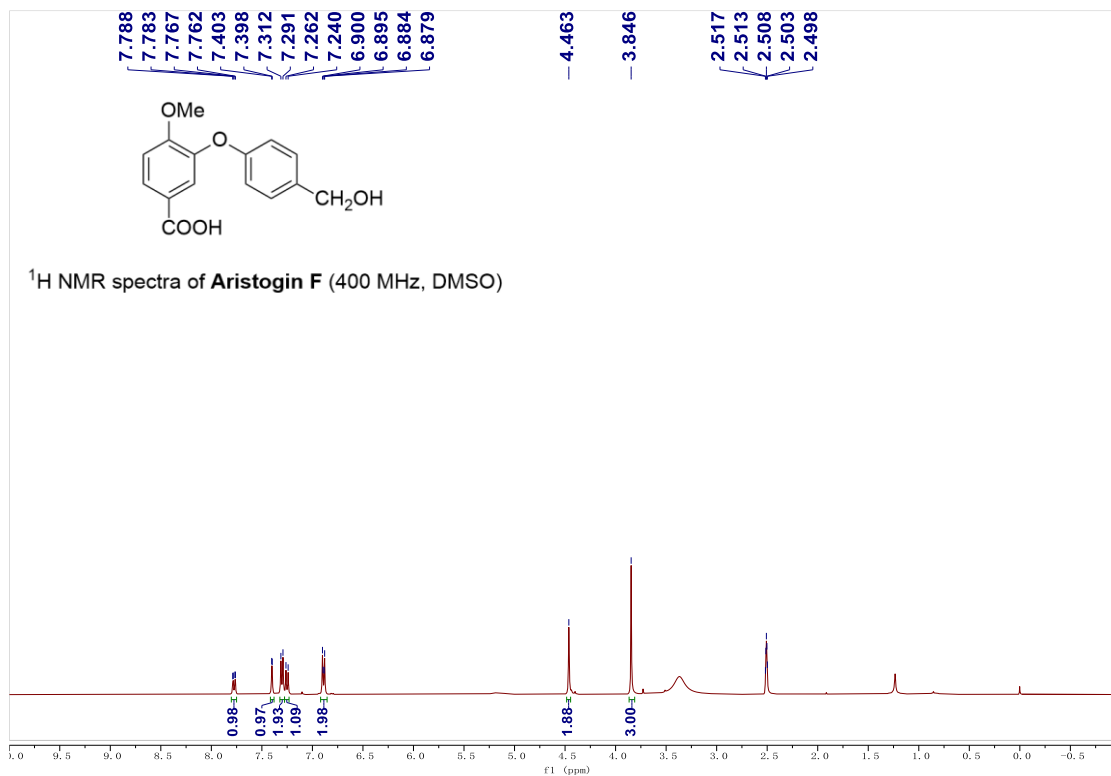

<sup>1</sup>H NMR spectra of Aristogin F (400 MHz, DMSO)



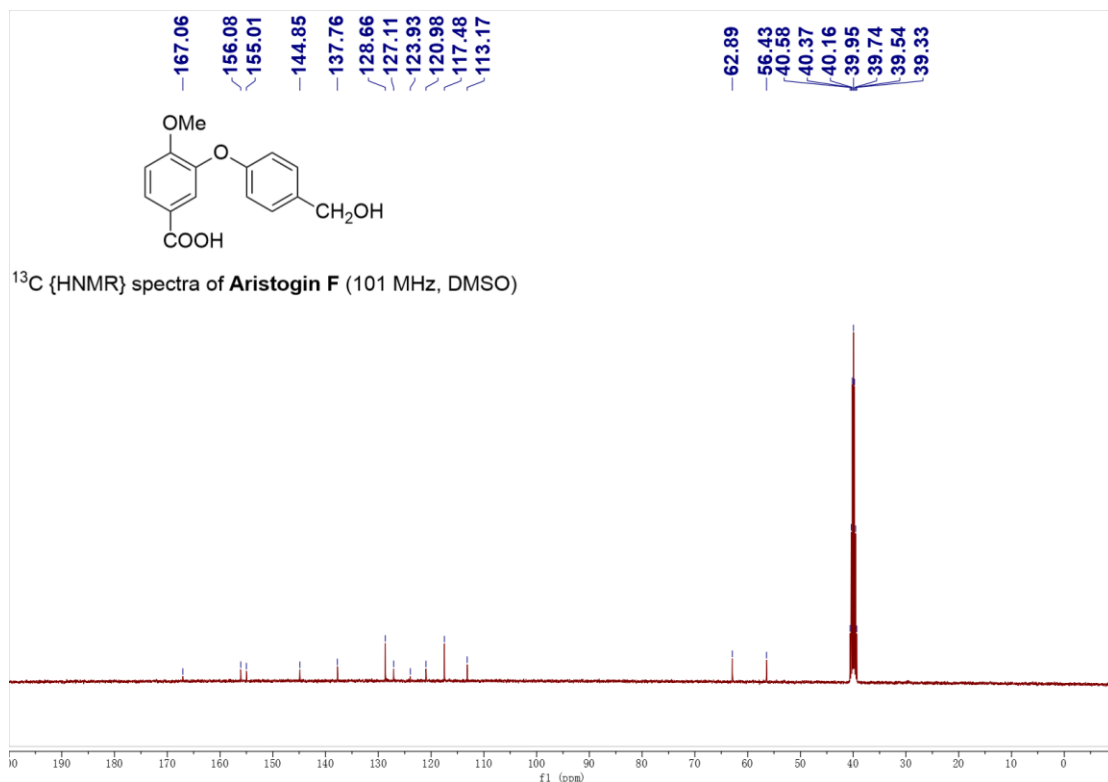

### Elemental Composition Report

Page 1

#### Single Mass Analysis

Tolerance = 5.0 mDa / DBE: min = -1.5, max = 50.0

Element prediction: Off

Number of isotope peaks used for i-FIT = 3

Monoisotopic Mass, Even Electron Ions

259 formula(e) evaluated with 1 results within limits (up to 50 best isotopic matches for each mass)

Elements Used:

C: 15-15 H: 14-14 N: 0-10 O: 0-100 Na: 0-1

12

240405-1-33 10 (0.072)

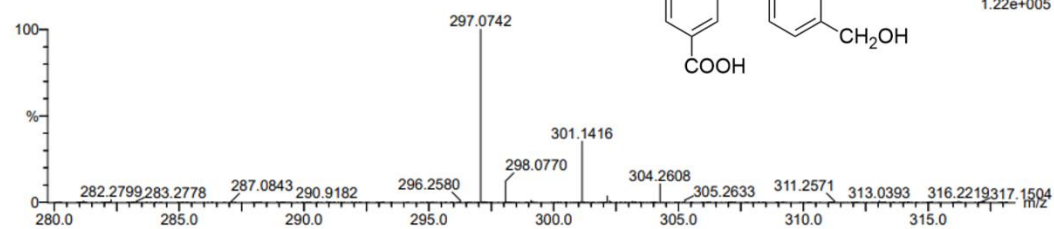

Minimum: -1.5  
Maximum: 5.0 10.0 50.0

| Mass     | Calc. Mass | mDa | PPM | DBE | i-FIT | Norm | Conf (%) | Formula                                           |
|----------|------------|-----|-----|-----|-------|------|----------|---------------------------------------------------|
| 297.0742 | 297.0739   | 0.3 | 1.0 | 8.5 | 276.3 | n/a  | n/a      | C <sub>15</sub> H <sub>14</sub> O <sub>5</sub> Na |
